# Supplementary material for: LncRNA GClnc1 Promotes Gastric Carcinogenesis and May Act as a Modular Scaffold of WDR5 and KAT2A Complexes to Specify the Histone Modification Pattern
Source: Oxford University Press journal article supplement (doi:10.1158/2159-8290.cd-15-0921), 2016-05-05
Supplement: 21598290cd150921-sup-153389_3_supp_3461354_x60rpz.xls [file 21598290cd150921-sup-153389_3_supp_3461354_x60rpz.xls]

## Sheet: Band 1(Protein List)
Supplementary Table 5. Proteins in the two distict bands specific to GClnc1 identified by Liquid Chromatography-Mass Spectrometry
Protein IDs	Protein names	Gene names	Peptides	Razor + unique peptides	Unique peptides	Sequence coverage [%]	Unique + razor sequence coverage [%]	Unique sequence coverage [%]	Mol. weight [kDa]	Sequence length	PEP	Intensity
A0FGR8	Extended synaptotagmin-2	ESYT2	16	16	16	22	22	22	102.36	921	1.2289e-78	78226000
A1A4S6	Rho GTPase-activating protein 10	ARHGAP10	10	10	10	13.6	13.6	13.6	89.374	786	1.6807e-28	16963000
O43143	Putative pre-mRNA-splicing factor ATP-dependent RNA helicase DHX15	DHX15	20	20	20	26.2	26.2	26.2	90.932	795	6.5211e-96	114450000
O43395	U4/U6 small nuclear ribonucleoprotein Prp3	PRPF3	18	18	18	31.2	31.2	31.2	77.528	683	1.708e-60	87389000
O43422	52 kDa repressor of the inhibitor of the protein kinase	PRKRIR	14	14	14	23.5	23.5	23.5	87.703	761	1.0167e-67	49325000
O43491	Band 4.1-like protein 2	EPB41L2	22	22	19	26.3	26.3	23.7	112.59	1005	8.7316e-81	184310000
O43747	AP-1 complex subunit gamma-1	AP1G1	4	4	4	5	5	5	91.35	822	7.3917e-09	8180300
O60313	Dynamin-like 120 kDa protein	OPA1	4	4	4	5.2	5.2	5.2	111.63	960	2.5908e-09	2883500
O60568	Procollagen-lysine,2-oxoglutarate 5-dioxygenase 3	PLOD3	3	3	3	5.4	5.4	5.4	84.784	738	2.1828e-05	3096400
O60645	Exocyst complex component 3	EXOC3	29	29	29	37.6	37.6	37.6	86.844	756	1.6569e-112	210170000
O75127	Pentatricopeptide repeat-containing protein 1, mitochondrial	PTCD1	2	2	2	3.4	3.4	3.4	78.855	700	2.5625e-05	577060
O75330	Hyaluronan mediated motility receptor	HMMR	32	32	32	46.4	46.4	46.4	84.099	724	4.0411e-249	386110000
O75400	Pre-mRNA-processing factor 40 homolog A	PRPF40A	3	3	3	4.8	4.8	4.8	95.02	826	1.3777e-08	3170500
O75448	Mediator of RNA polymerase II transcription subunit 24	MED24	15	15	15	21.8	21.8	21.8	110.3	989	9.1143e-80	34802000
O94874	E3 UFM1-protein ligase 1	UFL1	3	3	3	5.3	5.3	5.3	89.594	794	1.9026e-18	1951400
O94906	Pre-mRNA-processing factor 6	PRPF6	25	25	24	27	27	27	106.92	941	1.622e-97	97363000
O95782	AP-2 complex subunit alpha-1	AP2A1	24	24	24	29	29	29	107.54	977	1.0444e-80	75225000
P07900	Heat shock protein HSP 90-alpha	HSP90AA1	25	15	15	32.7	20.2	20.2	84.659	732	2.879e-158	101820000
P08238	Heat shock protein HSP 90-beta	HSP90AB1	29	29	17	35.9	35.9	20.3	83.263	724	1.9533e-201	428800000
P09874	Poly [ADP-ribose] polymerase 1	PARP1	36	36	36	37.6	37.6	37.6	113.08	1014	8.6409e-144	326390000
P11171	Protein 4.1	EPB41	16	16	15	21.4	21.4	19.7	97.016	864	3.4477e-71	43063000
P13010	X-ray repair cross-complementing protein 5	XRCC5	24	24	24	33.1	33.1	33.1	82.704	732	3.6821e-106	478580000
P13639	Elongation factor 2	EEF2	3	3	3	3.5	3.5	3.5	95.337	858	1.7169e-06	1925900
P17480	Nucleolar transcription factor 1	UBTF	2	2	2	3.4	3.4	3.4	89.405	764	3.3302e-06	3184800
P18074	TFIIH basal transcription factor complex helicase XPD subunit	ERCC2	2	2	2	4.6	4.6	4.6	86.908	760	5.1709e-08	2660500
P19447	TFIIH basal transcription factor complex helicase XPB subunit	ERCC3	12	12	12	19.9	19.9	19.9	89.277	782	9.4248e-121	68140000
P27448	MAP/microtubule affinity-regulating kinase 3	MARK3	15	15	9	23.1	23.1	16.9	84.488	753	5.5354e-68	37824000
P33991	DNA replication licensing factor MCM4	MCM4	15	15	15	21.3	21.3	21.3	96.557	863	1.562e-55	50663000
P33992	DNA replication licensing factor MCM5	MCM5	4	4	4	7.8	7.8	7.8	82.285	734	6.3567e-12	4046600
P33993	DNA replication licensing factor MCM7	MCM7	24	24	23	43.1	43.1	41.2	81.307	719	3.8834e-94	125640000
P40939	Trifunctional enzyme subunit alpha, mitochondrial;Long-chain enoyl-CoA hydratase;Long chain 3-hydroxyacyl-CoA dehydrogenase	HADHA	19	19	19	30.8	30.8	30.8	82.999	763	5.3935e-113	53896000
P50416	Carnitine O-palmitoyltransferase 1, liver isoform	CPT1A	15	15	15	22	22	22	88.367	773	1.2954e-64	35714000
P53618	Coatomer subunit beta	COPB1	2	2	2	3	3	3	107.14	953	3.9878e-06	513680
P55072	Transitional endoplasmic reticulum ATPase	VCP	3	3	3	5.3	5.3	5.3	89.321	806	2.9976e-08	284440
P55884	Eukaryotic translation initiation factor 3 subunit B	EIF3B	2	2	2	2.7	2.7	2.7	92.48	814	2.8509e-08	2371500
P63010	AP-2 complex subunit beta	AP2B1	19	19	19	26.4	26.4	26.4	104.55	937	3.1376e-97	69267000
Q01780	Exosome component 10	EXOSC10	10	10	10	15	15	15	100.83	885	4.8878e-49	14575000
Q02241	Kinesin-like protein KIF23	KIF23	6	6	6	9.1	9.1	9.1	110.06	960	2.3065e-26	12123000
Q02809	Procollagen-lysine,2-oxoglutarate 5-dioxygenase 1	PLOD1	3	3	3	5.2	5.2	5.2	83.549	727	2.384e-06	1234800
Q08945	FACT complex subunit SSRP1	SSRP1	11	11	11	17.2	17.2	17.2	81.074	709	8.3303e-42	127090000
Q09161	Nuclear cap-binding protein subunit 1	NCBP1	5	5	5	6.8	6.8	6.8	91.838	790	1.2168e-17	5242400
Q12788	Transducin beta-like protein 3	TBL3	6	6	6	9.5	9.5	9.5	89.034	808	4.8569e-32	6631500
Q12797	Aspartyl/asparaginyl beta-hydroxylase	ASPH	2	2	2	4	4	4	85.862	758	8.3491e-05	1613500
Q13214	Semaphorin-3B	SEMA3B	5	5	5	8.7	8.7	8.7	83.121	749	2.4559e-12	8161800
Q13330	Metastasis-associated protein MTA1	MTA1	4	4	4	7.1	7.1	7.1	80.785	715	2.3034e-09	3316400
Q13428	Treacle protein	TCOF1	2	2	2	2.4	2.4	2.4	96.754	958	0.00022772	603580
Q13619	Cullin-4A	CUL4A	8	8	8	13.3	13.3	13.3	87.679	759	1.2617e-29	8137600
Q13724	Mannosyl-oligosaccharide glucosidase	MOGS	3	3	3	5.7	5.7	5.7	91.916	837	4.0027e-09	4184400
Q14974	Importin subunit beta-1	KPNB1	8	8	8	12	12	12	97.169	876	5.213e-52	7206900
Q15022	Polycomb protein SUZ12	SUZ12	12	12	12	21	21	21	83.054	739	8.5375e-125	48783000
Q15542	Transcription initiation factor TFIID subunit 5	TAF5	4	4	4	9.1	9.1	9.1	86.829	800	1.1022e-11	4026200
Q16891	Mitochondrial inner membrane protein	IMMT	12	12	12	21	21	21	83.677	758	5.5288e-34	30072000
Q2NL82	Pre-rRNA-processing protein TSR1 homolog	TSR1	4	4	4	6.2	6.2	6.2	91.809	804	5.1812e-18	2780300
Q5BJF6	Outer dense fiber protein 2	ODF2	3	3	3	2.9	2.9	2.9	95.4	829	9.9313e-07	815280
Q6NSJ5	Leucine-rich repeat-containing protein 8E	LRRC8E	8	8	7	14.6	14.6	13.3	90.246	796	2.3582e-25	9677900
Q6SJ93	Protein FAM111B	FAM111B	3	3	3	4.8	4.8	4.8	84.673	734	2.0731e-12	5666800
Q7KZI7	Serine/threonine-protein kinase MARK2	MARK2	15	9	9	23.4	17.4	17.4	87.91	788	7.4179e-47	22317000
Q8IWT6	Leucine-rich repeat-containing protein 8A	LRRC8A	19	19	18	30.5	30.5	29	94.198	810	1.3371e-91	71713000
Q8IXB1	DnaJ homolog subfamily C member 10	DNAJC10	3	3	3	4.9	4.9	4.9	91.079	793	3.7674e-09	539840
Q8N1F7	Nuclear pore complex protein Nup93	NUP93	9	9	9	12.6	12.6	12.6	93.487	819	3.9939e-26	9575600
Q8N3E9	1-phosphatidylinositol 4,5-bisphosphate phosphodiesterase delta-3	PLCD3	17	17	17	34.5	34.5	34.5	89.257	789	1.4532e-112	205300000
Q8N6R0	Methyltransferase-like protein 13	METTL13	3	3	3	5.6	5.6	5.6	78.767	699	3.7988e-09	1889000
Q8NE71	ATP-binding cassette sub-family F member 1	ABCF1	6	6	6	8.6	8.6	8.6	95.925	845	3.1966e-40	10299000
Q8NI36	WD repeat-containing protein 36	WDR36	3	3	3	3.6	3.6	3.6	105.32	951	8.6523e-08	2756400
Q8WTT2	Nucleolar complex protein 3 homolog	NOC3L	15	15	15	19.5	19.5	19.5	92.547	800	3.1866e-100	102780000
Q8WUA4	General transcription factor 3C polypeptide 2	GTF3C2	13	13	13	18.8	18.8	18.8	100.68	911	1.1046e-30	26698000
Q8WXW3	Progesterone-induced-blocking factor 1	PIBF1	12	12	12	17.7	17.7	17.7	89.804	757	6.2389e-36	14385000
Q92541	RNA polymerase-associated protein RTF1 homolog	RTF1	4	4	4	6.5	6.5	6.5	80.313	710	8.464e-11	3071600
Q92674	Centromere protein I	CENPI	3	3	3	4.8	4.8	4.8	86.719	756	8.397e-11	1434700
Q92830	Histone acetyltransferase KAT2A	KAT2A	7	7	7	8	8	8	93.924	837	5.2572e-18	19408000
Q92974	Rho guanine nucleotide exchange factor 2	ARHGEF2	4	4	4	5	5	5	111.54	986	3.6024e-25	5721700
Q96KP1	Exocyst complex component 2	EXOC2	19	19	19	20.9	20.9	20.9	104.07	924	6.8972e-78	54507000
Q96P47	Arf-GAP with GTPase, ANK repeat and PH domain-containing protein 3	AGAP3	2	2	2	3.5	3.5	3.5	95.043	875	8.4193e-07	1914100
Q99459	Cell division cycle 5-like protein	CDC5L	11	11	11	20.8	20.8	20.8	92.25	802	7.9162e-79	30984000
Q99985	Semaphorin-3C	SEMA3C	8	8	8	13	13	13	85.206	751	1.3208e-28	7403400
Q9BQ39	ATP-dependent RNA helicase DDX50	DDX50	14	12	12	21.2	17.5	17.5	82.564	737	1.2203e-64	24894000
Q9BUJ2	Heterogeneous nuclear ribonucleoprotein U-like protein 1	HNRNPUL1	4	4	4	5.4	5.4	5.4	95.737	856	7.6822e-32	18273000
Q9BXJ9	N-alpha-acetyltransferase 15, NatA auxiliary subunit	NAA15	14	14	14	14.7	14.7	14.7	101.27	866	2.2445e-51	27591000
Q9H3U1	Protein unc-45 homolog A	UNC45A	23	23	23	28.6	28.6	28.6	103.08	944	8.7996e-143	74967000
Q9H4G0	Band 4.1-like protein 1	EPB41L1	16	14	13	22.2	20.5	19.1	98.502	881	5.421e-46	44066000
Q9NR30	Nucleolar RNA helicase 2	DDX21	45	45	43	46.7	46.7	44.8	87.343	783	0	3849000000
Q9NXF1	Testis-expressed sequence 10 protein	TEX10	32	32	32	36.8	36.8	36.8	105.67	929	6.923e-164	388110000
Q9P2E5	Chondroitin sulfate glucuronyltransferase	CHPF2	2	2	2	3.2	3.2	3.2	85.947	772	3.829e-18	1428300
Q9UHI6	Probable ATP-dependent RNA helicase DDX20	DDX20	3	3	3	5.3	5.3	5.3	92.239	824	5.0329e-13	2503700
Q9UKN8	General transcription factor 3C polypeptide 4	GTF3C4	30	30	30	44.5	44.5	44.5	91.981	822	2.9751e-155	293580000
Q9UL63	Muskelin	MKLN1	2	2	2	3.7	3.7	3.7	84.767	735	0.00059069	1788900
Q9Y2G8	DnaJ homolog subfamily C member 16	DNAJC16	3	3	3	4.1	4.1	4.1	90.59	782	2.7632e-05	1351700
Q9Y2X0	Mediator of RNA polymerase II transcription subunit 16	MED16	12	12	12	16.5	16.5	16.5	96.792	877	3.0667e-55	41560000
Q9Y4W2	Ribosomal biogenesis protein LAS1L	LAS1L	19	19	19	39	39	39	83.064	734	5.4159e-109	227070000
Q9Y4W6	AFG3-like protein 2	AFG3L2	26	26	26	32	32	32	88.583	797	1.0536e-161	391150000
Q9Y5L0	Transportin-3	TNPO3	2	2	2	3.9	3.9	3.9	104.2	923	3.7469e-06	207770
Q9Y5Q9	General transcription factor 3C polypeptide 3	GTF3C3	9	9	9	14.4	14.4	14.4	101.27	886	1.9855e-49	16852000
Q9Y678	Coatomer subunit gamma-1	COPG1	9	9	9	13.6	13.6	13.6	97.717	874	3.9544e-35	20602000
Q9Y6U3	Adseverin	SCIN	3	3	3	5.2	5.2	5.2	80.488	715	1.3956e-20	2376700

## Sheet: Band 1 (Peptide List)
Protein IDs	Protein names	Gene names	Sequence	Length	Missed cleavages	Mass	Unique (Groups)	Unique (Proteins)	Charges	Charges	PEP	Score	Intensity	Deamidation (NQ)	Oxidation (M)
A0FGR8	Extended synaptotagmin-2	ESYT2	ALALLEDEER	10	0	1157.59	yes	yes	2		1.8485e-05	167.93	4393900
A0FGR8	Extended synaptotagmin-2	ESYT2	EPTPSIASDISLPIATQELR	20	0	2137.13	yes	yes	2	3	5.9197e-07	132.4	6291200
A0FGR8	Extended synaptotagmin-2	ESYT2	ERPPDHQHSAQVK	13	1	1527.75	yes	yes	3		0.025862	71.085	126480
A0FGR8	Extended synaptotagmin-2	ESYT2	ETIEPAVR	8	0	913.487	yes	yes	2		0.026656	85.161	4556400
A0FGR8	Extended synaptotagmin-2	ESYT2	FQLSNSGPNSTIK	13	0	1391.7	yes	yes	2		0.00054118	128.35	4368200
A0FGR8	Extended synaptotagmin-2	ESYT2	GANTHLSTFSFTK	13	0	1409.69	yes	yes	3		0.0289	65.495	3492300
A0FGR8	Extended synaptotagmin-2	ESYT2	IHFIEAQDLQGK	12	0	1397.73	yes	yes	2		0.00053108	117.03	0
A0FGR8	Extended synaptotagmin-2	ESYT2	ITVPLVSEVQIAQLR	15	0	1664.98	yes	yes	2	3	4.4733e-06	158.86	4837300
A0FGR8	Extended synaptotagmin-2	ESYT2	LLDEWFTLDEVPK	13	0	1603.81	yes	yes	2		8.2367e-08	171.62	1382000
A0FGR8	Extended synaptotagmin-2	ESYT2	NLIAFSEDGSDPYVR	15	0	1681.79	yes	yes	2		9.771e-21	249.36	3277700
A0FGR8	Extended synaptotagmin-2	ESYT2	RQDLEVEVR	9	1	1142.6	yes	yes	2		0.046721	53.597	1342200
A0FGR8	Extended synaptotagmin-2	ESYT2	SSSSLLASPGHISVK	15	0	1468.79	yes	yes	2	3	0.0015493	115.12	10048000
A0FGR8	Extended synaptotagmin-2	ESYT2	VGNQIFQSR	9	0	1047.55	yes	yes	2		0.00016111	160.75	17112000
A0FGR8	Extended synaptotagmin-2	ESYT2	VLVALASEELAK	12	0	1241.72	yes	yes	2		3.8369e-11	208.74	11550000
A0FGR8	Extended synaptotagmin-2	ESYT2	VPLSQLLTSEDMTVSQR	17	0	1902.97	yes	yes	3		0.0015695	96.096	3551400
A0FGR8	Extended synaptotagmin-2	ESYT2	VYTENVDKR	9	1	1122.57	yes	yes	2	3	0.0077576	106.88	1897200
A1A4S6	Rho GTPase-activating protein 10	ARHGAP10	DSHLQEADIQVEQNR	15	0	1780.83	yes	yes	3		7.8283e-06	148.41	2319000
A1A4S6	Rho GTPase-activating protein 10	ARHGAP10	EIMALSVTETLIKPLEK	17	1	1914.07	yes	yes	2		5.4891e-06	168.55	379600
A1A4S6	Rho GTPase-activating protein 10	ARHGAP10	FEFIGDAVTDDER	13	0	1512.67	yes	yes	2		0.00033086	134.06	1227900
A1A4S6	Rho GTPase-activating protein 10	ARHGAP10	HLTNVSNHSK	10	0	1135.57	yes	yes	3		0.029913	69.65	69594
A1A4S6	Rho GTPase-activating protein 10	ARHGAP10	LGDGEVFFLK	10	0	1123.59	yes	yes	2		0.00044211	130.98	2545400
A1A4S6	Rho GTPase-activating protein 10	ARHGAP10	LLSMLMDVK	9	0	1048.57	yes	yes	2		0.0034667	114.86	1310700
A1A4S6	Rho GTPase-activating protein 10	ARHGAP10	MGFTIIR	7	0	836.458	yes	yes	2		0.017557	101.64	1349900
A1A4S6	Rho GTPase-activating protein 10	ARHGAP10	NYSLIDK	7	0	851.439	yes	yes	2		0.049586	77.318	841180
A1A4S6	Rho GTPase-activating protein 10	ARHGAP10	SEVEELMNK	9	0	1077.5	yes	yes	2		0.011358	96.665	1424200
A1A4S6	Rho GTPase-activating protein 10	ARHGAP10	VNAIHFLVHK	10	0	1176.68	yes	yes	3		0.026076	70.816	5496000
O43143	Putative pre-mRNA-splicing factor ATP-dependent RNA helicase DHX15	DHX15	TLATDILMGVLK	12	0	1273.73	yes	yes	2	3	2.4217e-15	251.81	24920000		+
O43143	Putative pre-mRNA-splicing factor ATP-dependent RNA helicase DHX15	DHX15	ALVTGYFMQVAHLER	15	0	1733.89	yes	yes	2	3	8.3976e-06	154.46	4170200
O43143	Putative pre-mRNA-splicing factor ATP-dependent RNA helicase DHX15	DHX15	ASTNAMLISAGLPPLK	16	0	1582.88	yes	yes	2		0.0001544	133.87	2074000
O43143	Putative pre-mRNA-splicing factor ATP-dependent RNA helicase DHX15	DHX15	DYYINIR	7	0	955.476	yes	yes	2		0.012494	104.21	4719600
O43143	Putative pre-mRNA-splicing factor ATP-dependent RNA helicase DHX15	DHX15	EVDDLGPEVGDIK	13	0	1384.67	yes	yes	2		6.4069e-08	182.37	9799100
O43143	Putative pre-mRNA-splicing factor ATP-dependent RNA helicase DHX15	DHX15	FAHIDGDHLTLLNVYHAFK	19	0	2210.13	yes	yes	4		2.5203e-05	116.87	2920100
O43143	Putative pre-mRNA-splicing factor ATP-dependent RNA helicase DHX15	DHX15	FTDILVR	7	0	862.491	yes	yes	2		0.025539	92.47	8750700
O43143	Putative pre-mRNA-splicing factor ATP-dependent RNA helicase DHX15	DHX15	HQSFVLVGETGSGK	14	0	1444.73	yes	yes	2	3	0.00039989	126.56	5158600
O43143	Putative pre-mRNA-splicing factor ATP-dependent RNA helicase DHX15	DHX15	HRLDLGEDYPSGK	13	1	1485.72	yes	yes	3		0.00063328	134.06	1793200
O43143	Putative pre-mRNA-splicing factor ATP-dependent RNA helicase DHX15	DHX15	IFEPPPPK	8	0	923.512	yes	yes	2		0.021243	91.318	4638700
O43143	Putative pre-mRNA-splicing factor ATP-dependent RNA helicase DHX15	DHX15	IRVESLLVTAISK	13	1	1427.87	yes	yes	2	3	0.001652	119.77	6547400
O43143	Putative pre-mRNA-splicing factor ATP-dependent RNA helicase DHX15	DHX15	LDLGEDYPSGK	11	0	1192.56	yes	yes	2		0.0073048	97.779	934520
O43143	Putative pre-mRNA-splicing factor ATP-dependent RNA helicase DHX15	DHX15	LQLPVWEYK	9	0	1174.64	yes	yes	2		0.022319	80.102	2087900
O43143	Putative pre-mRNA-splicing factor ATP-dependent RNA helicase DHX15	DHX15	SLMSADNVR	9	0	991.476	yes	yes	2		0.046702	77.533	0
O43143	Putative pre-mRNA-splicing factor ATP-dependent RNA helicase DHX15	DHX15	SNLGSVVLQLK	11	0	1156.68	yes	yes	2		2.9114e-18	267.07	7802000
O43143	Putative pre-mRNA-splicing factor ATP-dependent RNA helicase DHX15	DHX15	TEMQDNTYPEILR	13	0	1608.75	yes	yes	2		1.4592e-05	152.16	1761200
O43143	Putative pre-mRNA-splicing factor ATP-dependent RNA helicase DHX15	DHX15	TGHYLTVK	8	0	917.497	yes	yes	2		0.0066233	108.74	1892800
O43143	Putative pre-mRNA-splicing factor ATP-dependent RNA helicase DHX15	DHX15	VESLLVTAISK	11	0	1158.69	yes	yes	2		1.502e-10	224.66	3958400
O43143	Putative pre-mRNA-splicing factor ATP-dependent RNA helicase DHX15	DHX15	YGVIILDEAHER	12	0	1413.73	yes	yes	2	3	0.0024226	107.39	18033000
O43143	Putative pre-mRNA-splicing factor ATP-dependent RNA helicase DHX15	DHX15	YMTDGMLLR	9	0	1098.52	yes	no	2		0.00058175	146.69	2486600
O43395	U4/U6 small nuclear ribonucleoprotein Prp3	PRPF3	LGLMPPPEPK	10	0	1077.59	yes	yes	2		0.026749	72.243	0		+
O43395	U4/U6 small nuclear ribonucleoprotein Prp3	PRPF3	LQAEISQAAR	10	0	1085.58	yes	yes	2		3.0683e-05	160.67	15129000	+
O43395	U4/U6 small nuclear ribonucleoprotein Prp3	PRPF3	AADHLKPFLDDSTLR	15	1	1697.87	yes	yes	3		0.0010822	118.52	6346200
O43395	U4/U6 small nuclear ribonucleoprotein Prp3	PRPF3	DQTKPTPLILDEQGR	15	1	1709.89	yes	yes	3		2.6392e-05	160.63	6093100
O43395	U4/U6 small nuclear ribonucleoprotein Prp3	PRPF3	DVNVVVVEGGPK	12	0	1210.66	yes	yes	2		0.0026561	113.53	7526400
O43395	U4/U6 small nuclear ribonucleoprotein Prp3	PRPF3	EIELTHR	7	0	896.472	yes	yes	2		0.027505	89.55	2077100
O43395	U4/U6 small nuclear ribonucleoprotein Prp3	PRPF3	EKPSEDMESNTFFDPR	16	1	1927.83	yes	yes	3		0.022538	70.134	2339800
O43395	U4/U6 small nuclear ribonucleoprotein Prp3	PRPF3	ELDELKPWIEK	11	1	1398.74	yes	yes	2		1.7549e-07	215.04	1817100
O43395	U4/U6 small nuclear ribonucleoprotein Prp3	PRPF3	EVFGDDSEISK	11	0	1224.55	yes	yes	2		0.003762	103.21	4131200
O43395	U4/U6 small nuclear ribonucleoprotein Prp3	PRPF3	FVDKLFEAVEEGR	13	1	1537.78	yes	yes	3		0.03905	57.53	907150
O43395	U4/U6 small nuclear ribonucleoprotein Prp3	PRPF3	IEANAGQLYLTGVVVLHK	18	0	1924.08	yes	yes	3		0.012671	73.593	1111600
O43395	U4/U6 small nuclear ribonucleoprotein Prp3	PRPF3	LALIAPK	7	0	724.485	yes	yes	2		0.03212	88.734	10210000
O43395	U4/U6 small nuclear ribonucleoprotein Prp3	PRPF3	LFEAVEEGR	9	0	1048.52	yes	yes	2		0.00030249	154.85	7275100
O43395	U4/U6 small nuclear ribonucleoprotein Prp3	PRPF3	LKEDISQGVHISVYR	15	1	1742.93	yes	yes	3		0.013629	81.327	1492200
O43395	U4/U6 small nuclear ribonucleoprotein Prp3	PRPF3	LPIGNTIQPSQAATFMNDAIEK	22	0	2358.19	yes	yes	2	3	2.1864e-07	135.23	7805600
O43395	U4/U6 small nuclear ribonucleoprotein Prp3	PRPF3	QLSFISPPTPQPK	13	0	1438.78	yes	yes	2		0.013277	85.287	911210
O43395	U4/U6 small nuclear ribonucleoprotein Prp3	PRPF3	VLGTEAVQDPTK	12	0	1256.66	yes	yes	2		1.0906e-11	224.25	9109500
O43395	U4/U6 small nuclear ribonucleoprotein Prp3	PRPF3	VLGTEAVQDPTKVEAHVR	18	1	1948.04	yes	yes	4		0.032312	66.387	3107100
O43422	52 kDa repressor of the inhibitor of the protein kinase	PRKRIR	AHQGNLESQLTSESYYK	17	0	1953.91	yes	yes	3		0.00012741	110.57	6525700
O43422	52 kDa repressor of the inhibitor of the protein kinase	PRKRIR	DIELPSTIYEALHLPDIK	18	0	2066.09	yes	yes	2	3	0.0010354	100.77	1520200
O43422	52 kDa repressor of the inhibitor of the protein kinase	PRKRIR	DIFSEQHLK	9	0	1115.56	yes	yes	2		0.0014212	128.86	6195100
O43422	52 kDa repressor of the inhibitor of the protein kinase	PRKRIR	DNAIPTIFDLTSHLNNPHSR	20	0	2261.12	yes	yes	3	4	0.00066091	88.486	6920000
O43422	52 kDa repressor of the inhibitor of the protein kinase	PRKRIR	EEFIGFLPYEADAEILAVK	19	0	2153.09	yes	yes	2		8.2679e-05	114.52	302080
O43422	52 kDa repressor of the inhibitor of the protein kinase	PRKRIR	ETLSVPTVEHIIQELK	16	0	1835	yes	yes	2		7.2131e-06	146.27	777320
O43422	52 kDa repressor of the inhibitor of the protein kinase	PRKRIR	FNTSEEHHADMYR	13	0	1635.67	yes	yes	3		0.0052992	87.641	2795400
O43422	52 kDa repressor of the inhibitor of the protein kinase	PRKRIR	FVDESHNLR	9	0	1115.54	yes	yes	2		0.0059077	107.21	0
O43422	52 kDa repressor of the inhibitor of the protein kinase	PRKRIR	GKDIELPSTIYEALHLPDIK	20	1	2251.21	yes	yes	3		0.00072093	105.01	988900
O43422	52 kDa repressor of the inhibitor of the protein kinase	PRKRIR	GQAYIVSSGFSSK	13	0	1329.66	yes	yes	2		0.0013987	120.21	2568400
O43422	52 kDa repressor of the inhibitor of the protein kinase	PRKRIR	IKELSEDEIR	10	1	1230.65	yes	yes	2	3	0.0033054	120.03	10107000
O43422	52 kDa repressor of the inhibitor of the protein kinase	PRKRIR	INSGEEVLR	9	0	1015.53	yes	yes	2		0.00083564	142.36	6009000
O43422	52 kDa repressor of the inhibitor of the protein kinase	PRKRIR	SELPTDNSETVENT	14	0	1534.66	yes	yes	2		1.3276e-26	289.72	2339800
O43422	52 kDa repressor of the inhibitor of the protein kinase	PRKRIR	STQSDLAFFR	10	0	1170.57	yes	yes	2		0.0011885	123.01	2275900
O43491	Band 4.1-like protein 2	EPB41L2	HSNLMLEELDKAQEDILK	18	1	2125.07	yes	yes	3		2.5518e-09	189.45	8353600		+
O43491	Band 4.1-like protein 2	EPB41L2	VEMQPTELVSK	11	0	1259.64	yes	yes	2		0.0001181	148.13	21407000		+
O43491	Band 4.1-like protein 2	EPB41L2	HQASISELKR	10	1	1167.64	yes	yes	3		0.00012198	141.89	21950000	+
O43491	Band 4.1-like protein 2	EPB41L2	LVSPEQPPK	9	0	993.549	yes	yes	2		0.02462	81.525	12013000	+
O43491	Band 4.1-like protein 2	EPB41L2	APHLQLIEGK	10	0	1104.63	yes	yes	2	3	0.0023077	113.44	19660000
O43491	Band 4.1-like protein 2	EPB41L2	DFPGAAGEISAYGPGLVSIAVVQDGDGRR	29	1	2873.43	yes	yes	3		0.0025911	75.945	843950
O43491	Band 4.1-like protein 2	EPB41L2	DSEGVDIK	8	0	861.408	yes	yes	2		0.013702	101.72	787300
O43491	Band 4.1-like protein 2	EPB41L2	DSSQLGTDATK	11	0	1121.52	yes	yes	2		0.0038605	104.94	443320
O43491	Band 4.1-like protein 2	EPB41L2	DYFGLLFQESPEQK	14	0	1699.81	yes	yes	2		2.1507e-15	222.56	3921100
O43491	Band 4.1-like protein 2	EPB41L2	ETQEDKLEGGAAK	13	1	1374.66	yes	yes	2		0.04005	107.65	711210
O43491	Band 4.1-like protein 2	EPB41L2	FLTLGSK	7	0	764.443	no	no	2		0.045667	81.191	14998000
O43491	Band 4.1-like protein 2	EPB41L2	FYPPDPSQLTEDITR	15	0	1777.85	yes	yes	2		0.040042	59.709	4398600
O43491	Band 4.1-like protein 2	EPB41L2	GDAEEMAQK	9	0	977.412	yes	yes	2		0.00084536	143.03	232720
O43491	Band 4.1-like protein 2	EPB41L2	LSMYGVDLHHAK	12	0	1369.68	no	no	2	3	0.003803	101.56	17928000
O43491	Band 4.1-like protein 2	EPB41L2	NLPWLFTFNVK	11	0	1377.74	yes	yes	2		0.0030112	105.25	1072500
O43491	Band 4.1-like protein 2	EPB41L2	NWLDPAK	7	0	842.429	no	no	2		0.020397	98.458	1964000
O43491	Band 4.1-like protein 2	EPB41L2	QASTLIDRPAPHFER	15	1	1736.9	yes	yes	3		0.03953	55.196	1892600
O43491	Band 4.1-like protein 2	EPB41L2	SLDGAPIGVMDQSLMK	16	0	1660.82	yes	yes	2		1.5173e-06	165.24	6726900
O43491	Band 4.1-like protein 2	EPB41L2	VEGDNIYVR	9	0	1063.53	yes	yes	2		0.00014052	163.38	12033000
O43491	Band 4.1-like protein 2	EPB41L2	VEVKEEKPSVSK	12	2	1357.75	yes	yes	3		0.017855	101.56	977890
O43491	Band 4.1-like protein 2	EPB41L2	VKETQEDKLEGGAAK	15	2	1601.83	yes	yes	2	3	0.0014031	130.47	10870000
O43491	Band 4.1-like protein 2	EPB41L2	VRPAELEQFESTIGFK	16	1	1849.96	yes	yes	3		4.6439e-09	203.27	21123000
O43747	AP-1 complex subunit gamma-1	AP1G1	AVEYNALFK	9	0	1053.55	yes	yes	2		0.019499	86.67	1109400
O43747	AP-1 complex subunit gamma-1	AP1G1	KVPELMEMFLPATK	14	1	1632.86	yes	yes	3		0.033949	46.68	339420
O43747	AP-1 complex subunit gamma-1	AP1G1	VLAINILGR	9	0	967.618	yes	yes	2		0.0027607	122.19	3894400
O43747	AP-1 complex subunit gamma-1	AP1G1	YVALTSLLK	9	0	1006.61	yes	yes	2		0.0040447	111.46	2837000
O60313	Dynamin-like 120 kDa protein	OPA1	AKNEILDEVISLSQVTPK	18	1	1983.09	yes	yes	3		0.040524	56.819	854830
O60313	Dynamin-like 120 kDa protein	OPA1	ESVEQQADSFK	11	0	1266.57	yes	yes	2		0.021283	75.739	757130
O60313	Dynamin-like 120 kDa protein	OPA1	GVEVDPSLIK	10	0	1055.59	yes	yes	2		0.019429	83.499	689160
O60313	Dynamin-like 120 kDa protein	OPA1	TSVLEMIAQAR	11	0	1217.64	yes	yes	2		0.00015461	147.28	582360
O60568	Procollagen-lysine,2-oxoglutarate 5-dioxygenase 3	PLOD3	LAGGYENVPTVDIHMK	16	0	1742.87	yes	yes	3		0.039966	56.46	1313100
O60568	Procollagen-lysine,2-oxoglutarate 5-dioxygenase 3	PLOD3	LVGPEEALSPGEAR	14	0	1423.73	yes	yes	2		0.025278	72.615	1033200
O60568	Procollagen-lysine,2-oxoglutarate 5-dioxygenase 3	PLOD3	SEDYVELVQR	10	0	1236.6	yes	yes	2		0.021606	65.241	750030
O60645	Exocyst complex component 3	EXOC3	YLKNEVEEGVSPSQPSMDGILDAIAK	26	1	2789.38	yes	yes	3		0.0012731	112.37	1118800	+
O60645	Exocyst complex component 3	EXOC3	AAIQSQLDGVR	11	0	1156.62	yes	yes	2		1.1299e-07	196.67	22180000
O60645	Exocyst complex component 3	EXOC3	DAVVQHSQLAAAVENLK	17	0	1791.95	yes	yes	2	3	4.1657e-16	220.1	24403000
O60645	Exocyst complex component 3	EXOC3	DDHIGALLAVR	11	0	1178.64	yes	yes	2		0.00027747	127.51	0
O60645	Exocyst complex component 3	EXOC3	DGLMYEQYR	9	0	1173.51	yes	yes	2		0.00048918	147.2	2376900
O60645	Exocyst complex component 3	EXOC3	DIQQSLADVSK	11	0	1202.61	yes	yes	2		2.5712e-07	182.25	13022000
O60645	Exocyst complex component 3	EXOC3	DPTLLVSVVR	10	0	1097.64	yes	yes	2		0.00032622	138.76	1871200
O60645	Exocyst complex component 3	EXOC3	EAVATAVQR	9	0	943.509	yes	yes	2		7.7948e-07	169.44	0
O60645	Exocyst complex component 3	EXOC3	ETDREAVATAVQR	13	1	1444.73	yes	yes	3		0.0010719	125.36	3186600
O60645	Exocyst complex component 3	EXOC3	ETQDLIEQGALLQAHR	16	0	1820.94	yes	yes	2	3	0.0015528	120.21	18954000
O60645	Exocyst complex component 3	EXOC3	IEGTQADTR	9	0	989.478	yes	yes	2		0.04521	72.848	96277
O60645	Exocyst complex component 3	EXOC3	KYVLDDLIVAK	11	1	1275.74	yes	yes	2	3	0.0010036	130.69	5818000
O60645	Exocyst complex component 3	EXOC3	LTDPSLLYLEVSTLVSK	17	0	1877.04	yes	yes	2	3	1.6288e-05	136.35	205680
O60645	Exocyst complex component 3	EXOC3	MFTILER	7	0	908.479	yes	yes	2		0.002717	135.77	6133800
O60645	Exocyst complex component 3	EXOC3	NEVEEGVSPSQPSMDGILDAIAK	23	0	2385.14	yes	yes	2	3	8.5057e-08	144.95	2861200
O60645	Exocyst complex component 3	EXOC3	NIFSVPEIVR	10	0	1172.66	yes	yes	2		3.5096e-05	155.33	14919000
O60645	Exocyst complex component 3	EXOC3	NLLNMYHQALSTR	13	0	1559.79	yes	yes	2	3	0.00029895	128.36	5903700
O60645	Exocyst complex component 3	EXOC3	QSINTIESLK	10	0	1131.61	yes	yes	2		0.029802	75.229	2026400
O60645	Exocyst complex component 3	EXOC3	QTIMETLEQGPAQASPSYVPLFK	23	0	2534.27	yes	yes	3		0.016877	66.467	0
O60645	Exocyst complex component 3	EXOC3	RDPTLLVSVVR	11	1	1253.75	yes	yes	2	3	0.0052817	91.123	11103000
O60645	Exocyst complex component 3	EXOC3	RVVVEYLR	8	1	1032.61	yes	yes	2		0.039474	78.264	1328600
O60645	Exocyst complex component 3	EXOC3	TGLSQLHNALNDVK	14	0	1508.79	yes	yes	2	3	2.3145e-08	192.32	24139000
O60645	Exocyst complex component 3	EXOC3	VAGMLQRPDQLDK	13	1	1469.77	yes	yes	2	3	0.0034722	136.3	8045600
O60645	Exocyst complex component 3	EXOC3	VAGMLQRPDQLDKVEQYR	18	2	2145.1	yes	yes	3		0.0080843	103.39	716400
O60645	Exocyst complex component 3	EXOC3	VVVEYLR	7	0	876.507	yes	yes	2		0.043582	79.451	12241000
O60645	Exocyst complex component 3	EXOC3	YKDEAQLYK	9	1	1156.58	yes	yes	2	3	0.0010684	134.26	2551900
O60645	Exocyst complex component 3	EXOC3	YKDEAQLYKEEHLR	14	2	1820.91	yes	yes	3	4	0.0024417	122.1	14063000
O60645	Exocyst complex component 3	EXOC3	YPDIRDDHIGALLAVR	16	1	1822.97	yes	yes	4		0.015938	79.875	1885500
O60645	Exocyst complex component 3	EXOC3	YVLDDLIVAK	10	0	1147.65	yes	yes	2		0.00084625	126.39	9019700
O75127	Pentatricopeptide repeat-containing protein 1, mitochondrial	PTCD1	LALIGGLEGFLSK	13	0	1316.77	yes	yes	2		0.0018135	117.7	267540
O75127	Pentatricopeptide repeat-containing protein 1, mitochondrial	PTCD1	LNYTYLISILK	11	0	1339.78	yes	yes	2		0.01413	84.352	309520
O75330	Hyaluronan mediated motility receptor	HMMR	ILSLELMK	8	0	945.557	yes	yes	2		0.0011937	147.29	23736000		+
O75330	Hyaluronan mediated motility receptor	HMMR	YDSMVQSLEDVTAQFESYK	19	0	2239	yes	yes	2	3	6.6319e-22	233.57	6666300	+	+
O75330	Hyaluronan mediated motility receptor	HMMR	ALTASEIEDLKLENSSLQEK	20	1	2217.14	yes	yes	2	3	2.4872e-28	284.84	6406900	+
O75330	Hyaluronan mediated motility receptor	HMMR	ITDLQNQLK	9	0	1071.59	yes	yes	2		0.036917	93.649	22712000	+
O75330	Hyaluronan mediated motility receptor	HMMR	TKPFQLQLDAFEVEK	15	1	1791.94	yes	yes	3		8.1566e-05	149.6	20664000	+
O75330	Hyaluronan mediated motility receptor	HMMR	NAEDVQHQILATESSNQEYVR	21	0	2430.14	yes	yes	2	3	1.062e-09	152.51	7586400	+
O75330	Hyaluronan mediated motility receptor	HMMR	ELQIDSLLQQEK	12	0	1442.76	yes	yes	2		6.1808e-15	243.37	2856500	+
O75330	Hyaluronan mediated motility receptor	HMMR	EHNENLNAEMQNLK	14	0	1682.77	yes	yes	2	3	6.0783e-49	350.18	17168000
O75330	Hyaluronan mediated motility receptor	HMMR	EITVSFLQK	9	0	1063.59	yes	yes	2		0.00052505	148.94	21675000
O75330	Hyaluronan mediated motility receptor	HMMR	ELSSSLHQK	9	0	1027.53	yes	yes	2		0.0031355	117.89	1314600
O75330	Hyaluronan mediated motility receptor	HMMR	ENTTAELTEEINK	13	0	1490.71	yes	yes	2	3	1.3254e-11	217.2	36032000
O75330	Hyaluronan mediated motility receptor	HMMR	FILEQQER	8	0	1061.55	yes	yes	2		0.03201	78.098	15706000
O75330	Hyaluronan mediated motility receptor	HMMR	GPVSFQK	7	0	761.407	yes	yes	2		0.02637	94.006	9773700
O75330	Hyaluronan mediated motility receptor	HMMR	IAQLEGK	7	0	757.433	yes	yes	2		0.021446	99.375	2101200
O75330	Hyaluronan mediated motility receptor	HMMR	IQDLETELEK	10	0	1216.62	yes	yes	2		5.5957e-10	217.22	25317000
O75330	Hyaluronan mediated motility receptor	HMMR	LDIAQLEENLK	11	0	1284.69	yes	yes	2		1.3995e-10	222.2	8784500
O75330	Hyaluronan mediated motility receptor	HMMR	LDIAQLEENLKEK	13	1	1541.83	yes	yes	3		0.017485	79.744	1789300
O75330	Hyaluronan mediated motility receptor	HMMR	LKDENSQLK	9	1	1073.57	yes	yes	3		0.020189	85.862	0
O75330	Hyaluronan mediated motility receptor	HMMR	LLGHQNLK	8	0	921.54	yes	yes	2		0.0028333	130.04	7320700
O75330	Hyaluronan mediated motility receptor	HMMR	LLYEELYNK	9	0	1183.61	yes	yes	2		4.3319e-09	218.73	25424000
O75330	Hyaluronan mediated motility receptor	HMMR	LQEELNK	7	0	872.46	yes	no	2		0.0027064	136.75	4590400
O75330	Hyaluronan mediated motility receptor	HMMR	MLLDLQTK	8	0	960.531	yes	yes	2		0.00038843	159.28	18582000
O75330	Hyaluronan mediated motility receptor	HMMR	NLFEEELKQTLDELDK	16	1	1962.98	yes	yes	2		0.0042198	119.48	191640
O75330	Hyaluronan mediated motility receptor	HMMR	QALLNEHGAAQEQLNK	16	0	1762.9	yes	yes	3		0.014097	74.296	5421700
O75330	Hyaluronan mediated motility receptor	HMMR	QNLNVDKDTTLPASAR	16	1	1741.9	yes	yes	3		0.00071856	123.63	6086100
O75330	Hyaluronan mediated motility receptor	HMMR	QSLEENIVILSK	12	0	1371.76	yes	yes	2		0.00036041	135.04	3596300
O75330	Hyaluronan mediated motility receptor	HMMR	QTLDELDKLQQK	12	1	1457.77	yes	yes	3		0.011367	87.568	1287100
O75330	Hyaluronan mediated motility receptor	HMMR	QVEDLNVK	8	0	943.497	yes	yes	2		0.035167	86.833	0
O75330	Hyaluronan mediated motility receptor	HMMR	SSAAHTQATLLLQEK	15	0	1596.85	yes	yes	2	3	6.3799e-27	282.09	31181000
O75330	Hyaluronan mediated motility receptor	HMMR	TSLSANNATLEK	12	0	1247.64	yes	yes	2		5.835e-08	185.2	26846000
O75330	Hyaluronan mediated motility receptor	HMMR	YKLDIAQLEENLK	13	1	1575.85	yes	yes	2	3	8.9581e-08	205.26	19666000
O75330	Hyaluronan mediated motility receptor	HMMR	YKLDIAQLEENLKEK	15	2	1832.99	yes	yes	3	4	5.9038e-05	168.67	5628600
O75400	Pre-mRNA-processing factor 40 homolog A	PRPF40A	FTNMLGQPGSTALDLFK	17	0	1838.92	yes	no	2		2.5378e-05	118.66	1773200
O75400	Pre-mRNA-processing factor 40 homolog A	PRPF40A	LAFNSLLEK	9	0	1033.58	yes	no	2		0.021583	91.658	874910
O75400	Pre-mRNA-processing factor 40 homolog A	PRPF40A	SDSGKPYYYNSQTK	14	1	1636.74	yes	no	3		0.025153	76.868	522410
O75448	Mediator of RNA polymerase II transcription subunit 24	MED24	GSVLQFMPFTTVSELVK	17	0	1881.99	yes	yes	2		4.0301e-05	132.9	627280		+
O75448	Mediator of RNA polymerase II transcription subunit 24	MED24	LGEILANLSNPQLR	14	0	1536.86	yes	yes	2		0.0059092	113.25	397070	+
O75448	Mediator of RNA polymerase II transcription subunit 24	MED24	AEPTVTNILK	10	0	1084.61	yes	yes	2		0.0012371	124.67	6213000
O75448	Mediator of RNA polymerase II transcription subunit 24	MED24	EGLEAGTPAAGEK	13	0	1228.59	yes	yes	2		0.00049443	134.18	2000100
O75448	Mediator of RNA polymerase II transcription subunit 24	MED24	EVLTDIFAK	9	0	1034.56	yes	yes	2		0.027088	79.489	2443300
O75448	Mediator of RNA polymerase II transcription subunit 24	MED24	FINLNEFTTYGSEESTKPASVR	22	1	2489.21	yes	yes	3		0.00094749	93.371	2961800
O75448	Mediator of RNA polymerase II transcription subunit 24	MED24	HREDIEDYISLFPLDDVQPSK	21	1	2515.22	yes	yes	3	4	0.010088	75.564	2418100
O75448	Mediator of RNA polymerase II transcription subunit 24	MED24	IPQVLVK	7	0	795.522	yes	yes	2		0.019947	100.07	1982200
O75448	Mediator of RNA polymerase II transcription subunit 24	MED24	LLSSNEDDANILSSPTDR	18	0	1945.92	yes	yes	2		1.6937e-16	225.69	1854000
O75448	Mediator of RNA polymerase II transcription subunit 24	MED24	SGENANIQPNIQLILR	16	0	1778.96	yes	yes	2		9.4474e-06	141.82	947320
O75448	Mediator of RNA polymerase II transcription subunit 24	MED24	SLDLLLAAAAATGK	14	0	1313.76	yes	yes	2		2.3717e-08	196.84	2235200
O75448	Mediator of RNA polymerase II transcription subunit 24	MED24	SPEGLLGVLGHMLSGK	16	0	1593.85	yes	yes	2	3	0.0012594	112.57	988460
O75448	Mediator of RNA polymerase II transcription subunit 24	MED24	VESLVALLNNSSEMK	15	0	1632.84	yes	yes	2	3	1.3755e-22	272.96	2264200
O75448	Mediator of RNA polymerase II transcription subunit 24	MED24	VVIMNSILER	10	0	1172.66	yes	yes	2		0.00081742	126.03	2653400
O75448	Mediator of RNA polymerase II transcription subunit 24	MED24	VVLAITDLSLPLGR	14	0	1465.89	yes	yes	2		0.022546	74.853	4816700
O94874	E3 UFM1-protein ligase 1	UFL1	AQFAEATQR	9	0	1020.5	yes	yes	2		0.030171	78.513	501510
O94874	E3 UFM1-protein ligase 1	UFL1	HVQLVLGQLIDENYLDR	17	0	2024.07	yes	yes	3		1.3904e-05	132.23	465370
O94874	E3 UFM1-protein ligase 1	UFL1	TYDLPGNFLTQALTQR	16	0	1836.94	yes	yes	2	3	4.5354e-12	210.67	984490
O94906	Pre-mRNA-processing factor 6	PRPF6	LEEANGNTQMVEK	13	0	1461.68	yes	yes	2		4.1193e-15	248.67	2069700	+	+
O94906	Pre-mRNA-processing factor 6	PRPF6	AAELETDIR	9	0	1016.51	yes	yes	2		0.0017327	128.86	11687000
O94906	Pre-mRNA-processing factor 6	PRPF6	AAVELEEPEDAR	12	0	1327.63	yes	yes	2		3.7884e-09	187.85	11744000
O94906	Pre-mRNA-processing factor 6	PRPF6	AEVLWLMGAK	10	0	1116.6	yes	yes	2		0.00040848	133.23	812200
O94906	Pre-mRNA-processing factor 6	PRPF6	AIYAYALQVFPSK	13	0	1469.79	yes	yes	2		0.00055055	126.1	1566500
O94906	Pre-mRNA-processing factor 6	PRPF6	ALEHVPNSVR	10	0	1120.6	yes	yes	3		0.041171	63.694	7245200
O94906	Pre-mRNA-processing factor 6	PRPF6	AVIGIGIEEEDRK	13	1	1427.76	yes	yes	2	3	0.00021607	147.96	10075000
O94906	Pre-mRNA-processing factor 6	PRPF6	AVVAQAVR	8	0	812.487	yes	yes	2		0.0037218	127.12	3228900
O94906	Pre-mRNA-processing factor 6	PRPF6	EAYNQGLK	8	0	921.456	yes	yes	2		0.026451	85.212	894040
O94906	Pre-mRNA-processing factor 6	PRPF6	ETNPHHPPAWIASAR	15	0	1682.83	yes	yes	3		0.00068339	106.3	0
O94906	Pre-mRNA-processing factor 6	PRPF6	FELQHGTEEQQEEVR	15	0	1857.85	yes	yes	3		6.522e-16	226.88	7548700
O94906	Pre-mRNA-processing factor 6	PRPF6	GYLTDLNSMIPTHGGDINDIKK	22	1	2401.19	yes	yes	3	4	0.00056161	90.385	4890100
O94906	Pre-mRNA-processing factor 6	PRPF6	HIWITAAK	8	0	938.534	yes	yes	2		0.033913	80.165	2114800
O94906	Pre-mRNA-processing factor 6	PRPF6	HYEDFPK	7	0	934.418	yes	yes	2		0.028734	87.323	3191900
O94906	Pre-mRNA-processing factor 6	PRPF6	IDSDLGDAWAFFYK	14	0	1646.76	yes	yes	2		5.446e-06	163.33	427620
O94906	Pre-mRNA-processing factor 6	PRPF6	IQQQFSDLK	9	0	1105.58	no	no			1	0
O94906	Pre-mRNA-processing factor 6	PRPF6	IQQQFSDLKR	10	1	1261.68	yes	yes	3		0.030473	56.013	3774600
O94906	Pre-mRNA-processing factor 6	PRPF6	KALEHVPNSVR	11	1	1248.69	yes	yes	3		0.009489	82.494	1534800
O94906	Pre-mRNA-processing factor 6	PRPF6	LESENDEYER	10	0	1282.53	yes	yes	2		3.8141e-06	175.74	5581500
O94906	Pre-mRNA-processing factor 6	PRPF6	LEWVQDNIR	9	0	1171.6	yes	yes	2		0.0013527	128.03	2290700
O94906	Pre-mRNA-processing factor 6	PRPF6	LTPVPDSFFAK	11	0	1220.64	yes	yes	2		0.012428	89.679	6600800
O94906	Pre-mRNA-processing factor 6	PRPF6	NIANTLMAK	9	0	974.522	yes	yes	2		0.0019316	128.35	6089700
O94906	Pre-mRNA-processing factor 6	PRPF6	NPGLWLESVR	10	0	1169.62	yes	yes	2		0.00011722	149.94	1444900
O94906	Pre-mRNA-processing factor 6	PRPF6	NTLMDMR	7	0	879.394	yes	yes	2		0.036187	82.75	1140200
O94906	Pre-mRNA-processing factor 6	PRPF6	SEDVWLEAAR	10	0	1174.56	yes	yes	2		0.00015092	147.74	1410800
O95782	AP-2 complex subunit alpha-1	AP2A1	ALLLSTYIK	9	0	1020.62	yes	no	2		0.00014023	164.46	11209000
O95782	AP-2 complex subunit alpha-1	AP2A1	ANHPMDAEVTK	11	0	1211.56	yes	yes	2	3	3.72e-06	174.57	2801100
O95782	AP-2 complex subunit alpha-1	AP2A1	DFLTPPLLSVR	11	0	1256.71	yes	yes	2		0.008284	94.82	3834200
O95782	AP-2 complex subunit alpha-1	AP2A1	EMGEAFAADIPR	12	0	1305.6	yes	yes	2		0.040426	67.997	1082900
O95782	AP-2 complex subunit alpha-1	AP2A1	FFQPTEMAAQDFFQR	15	0	1861.85	yes	yes	2	3	1.533e-05	140.68	2569800
O95782	AP-2 complex subunit alpha-1	AP2A1	FINLFPETK	9	0	1107.6	yes	yes	2		0.0044453	105.98	3730600
O95782	AP-2 complex subunit alpha-1	AP2A1	GPGAGSALDDGR	12	0	1071.49	yes	yes	2		0.0049177	104.59	986300
O95782	AP-2 complex subunit alpha-1	AP2A1	GPGAGSALDDGRR	13	1	1227.6	yes	yes	3		0.027168	63.624	836860
O95782	AP-2 complex subunit alpha-1	AP2A1	IAGDYVSEEVWYR	13	0	1585.74	yes	no	2		0.035317	63.727	610850
O95782	AP-2 complex subunit alpha-1	AP2A1	ILVAGDSMDSVK	12	0	1233.63	yes	yes	2		8.4954e-05	150.51	3410800
O95782	AP-2 complex subunit alpha-1	AP2A1	KGPGAGSALDDGR	13	1	1199.59	yes	yes	2	3	0.024947	83.856	2763700
O95782	AP-2 complex subunit alpha-1	AP2A1	LEPNAQAQMYR	11	0	1319.63	yes	yes	2		0.005907	96.756	2515800
O95782	AP-2 complex subunit alpha-1	AP2A1	LINNAIK	7	0	784.481	yes	no	2		0.044193	81.381	1399800
O95782	AP-2 complex subunit alpha-1	AP2A1	LLGFGSALLDNVDPNPENFVGAGIIQTK	28	0	2898.51	yes	yes	3		3.5867e-05	95.666	203900
O95782	AP-2 complex subunit alpha-1	AP2A1	MYLFYGNK	8	0	1034.49	yes	yes	2		0.0054467	111.04	1565800
O95782	AP-2 complex subunit alpha-1	AP2A1	NADVELQQR	9	0	1071.53	yes	no	2		0.0011625	132.88	5656800
O95782	AP-2 complex subunit alpha-1	AP2A1	NNGVLFENQLLQIGVK	16	0	1784.98	yes	yes	2		4.1414e-12	212.43	583090
O95782	AP-2 complex subunit alpha-1	AP2A1	SSPPVQFSLLHSK	13	0	1425.76	yes	yes	3		0.047777	55.899	3868200
O95782	AP-2 complex subunit alpha-1	AP2A1	THIDTVINALK	11	0	1223.69	yes	yes	2	3	9.9389e-05	149.94	12741000
O95782	AP-2 complex subunit alpha-1	AP2A1	TSVQFQNFSPTVVHPGDLQTQLAVQTK	27	0	2969.52	yes	yes	3		4.1605e-05	87.72	1263900
O95782	AP-2 complex subunit alpha-1	AP2A1	VGGYILGEFGNLIAGDPR	18	0	1846.96	yes	no	2	3	8.6555e-08	164.01	3889900
O95782	AP-2 complex subunit alpha-1	AP2A1	VLQIVTNR	8	0	941.566	yes	yes	2		0.00015613	147.29	0
O95782	AP-2 complex subunit alpha-1	AP2A1	YGGAPQALTLK	11	0	1117.61	yes	yes	2		0.048364	69.261	7700800
O95782	AP-2 complex subunit alpha-1	AP2A1	YLETADYAIR	10	0	1213.6	yes	yes	2		0.0027671	110.84	0
P07900	Heat shock protein HSP 90-alpha	HSP90AA1	ALLFVPR	7	0	814.507	yes	yes	2		0.007657	116	15840000
P07900	Heat shock protein HSP 90-alpha	HSP90AA1	APFDLFENR	9	0	1107.53	yes	yes	2		0.0024104	121.5	1756200
P07900	Heat shock protein HSP 90-alpha	HSP90AA1	DQVANSAFVER	11	0	1234.59	yes	yes	2		3.7612e-10	210.44	14889000
P07900	Heat shock protein HSP 90-alpha	HSP90AA1	ELHINLIPNK	10	0	1189.68	yes	no	2		0.048044	66.92	1131300
P07900	Heat shock protein HSP 90-alpha	HSP90AA1	ELHINLIPNKQDR	13	1	1588.87	yes	yes	3		0.042933	52.576	4065100
P07900	Heat shock protein HSP 90-alpha	HSP90AA1	ELISNSSDALDK	12	0	1290.63	yes	no	2		4.6754e-06	171.49	20376000
P07900	Heat shock protein HSP 90-alpha	HSP90AA1	FYEQFSK	7	0	947.439	yes	yes	2		0.027045	88.819	3350700
P07900	Heat shock protein HSP 90-alpha	HSP90AA1	HIYYITGETK	10	0	1223.62	yes	no	2		0.00011291	148.91	10107000
P07900	Heat shock protein HSP 90-alpha	HSP90AA1	HLEINPDHSIIETLR	15	0	1785.94	yes	yes	3		0.00012011	132.08	16946000
P07900	Heat shock protein HSP 90-alpha	HSP90AA1	HSQFIGYPITLFVEK	15	0	1777.94	yes	no	3		0.00044183	113.67	1842200
P07900	Heat shock protein HSP 90-alpha	HSP90AA1	LGIHEDSQNR	10	0	1167.56	yes	yes	2		0.0076863	97.452	799540
P07900	Heat shock protein HSP 90-alpha	HSP90AA1	NPDDITNEEYGEFYK	15	0	1832.77	yes	yes	2		1.1122e-42	343.7	6062500
P07900	Heat shock protein HSP 90-alpha	HSP90AA1	RAPFDLFENR	10	1	1263.64	yes	yes	2	3	0.023119	78.342	2577800
P07900	Heat shock protein HSP 90-alpha	HSP90AA1	TDTGEPMGR	9	0	962.413	yes	yes	2		0.028181	80.755	410870
P07900	Heat shock protein HSP 90-alpha	HSP90AA1	YYTSASGDEMVSLK	14	0	1549.7	yes	yes	2		1.9649e-15	228.17	1668900
P08238	Heat shock protein HSP 90-beta	HSP90AB1	ADLINNLGTIAK	12	0	1241.7	no	no	2		2.7456e-08	195.77	55879000	+
P08238	Heat shock protein HSP 90-beta	HSP90AB1	ADHGEPIGR	9	0	950.457	yes	yes	2		0.012705	97.965	233220
P08238	Heat shock protein HSP 90-beta	HSP90AB1	ALLFIPR	7	0	828.522	yes	yes	2		0.010208	109.7	19719000
P08238	Heat shock protein HSP 90-beta	HSP90AB1	APFDLFENK	9	0	1079.53	yes	no	2		0.0025658	120.99	1275600
P08238	Heat shock protein HSP 90-beta	HSP90AB1	APFDLFENKK	10	1	1207.62	yes	no	3		0.04778	41.704	733990
P08238	Heat shock protein HSP 90-beta	HSP90AB1	DNSTMGYMMAK	11	0	1247.5	yes	no	2		5.5183e-08	199.82	1107300
P08238	Heat shock protein HSP 90-beta	HSP90AB1	EDQTEYLEER	10	0	1310.56	no	no	2		1.8026e-13	236.69	25032000
P08238	Heat shock protein HSP 90-beta	HSP90AB1	EGLELPEDEEEK	12	0	1415.63	no	no	2		0.00057323	124.6	2975600
P08238	Heat shock protein HSP 90-beta	HSP90AB1	EGLELPEDEEEKK	13	1	1543.73	no	no	3		0.046742	35.523	1630700
P08238	Heat shock protein HSP 90-beta	HSP90AB1	ELISNASDALDK	12	0	1274.64	no	no	2		1.1291e-31	308.58	35074000
P08238	Heat shock protein HSP 90-beta	HSP90AB1	EQVANSAFVER	11	0	1248.61	yes	no	2		0.00048488	129.74	18731000
P08238	Heat shock protein HSP 90-beta	HSP90AB1	FYEAFSK	7	0	890.417	yes	yes	2		0.048725	76.774	6820500
P08238	Heat shock protein HSP 90-beta	HSP90AB1	GVVDSEDLPLNISR	14	0	1512.78	no	no	2		9.8479e-12	218.6	69113000
P08238	Heat shock protein HSP 90-beta	HSP90AB1	HLEINPDHPIVETLR	15	0	1781.94	yes	yes	3		5.7471e-06	153.14	11923000
P08238	Heat shock protein HSP 90-beta	HSP90AB1	IDIIPNPQER	10	0	1193.64	yes	no	2		0.019801	79.659	8089700
P08238	Heat shock protein HSP 90-beta	HSP90AB1	KHLEINPDHPIVETLR	16	1	1910.04	yes	yes	4		0.014644	65.038	8439800
P08238	Heat shock protein HSP 90-beta	HSP90AB1	LGIHEDSTNR	10	0	1140.55	yes	yes	2	3	0.00034637	136.49	13410000
P08238	Heat shock protein HSP 90-beta	HSP90AB1	LGIHEDSTNRR	11	1	1296.65	yes	yes	3		0.014771	74.841	472950
P08238	Heat shock protein HSP 90-beta	HSP90AB1	NPDDITQEEYGEFYK	15	0	1846.79	yes	yes	2		5.5517e-42	333.66	7607400
P08238	Heat shock protein HSP 90-beta	HSP90AB1	RAPFDLFENK	10	1	1235.63	yes	no	2		0.012553	92.112	2193900
P08238	Heat shock protein HSP 90-beta	HSP90AB1	RLSELLR	7	1	885.54	yes	yes	2		0.0087028	116.9	2005800
P08238	Heat shock protein HSP 90-beta	HSP90AB1	SIYYITGESK	10	0	1159.58	no	no	2		2.0105e-05	166.69	14912000
P08238	Heat shock protein HSP 90-beta	HSP90AB1	SLTNDWEDHLAVK	13	0	1526.74	no	no	2	3	1.6203e-11	214.61	25667000
P08238	Heat shock protein HSP 90-beta	HSP90AB1	TLTLVDTGIGMTK	13	0	1348.73	yes	yes	2		3.0155e-20	267.37	34289000
P08238	Heat shock protein HSP 90-beta	HSP90AB1	VILHLKEDQTEYLEER	16	1	2014.04	no	no	3		8.7011e-05	135.61	3538100
P08238	Heat shock protein HSP 90-beta	HSP90AB1	YESLTDPSK	9	0	1038.49	no	no	2		0.0029263	119.22	13924000
P08238	Heat shock protein HSP 90-beta	HSP90AB1	YESLTDPSKLDSGK	14	1	1538.75	no	no	3		0.025922	71.513	2847100
P08238	Heat shock protein HSP 90-beta	HSP90AB1	YHTSQSGDEMTSLSEYVSR	19	0	2175.94	yes	yes	3		1.0977e-06	135.79	12978000
P08238	Heat shock protein HSP 90-beta	HSP90AB1	YIDQEELNK	9	0	1150.55	no	no	2		1.7364e-06	194.94	28180000
P09874	Poly [ADP-ribose] polymerase 1	PARP1	TTNFAGILSQGLR	13	0	1376.74	yes	yes	2	3	6.5879e-08	182.02	23054000	+
P09874	Poly [ADP-ribose] polymerase 1	PARP1	VVSEDFLQDVSASTK	15	0	1623.8	yes	yes	2		2.0189e-12	234.63	1901600	+
P09874	Poly [ADP-ribose] polymerase 1	PARP1	AEPVEVVAPR	10	0	1065.58	yes	yes	2		0.0011619	125.75	33319000
P09874	Poly [ADP-ribose] polymerase 1	PARP1	AMVEYEIDLQK	11	0	1337.65	yes	yes	2		9.7973e-05	147.28	3073600
P09874	Poly [ADP-ribose] polymerase 1	PARP1	AQNDLIWNIK	10	0	1213.65	yes	yes	2		0.027979	73.951	700140
P09874	Poly [ADP-ribose] polymerase 1	PARP1	AQNDLIWNIKDELKK	15	2	1826.99	yes	yes	3	4	0.035608	69.456	8968100
P09874	Poly [ADP-ribose] polymerase 1	PARP1	DSEEAEIIR	9	0	1060.5	yes	yes	2		0.00092824	138.98	1446000
P09874	Poly [ADP-ribose] polymerase 1	PARP1	EDAIEHFMK	9	0	1118.51	yes	yes	2		0.002459	120.87	1597300
P09874	Poly [ADP-ribose] polymerase 1	PARP1	ELLIFNK	7	0	875.512	yes	yes	2		0.031887	85.359	21656000
P09874	Poly [ADP-ribose] polymerase 1	PARP1	FYTLIPHDFGMK	12	0	1467.72	yes	yes	2	3	9.6919e-06	160.18	13382000
P09874	Poly [ADP-ribose] polymerase 1	PARP1	GFSLLATEDK	10	0	1079.55	yes	yes	2		1.0373e-06	161.51	0
P09874	Poly [ADP-ribose] polymerase 1	PARP1	GGAAVDPDSGLEHSAHVLEK	20	0	1987.96	yes	yes	4		0.027276	50.966	19327000
P09874	Poly [ADP-ribose] polymerase 1	PARP1	GGSDDSSKDPIDVNYEK	17	1	1824.8	yes	yes	2	3	3.1295e-08	191.36	17478000
P09874	Poly [ADP-ribose] polymerase 1	PARP1	GIYFADMVSK	10	0	1129.55	yes	yes	2		0.0020314	117.02	6466100
P09874	Poly [ADP-ribose] polymerase 1	PARP1	HPDVEVDGFSELR	13	0	1498.71	yes	yes	2	3	1.2771e-05	149.41	5827600
P09874	Poly [ADP-ribose] polymerase 1	PARP1	IAPPEAPVTGYMFGK	15	0	1576.8	yes	yes	2		0.04057	64.374	5135400
P09874	Poly [ADP-ribose] polymerase 1	PARP1	KFYPLEIDYGQDEEAVK	17	1	2042.98	yes	yes	3		2.7636e-05	132.25	4700300
P09874	Poly [ADP-ribose] polymerase 1	PARP1	KFYPLEIDYGQDEEAVKK	18	2	2171.08	yes	yes	3		8.7764e-07	175.19	6898100
P09874	Poly [ADP-ribose] polymerase 1	PARP1	KGDEVDGVDEVAK	13	1	1359.65	yes	yes	2		0.0062649	103.79	2921400
P09874	Poly [ADP-ribose] polymerase 1	PARP1	KPPLLNNADSVQAK	14	1	1493.82	yes	yes	2	3	2.2086e-08	188.96	27092000
P09874	Poly [ADP-ribose] polymerase 1	PARP1	LEQMPSKEDAIEHFMK	16	1	1931.91	yes	yes	3		0.0027902	102.64	5581300
P09874	Poly [ADP-ribose] polymerase 1	PARP1	LQLLEDDKENR	11	1	1371.7	yes	yes	2	3	4.6369e-05	174.23	6896700
P09874	Poly [ADP-ribose] polymerase 1	PARP1	MAIMVQSPMFDGK	13	0	1453.68	yes	yes	2		0.01258	85.837	601800
P09874	Poly [ADP-ribose] polymerase 1	PARP1	MIFDVESMK	9	0	1098.51	yes	yes	2		0.02263	81.525	3671500
P09874	Poly [ADP-ribose] polymerase 1	PARP1	MIFDVESMKK	10	1	1226.6	yes	yes	3		0.00049299	128.28	3417500
P09874	Poly [ADP-ribose] polymerase 1	PARP1	MVDPEKPQLGMIDR	14	1	1627.81	yes	yes	3		0.017291	78.615	5516400
P09874	Poly [ADP-ribose] polymerase 1	PARP1	NREELGFRPEYSASQLK	17	2	2023.01	yes	yes	3		0.0063241	109.48	5817100
P09874	Poly [ADP-ribose] polymerase 1	PARP1	NTHATTHNAYDLEVIDIFK	19	0	2201.08	yes	yes	3	4	3.9705e-09	161.1	13285000
P09874	Poly [ADP-ribose] polymerase 1	PARP1	PVQDLIK	7	0	811.48	yes	yes	2		0.0021715	144.38	11807000
P09874	Poly [ADP-ribose] polymerase 1	PARP1	QQVPSGESAILDR	13	0	1398.71	yes	yes	2		0.0001156	145.6	3712500
P09874	Poly [ADP-ribose] polymerase 1	PARP1	RKGDEVDGVDEVAK	14	2	1515.75	yes	yes	3		0.0032469	127.03	8102200
P09874	Poly [ADP-ribose] polymerase 1	PARP1	TLGDFAAEYAK	11	0	1184.57	yes	yes	2		0.0003404	138.63	13829000
P09874	Poly [ADP-ribose] polymerase 1	PARP1	VFSATLGLVDIVK	13	0	1360.8	yes	yes	2	3	4.4105e-11	202.32	10784000
P09874	Poly [ADP-ribose] polymerase 1	PARP1	VGTVIGSNK	9	0	873.492	yes	yes	2		0.0049906	109.83	4972000
P09874	Poly [ADP-ribose] polymerase 1	PARP1	VVDRDSEEAEIIR	13	1	1529.77	yes	yes	2	3	0.00017201	146.36	20127000
P09874	Poly [ADP-ribose] polymerase 1	PARP1	VVDRDSEEAEIIRK	14	2	1657.86	yes	yes	3		0.0031353	123.95	3320800
P11171	Protein 4.1	EPB41	TLNINGQIPTGEGPPLVK	18	0	1847.02	yes	yes	2		8.6308e-12	210.57	2469800	+
P11171	Protein 4.1	EPB41	ERLDGENIYIR	11	1	1376.7	yes	yes	3		0.048492	44.543	2539400
P11171	Protein 4.1	EPB41	FLALGSK	7	0	734.433	yes	yes	2		0.041624	83.753	2150700
P11171	Protein 4.1	EPB41	FYPPDPAQLTEDITR	15	0	1761.86	no	no	2		0.024245	68.978	3879000
P11171	Protein 4.1	EPB41	GVPWNFTFNVK	11	0	1307.67	yes	yes	2		0.029633	71.268	512590
P11171	Protein 4.1	EPB41	IRPGEQEQYESTIGFK	16	1	1880.93	yes	yes	3		5.9728e-05	145.7	4372300
P11171	Protein 4.1	EPB41	KLSMYGVDLHK	11	1	1289.68	yes	yes	3		0.00048744	128.36	1360900
P11171	Protein 4.1	EPB41	LSMYGVDLHK	10	0	1161.59	yes	yes	2		0.00088451	125.74	547970
P11171	Protein 4.1	EPB41	LSTHSPFR	8	0	943.488	yes	yes	2		0.033543	80.219	1719700
P11171	Protein 4.1	EPB41	PTSAPAITQGQVAEGGVLDASAK	23	0	2167.11	yes	yes	3		0.020588	64.069	1093600
P11171	Protein 4.1	EPB41	SLDGAAAVDSADR	13	0	1246.58	yes	yes	2		6.9326e-08	184.11	4629200
P11171	Protein 4.1	EPB41	SMTPAQADLEFLENAK	16	0	1763.84	yes	yes	3		0.0050562	85.976	1122900
P11171	Protein 4.1	EPB41	SPRPTSAPAITQGQVAEGGVLDASAK	26	1	2507.3	yes	yes	3		1.0848e-05	128.4	2298700
P11171	Protein 4.1	EPB41	TQTVTISDNANAVK	14	0	1460.75	yes	yes	2		5.9395e-21	269.88	8975700
P11171	Protein 4.1	EPB41	TWLDSAK	7	0	819.413	yes	yes	2		0.033827	85.265	704730
P11171	Protein 4.1	EPB41	VVVHQETEIADE	12	0	1367.66	yes	yes	2		0.00020276	142.1	4686200
P13010	X-ray repair cross-complementing protein 5	XRCC5	FFMGNQVLK	9	0	1082.56	yes	yes	2		2.5889e-06	190.52	25540000		+
P13010	X-ray repair cross-complementing protein 5	XRCC5	HLMLPDFDLLEDIESK	16	0	1913.94	yes	yes	2	3	1.0683e-11	206.66	4902000		+
P13010	X-ray repair cross-complementing protein 5	XRCC5	VITMFVQR	8	0	992.548	yes	yes	2		0.00012421	176.09	15848000		+
P13010	X-ray repair cross-complementing protein 5	XRCC5	YAPTEAQLNAVDALIDSMSLAK	22	0	2320.16	yes	yes	2	3	6.9725e-06	136.53	10941000	+	+
P13010	X-ray repair cross-complementing protein 5	XRCC5	DQVTAQEIFQDNHEDGPTAK	20	0	2242.01	yes	yes	3		4.4083e-05	111.73	31740000	+
P13010	X-ray repair cross-complementing protein 5	XRCC5	SQLDIIIHSLK	11	0	1265.73	yes	yes	2	3	1.9668e-14	251.75	59059000	+
P13010	X-ray repair cross-complementing protein 5	XRCC5	AFREEAIK	8	1	962.519	yes	yes	2		0.009866	137.13	11416000
P13010	X-ray repair cross-complementing protein 5	XRCC5	ANPQVGVAFPHIK	13	0	1376.76	yes	yes	2	3	1.5155e-05	157.03	21430000
P13010	X-ray repair cross-complementing protein 5	XRCC5	EDGSGDRGDGPFR	13	1	1363.58	yes	yes	2	3	0.0082492	96.82	6158300
P13010	X-ray repair cross-complementing protein 5	XRCC5	EDIIQGFR	8	0	976.498	yes	yes	2		0.0013671	143.89	7405600
P13010	X-ray repair cross-complementing protein 5	XRCC5	EEASGSSVTAEEAKK	15	1	1521.72	yes	yes	2	3	1.1983e-06	180.95	7555500
P13010	X-ray repair cross-complementing protein 5	XRCC5	EPLPPIQQHIWNMLNPPAEVTTK	23	0	2652.37	yes	yes	3		0.0011312	76.015	3879300
P13010	X-ray repair cross-complementing protein 5	XRCC5	HIEIFTDLSSR	11	0	1316.67	yes	yes	2		0.00021004	142.08	29037000
P13010	X-ray repair cross-complementing protein 5	XRCC5	KVITMFVQR	9	1	1120.64	yes	yes	2	3	0.002026	128.35	6086200
P13010	X-ray repair cross-complementing protein 5	XRCC5	KYAPTEAQLNAVDALIDSMSLAK	23	1	2448.26	yes	yes	2	3	0.0003316	97.49	8000500
P13010	X-ray repair cross-complementing protein 5	XRCC5	LGGHGPSFPLK	11	0	1108.6	yes	yes	2	3	0.0014299	123.75	67775000
P13010	X-ray repair cross-complementing protein 5	XRCC5	LTIGSNLSIR	10	0	1072.62	yes	yes	2		9.5287e-08	204.56	29687000
P13010	X-ray repair cross-complementing protein 5	XRCC5	RFFMGNQVLK	10	1	1238.66	yes	yes	2		0.04166	72.243	1203600
P13010	X-ray repair cross-complementing protein 5	XRCC5	RHIEIFTDLSSR	12	1	1472.77	yes	yes	3		0.0012062	103.14	0
P13010	X-ray repair cross-complementing protein 5	XRCC5	SQLDIIIHSLKK	12	1	1393.83	yes	yes	3		0.00089761	116.71	19810000
P13010	X-ray repair cross-complementing protein 5	XRCC5	TDTLEDLFPTTK	12	0	1379.68	yes	yes	2		1.689e-08	196.02	34378000
P13010	X-ray repair cross-complementing protein 5	XRCC5	TLFPLIEAK	9	0	1030.61	yes	yes	2		0.012225	96.665	51196000
P13010	X-ray repair cross-complementing protein 5	XRCC5	TWTVVDAK	8	0	918.481	yes	yes	2		0.043544	76.17	8928200
P13010	X-ray repair cross-complementing protein 5	XRCC5	YGSDIVPFSK	10	0	1111.56	yes	yes	2		0.00099477	126.03	16607000
P13639	Elongation factor 2	EEF2	GEGQLGPAER	10	0	1012.49	yes	yes	2		0.010082	97.779	612800
P13639	Elongation factor 2	EEF2	VFDAIMNFK	9	0	1083.54	yes	yes	2		0.0067197	105.52	0
P13639	Elongation factor 2	EEF2	VFSGLVSTGLK	11	0	1106.63	yes	yes	2		0.025343	77.597	1313100
P17480	Nucleolar transcription factor 1	UBTF	FLESLPEEEQQR	12	0	1503.72	yes	yes	2		0.00034478	132.56	961510
P17480	Nucleolar transcription factor 1	UBTF	TLTELILDAQEHVK	14	0	1608.87	yes	yes	3		0.009659	81.239	2223300
P18074	TFIIH basal transcription factor complex helicase XPD subunit	ERCC2	ETDAHLANPVLPDEVLQEAVPGSIR	25	0	2669.37	yes	yes	3		2.7585e-05	94.671	1614900
P18074	TFIIH basal transcription factor complex helicase XPD subunit	ERCC2	TAEHFLGFLR	10	0	1189.62	yes	yes	3		0.0018746	109.44	1045600
P19447	TFIIH basal transcription factor complex helicase XPB subunit	ERCC3	EDDKIVDLNFLIGPK	15	1	1714.91	yes	yes	3		5.7082e-07	187.11	4537500
P19447	TFIIH basal transcription factor complex helicase XPB subunit	ERCC3	EEQQQLLQK	9	0	1142.59	yes	yes	2		2.5193e-12	234.47	5602200
P19447	TFIIH basal transcription factor complex helicase XPB subunit	ERCC3	FLVDQGYSFK	10	0	1202.6	yes	yes	2		0.00055047	127.51	3643700
P19447	TFIIH basal transcription factor complex helicase XPB subunit	ERCC3	ILLYTMNPNK	10	0	1205.65	yes	yes	2		0.00098314	123.86	1331200
P19447	TFIIH basal transcription factor complex helicase XPB subunit	ERCC3	IVDLNFLIGPK	11	0	1227.72	yes	yes	2		0.0004035	134.38	976660
P19447	TFIIH basal transcription factor complex helicase XPB subunit	ERCC3	LAGMEEEDLAFSTK	14	0	1539.71	yes	yes	2		1.5884e-12	222.81	3428000
P19447	TFIIH basal transcription factor complex helicase XPB subunit	ERCC3	LGLTATLVR	9	0	942.586	yes	yes	2		0.0078771	104.42	7423500
P19447	TFIIH basal transcription factor complex helicase XPB subunit	ERCC3	LNKPYIYGPTSQGER	15	1	1721.87	yes	yes	3		5.0906e-06	164.2	3733300
P19447	TFIIH basal transcription factor complex helicase XPB subunit	ERCC3	NDSVNPDINIDLKPTAVLRPYQEK	24	2	2738.42	yes	yes	3	4	0.00047678	115.02	10696000
P19447	TFIIH basal transcription factor complex helicase XPB subunit	ERCC3	NSEGEATELITETFTSK	17	0	1855.87	yes	yes	2	3	1.9626e-43	343.22	13590000
P19447	TFIIH basal transcription factor complex helicase XPB subunit	ERCC3	TGVPDGIMQFIK	12	0	1304.68	yes	yes	2		1.0154e-05	163.45	3687300
P19447	TFIIH basal transcription factor complex helicase XPB subunit	ERCC3	VLAATDLDAEEEVVAGEFGSR	21	0	2177.05	yes	yes	2	3	4.9592e-23	247.36	9490800
P27448	MAP/microtubule affinity-regulating kinase 3	MARK3	AENLLLDADMNIK	13	0	1458.74	no	no	2		1.8219e-05	151.22	1311900
P27448	MAP/microtubule affinity-regulating kinase 3	MARK3	DLKAENLLLDADMNIK	16	1	1814.94	no	no	3		0.041246	55.097	613360
P27448	MAP/microtubule affinity-regulating kinase 3	MARK3	ENSTIPDQR	9	0	1058.5	yes	yes	2		0.038889	73.885	606250
P27448	MAP/microtubule affinity-regulating kinase 3	MARK3	FLVLNPIK	8	0	942.59	yes	yes	2		0.0051994	114.78	4501600
P27448	MAP/microtubule affinity-regulating kinase 3	MARK3	GTLEQIMK	8	0	918.484	no	no	2		0.039406	84.615	0
P27448	MAP/microtubule affinity-regulating kinase 3	MARK3	IANELKL	7	1	799.48	no	no	2		0.0084948	119.29	9038100
P27448	MAP/microtubule affinity-regulating kinase 3	MARK3	LFEVIETEK	9	0	1106.59	no	no	2		0.0010262	135.43	8179600
P27448	MAP/microtubule affinity-regulating kinase 3	MARK3	LSLNGVR	7	0	757.445	no	no	2		0.021446	99.375	2478800
P27448	MAP/microtubule affinity-regulating kinase 3	MARK3	SSELDASDSSSSSNLSLAK	19	0	1883.86	yes	yes	2		6.9353e-29	290.92	1971600
P27448	MAP/microtubule affinity-regulating kinase 3	MARK3	SSTVPSSNTASGGMTR	16	0	1538.7	yes	yes	2		0.0050641	93.495	1531700
P27448	MAP/microtubule affinity-regulating kinase 3	MARK3	TPLPTVNER	9	0	1025.55	yes	no	2		0.046075	71.614	2313100
P27448	MAP/microtubule affinity-regulating kinase 3	MARK3	TQLNPTSLQK	10	0	1128.61	yes	no	2		2.1114e-05	166.69	2037500
P27448	MAP/microtubule affinity-regulating kinase 3	MARK3	VRPSSDLNNSTGQSPHHK	18	1	1959.95	yes	yes	3	4	0.00015956	129.42	1742000
P27448	MAP/microtubule affinity-regulating kinase 3	MARK3	WINAGHEEDELKPFVEPELDISDQK	25	1	2937.4	yes	yes	4		0.017081	63.522	904660
P27448	MAP/microtubule affinity-regulating kinase 3	MARK3	YDEITATYLLLGR	13	0	1526.8	yes	yes	2		5.3104e-08	182.25	593930
P33991	DNA replication licensing factor MCM4	MCM4	NLNPEDIDQLITISGMVIR	19	0	2140.12	yes	yes	2	3	1.6219e-06	136.68	926130		+
P33991	DNA replication licensing factor MCM4	MCM4	ALADDDFLTVTGK	13	0	1364.68	yes	yes	2		0.0001623	144.51	4486700
P33991	DNA replication licensing factor MCM4	MCM4	DMFEEALR	8	0	1009.45	yes	yes	2		0.001546	140.35	2039100
P33991	DNA replication licensing factor MCM4	MCM4	GILLQLFGGTR	11	0	1173.69	yes	yes	2		0.0002754	142.19	1665700
P33991	DNA replication licensing factor MCM4	MCM4	LASALAPSIYEHEDIKK	17	1	1884	yes	yes	3	4	0.00042995	113.53	8510700
P33991	DNA replication licensing factor MCM4	MCM4	LHGLDEEAEQK	11	0	1267.6	yes	yes	2		0.0023488	112.94	1423800
P33991	DNA replication licensing factor MCM4	MCM4	LQESPEDMPAGQTPHTVILFAHNDLVDK	28	0	3101.51	yes	yes	4		0.048707	23.389	1439800
P33991	DNA replication licensing factor MCM4	MCM4	LSNKVEAIDVEEAK	14	1	1543.81	yes	yes	3		0.001756	115.1	1264400
P33991	DNA replication licensing factor MCM4	MCM4	LSNKVEAIDVEEAKR	15	2	1699.91	yes	yes	3	4	0.010211	98.943	8730900
P33991	DNA replication licensing factor MCM4	MCM4	RLHGLDEEAEQK	12	1	1423.71	yes	yes	3		1.7989e-05	158.01	2619100
P33991	DNA replication licensing factor MCM4	MCM4	SQLLQYVYNLVPR	13	0	1591.87	yes	yes	2	3	0.0038262	97.463	790720
P33991	DNA replication licensing factor MCM4	MCM4	SVLHEVMEQQTLSIAK	16	0	1811.95	yes	yes	2		2.6882e-12	213.69	1167000
P33991	DNA replication licensing factor MCM4	MCM4	THIDVIHYR	9	0	1152.6	yes	yes	3		0.00068148	134.77	10285000
P33991	DNA replication licensing factor MCM4	MCM4	TTIENIQLPHTLLSR	15	0	1734.96	yes	yes	3		0.0011865	107.35	2300500
P33991	DNA replication licensing factor MCM4	MCM4	VNVTGIYR	8	0	920.508	yes	yes	2		0.010563	104.01	3013800
P33992	DNA replication licensing factor MCM5	MCM5	LAALPNVYEVISK	13	0	1415.8	yes	yes	2		0.0076035	93.228	1886200
P33992	DNA replication licensing factor MCM5	MCM5	LQPFATEADVEEALR	15	0	1687.84	yes	yes	2		3.9688e-06	149.97	0
P33992	DNA replication licensing factor MCM5	MCM5	SFAGAVSPQEEEEFRR	16	1	1837.86	yes	yes	3		0.017926	64.224	1326800
P33992	DNA replication licensing factor MCM5	MCM5	VLGIQVDTDGSGR	13	0	1315.67	yes	yes	2		0.011751	90.229	833680
P33993	DNA replication licensing factor MCM7	MCM7	IAQPGDHVSVTGIFLPILR	19	0	2032.15	yes	yes	3		1.1059e-06	139.08	5820600	+
P33993	DNA replication licensing factor MCM7	MCM7	AGILTTLNAR	10	0	1028.6	yes	yes	2		0.00023414	146.11	9166800
P33993	DNA replication licensing factor MCM7	MCM7	ALLLLLVGGVDQSPR	15	0	1549.92	yes	yes	2		0.00045537	123.76	474460
P33993	DNA replication licensing factor MCM7	MCM7	DVLDVYIEHR	10	0	1257.64	yes	yes	2		0.00043807	128.01	2872100
P33993	DNA replication licensing factor MCM7	MCM7	EKQPMVPESLADYITAAYVEMR	22	1	2540.23	yes	yes	3		0.016327	65.184	252160
P33993	DNA replication licensing factor MCM7	MCM7	FDLLWLIQDRPDR	13	1	1685.89	yes	yes	3		0.0065107	91.123	377190
P33993	DNA replication licensing factor MCM7	MCM7	FLQEFYQDDELGKK	14	1	1758.85	yes	yes	3		0.0033605	91.712	4961700
P33993	DNA replication licensing factor MCM7	MCM7	GSSGVGLTAAVLR	13	0	1186.67	yes	yes	2		0.00058892	131.32	9887000
P33993	DNA replication licensing factor MCM7	MCM7	LAASIAPEIYGHEDVKK	17	1	1839.97	yes	yes	3	4	0.0055662	85.837	12755000
P33993	DNA replication licensing factor MCM7	MCM7	LAQHITYVHQHSR	13	0	1588.82	yes	yes	3	4	0.00024253	131.08	10487000
P33993	DNA replication licensing factor MCM7	MCM7	LFADAVQELLPQYK	14	0	1633.87	no	no			1	0
P33993	DNA replication licensing factor MCM7	MCM7	MQEHSDQVPVGNIPR	15	0	1705.82	yes	yes	3		0.036038	57.414	4219800
P33993	DNA replication licensing factor MCM7	MCM7	MVDVVEKEDVNEAIR	15	1	1744.87	yes	yes	3		5.2938e-05	155.43	5598900
P33993	DNA replication licensing factor MCM7	MCM7	PADVIFATVR	10	0	1087.6	yes	yes	2		0.018195	84.479	988630
P33993	DNA replication licensing factor MCM7	MCM7	QVVQGLLSETYLEAHR	16	0	1841.96	yes	yes	3		0.00060503	109.14	1976300
P33993	DNA replication licensing factor MCM7	MCM7	SEDDESGAGELTR	13	0	1364.57	yes	yes	2		8.2367e-08	177.36	4314700
P33993	DNA replication licensing factor MCM7	MCM7	SITVLVEGENTR	12	0	1316.69	yes	yes	2		3.1081e-20	273.24	4458200
P33993	DNA replication licensing factor MCM7	MCM7	SLEQNIQLPAALLSR	15	0	1651.93	yes	yes	2		5.1851e-08	176.08	5864800
P33993	DNA replication licensing factor MCM7	MCM7	SPQNQYPAELMR	12	0	1432.68	yes	yes	2		0.00039298	132.14	2267200
P33993	DNA replication licensing factor MCM7	MCM7	SQLLSYIDR	9	0	1093.58	yes	yes	2		0.0034808	113.67	11042000
P33993	DNA replication licensing factor MCM7	MCM7	TAIHEVMEQQTISIAK	16	0	1797.93	yes	yes	3		4.9571e-06	146.84	5026600
P33993	DNA replication licensing factor MCM7	MCM7	TLLAILR	7	0	798.533	yes	yes	2		0.02268	97.068	10602000
P33993	DNA replication licensing factor MCM7	MCM7	TQRPADVIFATVR	13	1	1472.81	yes	yes	2	3	0.0176	92.269	10283000
P33993	DNA replication licensing factor MCM7	MCM7	YGNQLVR	7	0	848.45	yes	yes	2		0.0035088	133.47	1942900
P40939	Trifunctional enzyme subunit alpha, mitochondrial;Long-chain enoyl-CoA hydratase;Long chain 3-hydroxyacyl-CoA dehydrogenase	HADHA	ADMVIEAVFEDLSLK	15	0	1678.85	yes	yes	2	3	0.0025888	110.84	183800		+
P40939	Trifunctional enzyme subunit alpha, mitochondrial;Long-chain enoyl-CoA hydratase;Long chain 3-hydroxyacyl-CoA dehydrogenase	HADHA	DLNSDMDSILASLK	14	0	1520.74	yes	yes	2		1.0599e-15	238.64	4700300		+
P40939	Trifunctional enzyme subunit alpha, mitochondrial;Long-chain enoyl-CoA hydratase;Long chain 3-hydroxyacyl-CoA dehydrogenase	HADHA	DATLTALDR	9	0	974.503	yes	yes	2		0.0021886	126.39	4040900
P40939	Trifunctional enzyme subunit alpha, mitochondrial;Long-chain enoyl-CoA hydratase;Long chain 3-hydroxyacyl-CoA dehydrogenase	HADHA	DGPGFYTTR	9	0	1012.46	yes	yes	2		0.041478	73.887	1675500
P40939	Trifunctional enzyme subunit alpha, mitochondrial;Long-chain enoyl-CoA hydratase;Long chain 3-hydroxyacyl-CoA dehydrogenase	HADHA	DSIFSNLTGQLDYQGFEK	18	0	2060.97	yes	yes	2	3	7.1197e-35	302.9	1774700
P40939	Trifunctional enzyme subunit alpha, mitochondrial;Long-chain enoyl-CoA hydratase;Long chain 3-hydroxyacyl-CoA dehydrogenase	HADHA	DTSASAVAVGLK	12	0	1117.6	yes	yes	2		4.4513e-11	208.17	2715800
P40939	Trifunctional enzyme subunit alpha, mitochondrial;Long-chain enoyl-CoA hydratase;Long chain 3-hydroxyacyl-CoA dehydrogenase	HADHA	FGELVMTK	8	0	923.479	yes	yes	2		0.0054534	113.66	1548900
P40939	Trifunctional enzyme subunit alpha, mitochondrial;Long-chain enoyl-CoA hydratase;Long chain 3-hydroxyacyl-CoA dehydrogenase	HADHA	FGGGNPELLTQMVSK	15	0	1576.79	yes	yes	2		3.2141e-08	185.14	5105200
P40939	Trifunctional enzyme subunit alpha, mitochondrial;Long-chain enoyl-CoA hydratase;Long chain 3-hydroxyacyl-CoA dehydrogenase	HADHA	FVDLYGAQK	9	0	1039.53	yes	yes	2		0.00099728	123.86	0
P40939	Trifunctional enzyme subunit alpha, mitochondrial;Long-chain enoyl-CoA hydratase;Long chain 3-hydroxyacyl-CoA dehydrogenase	HADHA	GFYIYQEGVK	10	0	1202.6	yes	yes	2		0.0023245	112.85	2687000
P40939	Trifunctional enzyme subunit alpha, mitochondrial;Long-chain enoyl-CoA hydratase;Long chain 3-hydroxyacyl-CoA dehydrogenase	HADHA	GQQQVFK	7	0	833.44	yes	yes	2		0.032881	85.359	372570
P40939	Trifunctional enzyme subunit alpha, mitochondrial;Long-chain enoyl-CoA hydratase;Long chain 3-hydroxyacyl-CoA dehydrogenase	HADHA	ILQEGVDPK	9	0	997.544	yes	yes	2		0.019407	88.134	5731000
P40939	Trifunctional enzyme subunit alpha, mitochondrial;Long-chain enoyl-CoA hydratase;Long chain 3-hydroxyacyl-CoA dehydrogenase	HADHA	LTAYAMTIPFVR	12	0	1381.74	yes	yes	2		0.020598	74.392	454770
P40939	Trifunctional enzyme subunit alpha, mitochondrial;Long-chain enoyl-CoA hydratase;Long chain 3-hydroxyacyl-CoA dehydrogenase	HADHA	MGLVDQLVEPLGPGLKPPEER	21	1	2273.21	yes	yes	3		0.00054756	108.45	3374500
P40939	Trifunctional enzyme subunit alpha, mitochondrial;Long-chain enoyl-CoA hydratase;Long chain 3-hydroxyacyl-CoA dehydrogenase	HADHA	MQLLEIITTEK	11	0	1317.72	yes	yes	2		1.0919e-07	193.15	10790000
P40939	Trifunctional enzyme subunit alpha, mitochondrial;Long-chain enoyl-CoA hydratase;Long chain 3-hydroxyacyl-CoA dehydrogenase	HADHA	MVGVPAALDMMLTGR	15	0	1560.78	yes	yes	2		0.041351	58.824	1344800
P40939	Trifunctional enzyme subunit alpha, mitochondrial;Long-chain enoyl-CoA hydratase;Long chain 3-hydroxyacyl-CoA dehydrogenase	HADHA	SEVSSDEDIQFR	12	0	1410.63	yes	yes	2		4.7744e-08	184.87	2588600
P40939	Trifunctional enzyme subunit alpha, mitochondrial;Long-chain enoyl-CoA hydratase;Long chain 3-hydroxyacyl-CoA dehydrogenase	HADHA	THINYGVK	8	0	930.492	yes	yes	2		0.010324	104.06	1069500
P40939	Trifunctional enzyme subunit alpha, mitochondrial;Long-chain enoyl-CoA hydratase;Long chain 3-hydroxyacyl-CoA dehydrogenase	HADHA	TVLGTPEVLLGALPGAGGTQR	21	0	2006.12	yes	yes	3		1.0498e-05	129.89	3738100
P50416	Carnitine O-palmitoyltransferase 1, liver isoform	CPT1A	AAFFVTLDETEEGYR	15	0	1746.81	yes	yes	2		0.032563	60.549	334590
P50416	Carnitine O-palmitoyltransferase 1, liver isoform	CPT1A	AGNAIHAILLYR	12	0	1310.75	yes	yes	2		0.00045867	132.17	1166700
P50416	Carnitine O-palmitoyltransferase 1, liver isoform	CPT1A	AMVDPAQTVEQR	12	0	1343.65	yes	yes	2		0.0003554	135.94	2083200
P50416	Carnitine O-palmitoyltransferase 1, liver isoform	CPT1A	EAMTDIITLFGLSSNSK	17	0	1825.91	yes	yes	2	3	1.6468e-16	233.48	1365800
P50416	Carnitine O-palmitoyltransferase 1, liver isoform	CPT1A	EMEQQMQR	8	0	1078.45	yes	yes	2		0.023263	85.212	266450
P50416	Carnitine O-palmitoyltransferase 1, liver isoform	CPT1A	EVLSEPWR	8	0	1014.51	yes	yes	2		0.0048085	115.49	1241200
P50416	Carnitine O-palmitoyltransferase 1, liver isoform	CPT1A	GDINPNIPYPTR	12	0	1355.68	yes	yes	2		0.0003227	137.09	5020100
P50416	Carnitine O-palmitoyltransferase 1, liver isoform	CPT1A	ILDNTSEPQPGEAR	14	0	1525.74	yes	yes	2		1.5445e-15	233.28	10039000
P50416	Carnitine O-palmitoyltransferase 1, liver isoform	CPT1A	IPGEETDTIQHMR	13	0	1525.72	yes	yes	3		0.0011001	113.95	3062000
P50416	Carnitine O-palmitoyltransferase 1, liver isoform	CPT1A	LAALTAGDR	9	0	886.487	yes	yes	2		0.00033859	129.85	0
P50416	Carnitine O-palmitoyltransferase 1, liver isoform	CPT1A	LPVPAVK	7	0	722.469	yes	yes	2		0.025421	95.957	4546800
P50416	Carnitine O-palmitoyltransferase 1, liver isoform	CPT1A	MTALAQDFAVGLGPR	15	0	1545.8	yes	yes	2		0.00044755	124.25	1629000
P50416	Carnitine O-palmitoyltransferase 1, liver isoform	CPT1A	SFTFVVFK	8	0	973.527	yes	yes	2		0.005253	113.71	1254300
P50416	Carnitine O-palmitoyltransferase 1, liver isoform	CPT1A	YLAVESPFLK	10	0	1165.64	yes	yes	2		0.0031139	107.21	2694000
P50416	Carnitine O-palmitoyltransferase 1, liver isoform	CPT1A	YLQSVRPLMK	10	1	1233.69	yes	yes	3		0.038342	63.076	1011000
P53618	Coatomer subunit beta	COPB1	VLQDLVMDILR	11	0	1313.74	yes	yes	2		0.0021637	113.24	172790
P53618	Coatomer subunit beta	COPB1	YEAAGTLVTLSSAPTAIK	18	0	1791.96	yes	yes	2		0.0018431	111.11	340890
P55072	Transitional endoplasmic reticulum ATPase	VCP	IVSQLLTLMDGLK	13	0	1429.82	yes	yes	2		0.00019166	135.86	0
P55072	Transitional endoplasmic reticulum ATPase	VCP	LDQLIYIPLPDEK	13	0	1555.85	yes	yes	2		0.0086042	89.358	0
P55072	Transitional endoplasmic reticulum ATPase	VCP	NAPAIIFIDELDAIAPK	17	0	1809.99	yes	yes	2		0.018178	76.526	284440
P55884	Eukaryotic translation initiation factor 3 subunit B	EIF3B	GTQGVVTNFEIFR	13	0	1466.75	yes	yes	2		6.6565e-06	165.51	1306800
P55884	Eukaryotic translation initiation factor 3 subunit B	EIF3B	VNLFTDFDK	9	0	1097.54	yes	yes	2		0.004283	107.45	1064700
P63010	AP-2 complex subunit beta	AP2B1	LASQANIAQVLAELK	15	0	1567.89	yes	no	2	3	3.2532e-16	241.42	2888000	+
P63010	AP-2 complex subunit beta	AP2B1	ALQHMTDFAIQFNK	14	0	1662.82	yes	yes	3		9.9125e-06	152.47	3376100
P63010	AP-2 complex subunit beta	AP2B1	APEVSQYIYQVYDSILK	17	0	2015.03	yes	yes	2	3	9.7608e-06	133.95	653950
P63010	AP-2 complex subunit beta	AP2B1	APEVSQYIYQVYDSILKN	18	1	2129.07	yes	yes	3		0.0055028	79.347	332600
P63010	AP-2 complex subunit beta	AP2B1	DIPNENELQFQIK	13	0	1586.79	yes	yes	2		0.00031407	132.97	1579200
P63010	AP-2 complex subunit beta	AP2B1	DSDYYNMLLK	10	0	1260.57	yes	yes	2		1.9326e-07	195.36	2016200
P63010	AP-2 complex subunit beta	AP2B1	EYATEVDVDFVR	12	0	1441.67	yes	no	2		3.5686e-09	182.41	0
P63010	AP-2 complex subunit beta	AP2B1	FLELLPK	7	0	858.521	yes	yes	2		0.031229	86.472	5184600
P63010	AP-2 complex subunit beta	AP2B1	IQPGNPNYTLSLK	13	0	1443.77	yes	yes	2		0.002848	107.65	3203100
P63010	AP-2 complex subunit beta	AP2B1	KPSETQELVQQVLSLATQDSDNPDLR	26	1	2910.46	yes	yes	3		0.0007126	84.127	754530
P63010	AP-2 complex subunit beta	AP2B1	LAPPLVTLLSGEPEVQYVALR	21	0	2264.28	yes	yes	2	3	4.0041e-05	108.97	1784400
P63010	AP-2 complex subunit beta	AP2B1	LHDINAQMVEDQGFLDSLR	19	0	2200.06	yes	yes	3		1.5361e-12	190.46	5642700
P63010	AP-2 complex subunit beta	AP2B1	LLSTDPVTAK	10	0	1043.59	yes	yes	2		0.013844	91.701	14814000
P63010	AP-2 complex subunit beta	AP2B1	LQNNNVYTIAK	11	0	1276.68	yes	yes	2		0.00027463	139.76	5158800
P63010	AP-2 complex subunit beta	AP2B1	LSHANSAVVLSAVK	14	0	1394.79	yes	no	2	3	1.7876e-05	155.26	11626000
P63010	AP-2 complex subunit beta	AP2B1	LVYLYLMNYAK	11	0	1389.74	yes	no	2		0.00064682	122.96	317920
P63010	AP-2 complex subunit beta	AP2B1	MEPLNNLQVAVK	12	0	1354.73	yes	no	2		0.013353	85.554	913990
P63010	AP-2 complex subunit beta	AP2B1	NINLIVQK	8	0	940.571	yes	no	2		0.00023075	169.06	6338800
P63010	AP-2 complex subunit beta	AP2B1	NVEGQDMLYQSLK	13	0	1523.73	yes	no	2		1.5839e-08	193.51	2681500
Q01780	Exosome component 10	EXOSC10	AAAEQAISVR	10	0	1014.55	yes	yes	2		0.00035481	138.99	1877500
Q01780	Exosome component 10	EXOSC10	ERPQDRPEDLDVPPALADFIHQQR	24	2	2841.42	yes	yes	4		0.00034657	112.14	1463500
Q01780	Exosome component 10	EXOSC10	IRPLPEEMLSYAR	13	1	1573.83	yes	yes	3		0.01677	79.744	1469400
Q01780	Exosome component 10	EXOSC10	IYEISNR	7	0	893.461	yes	yes	2		0.010262	108.09	1197000
Q01780	Exosome component 10	EXOSC10	KAQNIMESFENPFR	14	1	1709.82	yes	yes	3		0.0068753	108.66	454610
Q01780	Exosome component 10	EXOSC10	MFLPSLGHR	9	0	1056.55	yes	yes	3		0.0069147	98.629	2058100
Q01780	Exosome component 10	EXOSC10	NQQPVLPAGLQVPK	14	0	1487.85	yes	yes	2		0.0028994	107.17	1376500
Q01780	Exosome component 10	EXOSC10	SDMYILNESLTDPAIVK	17	0	1907.95	yes	yes	2		1.7422e-16	230.97	1196300
Q01780	Exosome component 10	EXOSC10	TEDFIIDTLELR	12	0	1463.75	yes	yes	2		1.8414e-08	193.49	922190
Q01780	Exosome component 10	EXOSC10	VGILLDEASGVNK	13	0	1313.72	yes	yes	2		5.2231e-08	187.62	2559800
Q02241	Kinesin-like protein KIF23	KIF23	ALLQEFDNAVLSK	13	0	1446.77	yes	yes	2		2.8742e-11	209.22	3314100
Q02241	Kinesin-like protein KIF23	KIF23	EAGNINQSLMTLR	13	0	1445.73	yes	yes	2		0.001421	117.27	1316800
Q02241	Kinesin-like protein KIF23	KIF23	ELFDVVANPLVNDLIHGK	18	0	1992.07	yes	yes	2	3	0.00013485	113.14	1611400
Q02241	Kinesin-like protein KIF23	KIF23	FAEVTQEVEVARPVDK	16	1	1815.94	yes	yes	3		0.0058477	96.707	3510400
Q02241	Kinesin-like protein KIF23	KIF23	LVQAPLDADGDNVLQEK	17	0	1823.93	yes	yes	2		6.1308e-05	131.37	1949400
Q02241	Kinesin-like protein KIF23	KIF23	TTTIYEEDKR	10	1	1254.61	yes	yes	2		0.011681	93.442	420900
Q02809	Procollagen-lysine,2-oxoglutarate 5-dioxygenase 1	PLOD1	FLLEYIAPMTEK	12	0	1453.75	yes	yes	2		0.0029435	105.65	451240
Q02809	Procollagen-lysine,2-oxoglutarate 5-dioxygenase 1	PLOD1	IFQNLDGALDEVVLK	15	0	1672.9	yes	yes	3		0.019206	67.102	0
Q02809	Procollagen-lysine,2-oxoglutarate 5-dioxygenase 1	PLOD1	SEDYVDIVQGR	11	0	1279.6	yes	yes	2		0.04217	76.165	783610
Q08945	FACT complex subunit SSRP1	SSRP1	FYVPPTQEDGVDPVEAFAQNVLSK	24	0	2649.3	yes	yes	2	3	0.0020001	76.889	963840	+
Q08945	FACT complex subunit SSRP1	SSRP1	VDNIQAGELTEGIWR	15	0	1699.85	yes	yes	2		1.7768e-11	205.66	6938400	+
Q08945	FACT complex subunit SSRP1	SSRP1	ASSGLLYPLER	11	0	1204.65	yes	yes	2		0.0037951	103.44	13737000
Q08945	FACT complex subunit SSRP1	SSRP1	GFIYVHKPPVHIR	13	1	1561.89	yes	yes	3	4	0.0034574	107.06	22497000
Q08945	FACT complex subunit SSRP1	SSRP1	IKSDHPGISITDLSK	15	1	1609.87	yes	yes	3		0.0090418	89.466	5176300
Q08945	FACT complex subunit SSRP1	SSRP1	IPYTTVLR	8	0	961.56	yes	yes	2		0.0058744	110.12	20107000
Q08945	FACT complex subunit SSRP1	SSRP1	LFDFVNAK	8	0	952.502	yes	yes	2		0.0014146	143.73	16381000
Q08945	FACT complex subunit SSRP1	SSRP1	LFLLPHK	7	0	866.538	yes	yes	2		0.0026534	137.5	10461000
Q08945	FACT complex subunit SSRP1	SSRP1	NMSGSLYEMVSR	12	0	1372.61	yes	yes	2		7.2714e-08	177.36	6782200
Q08945	FACT complex subunit SSRP1	SSRP1	SDHPGISITDLSK	13	0	1368.69	yes	yes	2	3	0.0019737	115.37	20988000
Q08945	FACT complex subunit SSRP1	SSRP1	SFDFEIETK	9	0	1114.52	yes	yes	2		0.00062437	145.25	3057700
Q09161	Nuclear cap-binding protein subunit 1	NCBP1	ATNDEIFSILK	11	0	1249.66	yes	yes	2		2.1652e-07	184.87	3012800
Q09161	Nuclear cap-binding protein subunit 1	NCBP1	DGVLEEQIER	10	0	1186.58	yes	yes	2		0.026274	84.479	0
Q09161	Nuclear cap-binding protein subunit 1	NCBP1	IFANTESYLK	10	0	1184.61	yes	yes	2		0.0004184	130.98	1654200
Q09161	Nuclear cap-binding protein subunit 1	NCBP1	NLFLVIFQR	9	0	1148.67	yes	yes	2		0.0018328	124.92	162270
Q09161	Nuclear cap-binding protein subunit 1	NCBP1	NYNFGGEFVEAMIR	14	0	1645.76	yes	yes	2		0.0027893	104.09	413180
Q12788	Transducin beta-like protein 3	TBL3	DVTEAEQAEEQAR	13	0	1474.65	yes	yes	2		5.4736e-20	253.97	1072500
Q12788	Transducin beta-like protein 3	TBL3	GTQLLSSGSDGLVK	14	0	1360.72	yes	yes	2		0.0010669	122.12	1346000
Q12788	Transducin beta-like protein 3	TBL3	LDDHALTGASDSR	13	0	1356.63	yes	yes	3		0.0071031	90.861	1304200
Q12788	Transducin beta-like protein 3	TBL3	LLATGSQDR	9	0	959.504	yes	yes	2		0.048317	72.243	475470
Q12788	Transducin beta-like protein 3	TBL3	LPVPAAAPTPWETHK	15	0	1613.86	yes	yes	3		0.024483	64.798	970440
Q12788	Transducin beta-like protein 3	TBL3	VNILEVASGAVLR	13	0	1339.78	yes	yes	2		9.8984e-05	147.7	1462800
Q12797	Aspartyl/asparaginyl beta-hydroxylase	ASPH	GAIETYQEVASLPDVPADLLK	21	0	2228.16	yes	yes	2		0.0021044	84.371	556980
Q12797	Aspartyl/asparaginyl beta-hydroxylase	ASPH	IAESIPYLK	9	0	1032.59	yes	yes	2		0.039674	74.173	1056500
Q13214	Semaphorin-3B	SEMA3B	AEEAAPAAPPGPK	13	0	1204.61	yes	yes	2		0.012292	92.19	2517600
Q13214	Semaphorin-3B	SEMA3B	DFLQLVEPGGGGSANSLR	18	0	1815.91	yes	yes	2		0.00012211	119.51	648030
Q13214	Semaphorin-3B	SEMA3B	ETAVEAAPALGR	12	0	1183.62	yes	yes	2		0.0036524	107.09	1931900
Q13214	Semaphorin-3B	SEMA3B	LSLHVLSATQAER	13	0	1423.78	yes	yes	3		0.011258	81.239	2771500
Q13214	Semaphorin-3B	SEMA3B	RHQLYVASR	9	1	1128.62	yes	yes	3		0.039791	47.302	292690
Q13330	Metastasis-associated protein MTA1	MTA1	DFTDIQQDFLPWK	13	0	1651.79	yes	yes	2		0.0072498	91.202	0
Q13330	Metastasis-associated protein MTA1	MTA1	DISSTLIALADK	12	0	1245.68	yes	yes	2		0.0020899	116.71	1750100
Q13330	Metastasis-associated protein MTA1	MTA1	DITLFHAMDTLHK	13	0	1540.77	yes	yes	3		0.0095749	81.676	1104000
Q13330	Metastasis-associated protein MTA1	MTA1	SVSSVLSSLTPAK	13	0	1274.71	yes	yes	2		0.015878	85.837	462240
Q13428	Treacle protein	TCOF1	KTGPAAAQVQVGK	13	1	1253.71	yes	no	3		0.070865	59.227	253480
Q13428	Treacle protein	TCOF1	NPQNSTVLAR	10	0	1098.58	yes	no	2		0.0032133	117.52	350110
Q13619	Cullin-4A	CUL4A	EDSLDSVLFLK	11	0	1264.66	yes	no	2		0.0178	80.834	427590
Q13619	Cullin-4A	CUL4A	ETVEEQVSTTER	12	0	1406.65	yes	yes	2		2.7572e-05	148.89	1818900
Q13619	Cullin-4A	CUL4A	PAALAAAPAKPGGAGGSK	18	1	1490.82	yes	yes	3		0.029109	77.746	1299300
Q13619	Cullin-4A	CUL4A	SIFLFLDR	8	0	1009.56	yes	no	2		0.0016357	138.98	803770
Q13619	Cullin-4A	CUL4A	SLLGMLSDLQVYK	13	0	1465.79	yes	yes	2		2.2166e-08	193	754200
Q13619	Cullin-4A	CUL4A	TFGTAIVINPEK	12	0	1288.7	yes	yes	2		0.044293	56.139	735170
Q13619	Cullin-4A	CUL4A	TIDGILLLIER	11	0	1254.75	yes	no	2		1.8288e-07	187.85	1029900
Q13619	Cullin-4A	CUL4A	TLGHNLLVSELYNQLK	16	0	1841	yes	yes	3		0.0030071	86.777	1268800
Q13724	Mannosyl-oligosaccharide glucosidase	MOGS	LAGSLLTQALESHAEGFR	18	0	1898.98	yes	yes	3		5.737e-05	123.76	3268300
Q13724	Mannosyl-oligosaccharide glucosidase	MOGS	LGPLLDILADSR	12	0	1281.73	yes	yes	2		0.021763	75.102	258520
Q13724	Mannosyl-oligosaccharide glucosidase	MOGS	VDPALFPPVPLFTAVPSR	18	0	1922.07	yes	yes	2	3	0.0032059	87.388	657600
Q14974	Importin subunit beta-1	KPNB1	AAVENLPTFLVELSR	15	0	1657.9	yes	yes	2		0.0037514	95.873	836200
Q14974	Importin subunit beta-1	KPNB1	GALQYLVPILTQTLTK	16	0	1758.03	yes	yes	3		0.036777	57.414	110580
Q14974	Importin subunit beta-1	KPNB1	LAATNALLNSLEFTK	15	0	1604.88	yes	yes	2		6.8767e-27	280.5	1748200
Q14974	Importin subunit beta-1	KPNB1	SDYDMVDYLNELR	13	0	1631.71	yes	yes	2		0.0013549	113.25	294050
Q14974	Importin subunit beta-1	KPNB1	SNEILTAIIQGMR	13	0	1444.77	yes	yes	2	3	2.4345e-11	211.83	917670
Q14974	Importin subunit beta-1	KPNB1	SSAYESLMEIVK	12	0	1355.66	yes	yes	2		0.00010942	146.5	982460
Q14974	Importin subunit beta-1	KPNB1	VAALQNLVK	9	0	954.586	yes	yes	2		0.022812	84.743	1368400
Q14974	Importin subunit beta-1	KPNB1	VLANPGNSQVAR	12	0	1224.66	yes	yes	2		0.0066742	98.368	949360
Q15022	Polycomb protein SUZ12	SUZ12	IFYQFLYNNNTR	12	0	1591.78	yes	yes	2		3.735e-11	200.93	1109300	+
Q15022	Polycomb protein SUZ12	SUZ12	ALETDSVSGVSK	12	0	1191.6	yes	yes	2		6.3326e-08	184.87	7734700
Q15022	Polycomb protein SUZ12	SUZ12	ASMSEFLESEDGEVEQQR	18	0	2069.88	yes	yes	2		1.6155e-22	260.56	1305800
Q15022	Polycomb protein SUZ12	SUZ12	ATWETILDGK	10	0	1132.58	yes	yes	2		0.00023592	143.5	2134800
Q15022	Polycomb protein SUZ12	SUZ12	ESLTTDLQTR	10	0	1162.58	yes	yes	2		0.017124	84.198	7200900
Q15022	Polycomb protein SUZ12	SUZ12	FIFNYVYHPK	10	0	1326.68	yes	yes	3		0.0048713	94.309	3307000
Q15022	Polycomb protein SUZ12	SUZ12	HGGGGGGGSGPSAGSGGGGFGGSAAVAAATASGGK	35	0	2629.19	yes	yes	3		1.7261e-13	178.23	3474000
Q15022	Polycomb protein SUZ12	SUZ12	NLIAPIFLHR	10	0	1192.71	yes	yes	2	3	0.00079704	125.71	10201000
Q15022	Polycomb protein SUZ12	SUZ12	SYSLLFR	7	0	884.476	yes	yes	2		0.003926	130.77	2965500
Q15022	Polycomb protein SUZ12	SUZ12	TFVAQMTVFDK	11	0	1285.64	yes	yes	2		0.00016159	145.29	2131100
Q15022	Polycomb protein SUZ12	SUZ12	TITQIEEFSDVNEGEK	16	0	1837.86	yes	yes	2		4.4657e-51	351.46	1702500
Q15022	Polycomb protein SUZ12	SUZ12	TITQIEEFSDVNEGEKEVMK	20	1	2325.1	yes	yes	3		2.9131e-05	123.76	5515600
Q15542	Transcription initiation factor TFIID subunit 5	TAF5	EAGLLEEAVAGSGAPGEVDSAGAEVTSALLSR	32	0	3012.49	yes	yes	3		0.0086058	73.389	685630
Q15542	Transcription initiation factor TFIID subunit 5	TAF5	FLATGATDGR	10	0	1007.5	yes	yes	2		0.00019013	149.33	1522900
Q15542	Transcription initiation factor TFIID subunit 5	TAF5	ILYGHSGPVYGASFSPDR	18	0	1921.93	yes	yes	3		0.0016952	92.8	1190500
Q15542	Transcription initiation factor TFIID subunit 5	TAF5	NYLLSSSEDGTVR	13	0	1439.69	yes	yes	2		0.0039738	100.11	627220
Q16891	Mitochondrial inner membrane protein	IMMT	AVDEAADALLK	11	0	1114.59	yes	yes	2		0.0034342	108.35	1845200
Q16891	Mitochondrial inner membrane protein	IMMT	ELDSITPEVLPGWK	14	0	1582.82	yes	yes	2		0.0013234	115.12	1040900
Q16891	Mitochondrial inner membrane protein	IMMT	ERPPEEVAAR	10	1	1152.59	yes	yes	2	3	0.024613	112.83	3469500
Q16891	Mitochondrial inner membrane protein	IMMT	EVAGAKPHITAAEGK	15	1	1477.79	yes	yes	3		0.024261	77.204	4161300
Q16891	Mitochondrial inner membrane protein	IMMT	GIEQAVQSHAVAEEEAR	17	0	1822.88	yes	yes	3		0.0018921	94.569	4059300
Q16891	Mitochondrial inner membrane protein	IMMT	LFEMVLGPAAYNVPLPK	17	0	1858.01	yes	yes	2		0.037944	60.489	304180
Q16891	Mitochondrial inner membrane protein	IMMT	LHNMIVDLDNVVK	13	0	1508.8	yes	yes	2	3	0.0006042	122.97	2434500
Q16891	Mitochondrial inner membrane protein	IMMT	SEFEQNLSEK	10	0	1209.55	yes	yes	2		2.0898e-07	195.83	2898900
Q16891	Mitochondrial inner membrane protein	IMMT	SLEDALR	7	0	802.418	yes	yes	2		0.041362	82.241	1981500
Q16891	Mitochondrial inner membrane protein	IMMT	TSSAETPTIPLGSAVEAIK	19	0	1870.99	yes	yes	2		9.1212e-05	119.51	2628500
Q16891	Mitochondrial inner membrane protein	IMMT	VVSQYHELVVQAR	13	0	1526.82	yes	yes	2	3	0.00040805	127.36	3688200
Q16891	Mitochondrial inner membrane protein	IMMT	YSTSGSSGLTTGK	13	0	1244.59	yes	yes	2		0.0146	88.224	1559700
Q2NL82	Pre-rRNA-processing protein TSR1 homolog	TSR1	ISLPEAMQLLQDR	13	0	1512.8	yes	yes	2		0.034125	64.104	238010
Q2NL82	Pre-rRNA-processing protein TSR1 homolog	TSR1	LEEMFPDEVDTPR	13	0	1576.71	yes	yes	2		0.0084804	88.224	1364400
Q2NL82	Pre-rRNA-processing protein TSR1 homolog	TSR1	LLLLDTQQEAGMLLR	15	0	1712.95	yes	yes	2		2.5285e-11	199.33	401750
Q2NL82	Pre-rRNA-processing protein TSR1 homolog	TSR1	MSVLNMVVR	9	0	1047.56	yes	yes	2		0.00070806	144.77	776140
Q5BJF6	Outer dense fiber protein 2	ODF2	KNIDLTAIISDLR	13	1	1470.84	yes	yes	3		0.025086	60.196	486680
Q5BJF6	Outer dense fiber protein 2	ODF2	NIDLTAIISDLR	12	0	1342.75	yes	yes	2		0.0049517	99.834	0
Q5BJF6	Outer dense fiber protein 2	ODF2	REEAIHQSQLR	11	1	1365.71	yes	yes	3		0.0079951	81.525	328600
Q6NSJ5	Leucine-rich repeat-containing protein 8E	LRRC8E	AGLLVEDTLYQGLPAEVR	18	0	1943.04	yes	yes	2		2.0101e-07	160.76	472240
Q6NSJ5	Leucine-rich repeat-containing protein 8E	LRRC8E	EVPLWVFGLR	10	0	1214.68	yes	yes	2		0.0026742	109.66	373390
Q6NSJ5	Leucine-rich repeat-containing protein 8E	LRRC8E	GIPEQIGALQEVK	13	0	1380.76	yes	yes	2		0.0033757	105.58	1812600
Q6NSJ5	Leucine-rich repeat-containing protein 8E	LRRC8E	GLEELHLEGLFPQELAR	17	0	1950.02	yes	yes	3		0.0079619	78.191	843210
Q6NSJ5	Leucine-rich repeat-containing protein 8E	LRRC8E	IEHFISILGK	10	0	1155.67	no	no	3		0.0078158	92.239	1547800
Q6NSJ5	Leucine-rich repeat-containing protein 8E	LRRC8E	TLLLGDNQLSQLSPHVGALR	20	0	2131.18	yes	yes	3		2.6563e-05	121.45	1710600
Q6NSJ5	Leucine-rich repeat-containing protein 8E	LRRC8E	VPASVTDVAGHLQR	14	0	1448.77	yes	yes	3		0.0024763	103.14	2158800
Q6NSJ5	Leucine-rich repeat-containing protein 8E	LRRC8E	VVTEPPVVTLLDKK	14	1	1536.91	yes	yes	3		0.03175	51.612	759270
Q6SJ93	Protein FAM111B	FAM111B	SLNDEKLETYDEEK	14	1	1711.78	yes	yes	3		0.045655	45.722	1853900
Q6SJ93	Protein FAM111B	FAM111B	VSNENLDYAILK	12	0	1377.71	yes	yes	2		6.5014e-08	179.83	2478800
Q6SJ93	Protein FAM111B	FAM111B	YAINLDVQK	9	0	1062.57	yes	yes	2		0.00069842	144.65	1334100
Q7KZI7	Serine/threonine-protein kinase MARK2	MARK2	DQQNLPYGVTPASPSGHSQGR	21	0	2195.04	yes	yes	3		0.00084041	93.371	1486400
Q7KZI7	Serine/threonine-protein kinase MARK2	MARK2	DTEQPTLGHLDSKPSSK	17	1	1838.9	yes	yes	3		0.020764	75.316	2043400
Q7KZI7	Serine/threonine-protein kinase MARK2	MARK2	NSATSADEQPHIGNYR	16	0	1758.79	yes	yes	3		0.00018945	119.88	2175900
Q7KZI7	Serine/threonine-protein kinase MARK2	MARK2	PSADLTNSSAPSPSHK	16	0	1594.76	yes	yes	3		0.00011614	132.23	5552700
Q7KZI7	Serine/threonine-protein kinase MARK2	MARK2	TPLPTLNER	9	0	1039.57	yes	yes	2		0.026806	79.489	1732500
Q7KZI7	Serine/threonine-protein kinase MARK2	MARK2	TQLNSSSLQK	10	0	1104.58	yes	yes	2		0.014321	89.561	905670
Q7KZI7	Serine/threonine-protein kinase MARK2	MARK2	TTPTPSTNSVLSTSTNR	17	0	1762.87	yes	yes	2		1.8966e-08	166.9	1652000
Q7KZI7	Serine/threonine-protein kinase MARK2	MARK2	VPASPLPGLER	11	0	1134.64	yes	yes	2		0.0084757	97.472	1473400
Q7KZI7	Serine/threonine-protein kinase MARK2	MARK2	VPVASPSAHNISSSGGAPDR	20	0	1904.93	yes	yes	3		5.6544e-07	139.11	5294500
Q8IWT6	Leucine-rich repeat-containing protein 8A	LRRC8A	ALHLGNNVLQSLPSR	15	0	1617.9	yes	yes	3		9.9848e-05	137.62	8878800
Q8IWT6	Leucine-rich repeat-containing protein 8A	LRRC8A	ALSETVVEESDPKPAFSK	18	1	1932.97	yes	yes	3		0.00014364	130.47	8260700
Q8IWT6	Leucine-rich repeat-containing protein 8A	LRRC8A	EESSYSDIPDVK	12	0	1367.61	yes	yes	2		0.0037563	104.24	0
Q8IWT6	Leucine-rich repeat-containing protein 8A	LRRC8A	EIPLWIYSLK	10	0	1260.71	yes	yes	2		0.0035527	101.3	1021100
Q8IWT6	Leucine-rich repeat-containing protein 8A	LRRC8A	FAVFLSEVSENK	12	0	1368.69	no	no	2		4.4799e-06	169.89	1932600
Q8IWT6	Leucine-rich repeat-containing protein 8A	LRRC8A	IEAPALAFLR	10	0	1099.64	yes	yes	2		0.00013366	150.61	5988300
Q8IWT6	Leucine-rich repeat-containing protein 8A	LRRC8A	IEQGIVDR	8	0	928.498	yes	yes	2		0.0056428	112.36	3446000
Q8IWT6	Leucine-rich repeat-containing protein 8A	LRRC8A	LEHFVSILLK	10	0	1197.71	yes	yes	3		0.0022851	104.22	4725300
Q8IWT6	Leucine-rich repeat-containing protein 8A	LRRC8A	LELIPDVTIPPSIAQLTGLK	20	0	2117.23	yes	yes	2		0.033728	58.848	191210
Q8IWT6	Leucine-rich repeat-containing protein 8A	LRRC8A	LPQVVTDVGVHLQK	14	0	1531.87	yes	yes	3		0.0024514	101.38	4215900
Q8IWT6	Leucine-rich repeat-containing protein 8A	LRRC8A	MANLTELELIR	11	0	1301.7	yes	yes	2		9.2857e-14	234.3	2897500
Q8IWT6	Leucine-rich repeat-containing protein 8A	LRRC8A	SGLVVEEDLFNTLPPEVK	18	0	1985.04	yes	yes	2	3	3.8594e-12	197.1	3610900
Q8IWT6	Leucine-rich repeat-containing protein 8A	LRRC8A	SSTVSEDVEATVPMLQR	17	0	1847.89	yes	yes	2		0.00017223	115.38	1066000
Q8IWT6	Leucine-rich repeat-containing protein 8A	LRRC8A	THVEEGDIVYR	11	0	1316.64	yes	yes	2		0.0032194	105.13	2457000
Q8IWT6	Leucine-rich repeat-containing protein 8A	LRRC8A	TIEEIISFQHLHR	13	0	1621.86	yes	yes	3		0.002257	100.04	5015100
Q8IWT6	Leucine-rich repeat-containing protein 8A	LRRC8A	TLEELHLTGNLSAENNR	17	0	1909.95	yes	yes	3		7.1687e-07	156.96	3017500
Q8IWT6	Leucine-rich repeat-containing protein 8A	LRRC8A	VGELTNLTQIELR	13	0	1484.82	yes	yes	2		3.0914e-15	228.17	5511100
Q8IWT6	Leucine-rich repeat-containing protein 8A	LRRC8A	YFADTQPAYR	10	0	1230.57	yes	yes	2		4.2407e-05	153.1	1059500
Q8IWT6	Leucine-rich repeat-containing protein 8A	LRRC8A	YIVIDGLR	8	0	947.544	yes	yes	2		0.025964	85.161	8418700
Q8IXB1	DnaJ homolog subfamily C member 10	DNAJC10	ILYDILAFAK	10	0	1165.67	yes	yes	2		0.0049754	102.52	0
Q8IXB1	DnaJ homolog subfamily C member 10	DNAJC10	NSILFLNSLDAK	12	0	1333.72	yes	yes	2		0.0070567	95.195	539840
Q8IXB1	DnaJ homolog subfamily C member 10	DNAJC10	YDFGIYDDDPEIITLER	17	0	2072.96	yes	yes	2		0.0001073	119.04	0
Q8N1F7	Nuclear pore complex protein Nup93	NUP93	AQHQLGEFK	9	0	1056.54	yes	yes	3		0.013559	85.862	1726800
Q8N1F7	Nuclear pore complex protein Nup93	NUP93	DNALLSAIEESR	12	0	1316.66	yes	yes	2		5.973e-06	169.04	804400
Q8N1F7	Nuclear pore complex protein Nup93	NUP93	EALQYFYFLR	10	0	1348.68	yes	yes	2		1.3407e-05	167.09	464890
Q8N1F7	Nuclear pore complex protein Nup93	NUP93	FTSDTKPIINK	11	1	1262.69	yes	yes	3		0.023408	78.098	1427000
Q8N1F7	Nuclear pore complex protein Nup93	NUP93	GLDISHISQR	10	0	1124.59	yes	yes	2		0.013028	90.913	939690
Q8N1F7	Nuclear pore complex protein Nup93	NUP93	LLSPVVPQISAPQSNK	16	0	1676.95	yes	yes	2		0.043127	64.476	876290
Q8N1F7	Nuclear pore complex protein Nup93	NUP93	LVPLNQESVEER	12	0	1411.73	yes	yes	2		0.028656	69.345	1549400
Q8N1F7	Nuclear pore complex protein Nup93	NUP93	NLQEIQQAGER	11	0	1284.64	yes	yes	2		5.997e-05	150.49	1281700
Q8N1F7	Nuclear pore complex protein Nup93	NUP93	TLITFAGMIPYR	12	0	1381.74	yes	yes	2		0.0016274	116.74	505400
Q8N3E9	1-phosphatidylinositol 4,5-bisphosphate phosphodiesterase delta-3	PLCD3	MGLTEDEDVR	10	0	1163.51	yes	yes	2		4.5133e-07	185.33	14055000		+
Q8N3E9	1-phosphatidylinositol 4,5-bisphosphate phosphodiesterase delta-3	PLCD3	NLDLAAPTAEEAQR	14	0	1497.74	yes	yes	2		1.9257e-20	252.12	24309000	+
Q8N3E9	1-phosphatidylinositol 4,5-bisphosphate phosphodiesterase delta-3	PLCD3	RPELEEIFHQYSGEDR	16	1	2003.93	yes	yes	3	4	8.4222e-09	179.74	34491000	+
Q8N3E9	1-phosphatidylinositol 4,5-bisphosphate phosphodiesterase delta-3	PLCD3	TTLSIQVLTAQQLPK	15	0	1639.95	yes	yes	2	3	1.3691e-12	220.25	21043000	+
Q8N3E9	1-phosphatidylinositol 4,5-bisphosphate phosphodiesterase delta-3	PLCD3	AQQLIQTYELNETAK	15	0	1748.89	yes	yes	2		1.3998e-15	244	1547600	+
Q8N3E9	1-phosphatidylinositol 4,5-bisphosphate phosphodiesterase delta-3	PLCD3	ALSDREEEEEDDEEEEEEVEAAAQR	25	1	2935.2	yes	yes	3		0.0021646	81.48	1108400
Q8N3E9	1-phosphatidylinositol 4,5-bisphosphate phosphodiesterase delta-3	PLCD3	APSQHIFFVQHIEAVR	16	0	1877.99	yes	yes	3	4	0.00012427	124.5	36001000
Q8N3E9	1-phosphatidylinositol 4,5-bisphosphate phosphodiesterase delta-3	PLCD3	DGASLSPATLFIQIR	15	0	1587.86	yes	yes	2		5.8539e-08	175.15	4092600
Q8N3E9	1-phosphatidylinositol 4,5-bisphosphate phosphodiesterase delta-3	PLCD3	DVVQAVR	7	0	785.44	yes	yes	2		0.0099562	111.01	7424700
Q8N3E9	1-phosphatidylinositol 4,5-bisphosphate phosphodiesterase delta-3	PLCD3	FVVEDYDATSPNDFVGQFTLPLSSLK	26	0	2888.41	yes	yes	2		0.016677	57.738	175060
Q8N3E9	1-phosphatidylinositol 4,5-bisphosphate phosphodiesterase delta-3	PLCD3	HIHLLSK	7	0	846.508	yes	no	2		0.032625	85.265	1280200
Q8N3E9	1-phosphatidylinositol 4,5-bisphosphate phosphodiesterase delta-3	PLCD3	LDHWIHSYLHR	11	0	1475.74	yes	yes	4		0.031205	49.466	4267400
Q8N3E9	1-phosphatidylinositol 4,5-bisphosphate phosphodiesterase delta-3	PLCD3	LEGAEIEEFLR	11	0	1304.66	yes	yes	2		1.9761e-10	218.55	9066600
Q8N3E9	1-phosphatidylinositol 4,5-bisphosphate phosphodiesterase delta-3	PLCD3	LNAEKPHSIVDPLVR	15	1	1686.94	yes	yes	3		0.00069079	127.3	37543000
Q8N3E9	1-phosphatidylinositol 4,5-bisphosphate phosphodiesterase delta-3	PLCD3	LQEDGLSVWFQR	12	0	1476.74	yes	yes	2		1.7565e-05	148.89	2388100
Q8N3E9	1-phosphatidylinositol 4,5-bisphosphate phosphodiesterase delta-3	PLCD3	RPPEEPPVAAQVAAQVAAPVALPSPPTPSDGGTK	34	1	3301.73	yes	yes	3	4	1.4092e-06	115.72	4047900
Q8N3E9	1-phosphatidylinositol 4,5-bisphosphate phosphodiesterase delta-3	PLCD3	VLSAPELLEFLEDQGEEGATLAR	23	0	2486.25	yes	yes	2	3	1.1516e-07	140.12	2455500
Q8N6R0	Methyltransferase-like protein 13	METTL13	AMIAGLALLR	10	0	1027.62	yes	yes	2		0.00019661	131.06	0
Q8N6R0	Methyltransferase-like protein 13	METTL13	AVFPLLYVR	9	0	1076.64	yes	yes	2		0.026405	78.77	597720
Q8N6R0	Methyltransferase-like protein 13	METTL13	VHIADGLDYIASLAGGGEAR	20	0	1984	yes	yes	3		0.00073174	100.69	1291300
Q8NE71	ATP-binding cassette sub-family F member 1	ABCF1	GAVIVVSHDAR	11	0	1122.61	yes	yes	2		0.00032131	141.08	1656500
Q8NE71	ATP-binding cassette sub-family F member 1	ABCF1	GFNLPYQDAR	10	0	1179.57	yes	yes	2		0.007483	97.452	1017100
Q8NE71	ATP-binding cassette sub-family F member 1	ABCF1	IGFFNQQYAEQLR	13	0	1612.8	yes	yes	2		4.3511e-08	183.06	1153500
Q8NE71	ATP-binding cassette sub-family F member 1	ABCF1	LQGQLEQGDDTAAER	15	0	1629.76	yes	yes	2		9.8531e-12	213.69	2648100
Q8NE71	ATP-binding cassette sub-family F member 1	ABCF1	NQDEESQEAPELLK	14	0	1628.75	yes	yes	2		2.8298e-12	219.95	1285500
Q8NE71	ATP-binding cassette sub-family F member 1	ABCF1	STLLLLLTGK	10	0	1057.67	yes	yes	2		0.00010959	153.1	2538300
Q8NI36	WD repeat-containing protein 36	WDR36	NLLNLDVIK	9	0	1040.62	yes	yes	2		0.0078841	102.06	738610
Q8NI36	WD repeat-containing protein 36	WDR36	SAPFFIPTIPGLVPR	15	0	1610.92	yes	yes	2		0.0038318	96.464	891000
Q8NI36	WD repeat-containing protein 36	WDR36	VVNLGVLAQK	10	0	1039.64	yes	yes	2		0.002864	112.3	1126800
Q8WTT2	Nucleolar complex protein 3 homolog	NOC3L	FYLENLEQMVK	11	0	1412.7	yes	yes	2		1.1489e-10	220.5	7612000	+
Q8WTT2	Nucleolar complex protein 3 homolog	NOC3L	EFEEGLVSQYK	11	0	1327.63	yes	yes	2		2.3078e-07	181.68	4270000
Q8WTT2	Nucleolar complex protein 3 homolog	NOC3L	ELIHLLPIK	9	0	1074.68	yes	yes	2		0.032056	41.427	898210
Q8WTT2	Nucleolar complex protein 3 homolog	NOC3L	ELIHLLPIKDK	11	1	1317.8	yes	yes	3		0.013767	87.789	1874900
Q8WTT2	Nucleolar complex protein 3 homolog	NOC3L	FAAHLIAGAPSEGSGALKPELSR	23	1	2278.21	yes	yes	3	4	0.00049033	107.92	27407000
Q8WTT2	Nucleolar complex protein 3 homolog	NOC3L	FLQGDSFLNEDLNQLIK	17	0	1993.02	yes	yes	2	3	1.9408e-27	268.17	6300800
Q8WTT2	Nucleolar complex protein 3 homolog	NOC3L	FYTHLYK	7	0	970.491	yes	yes	2		0.0077945	111.65	1925900
Q8WTT2	Nucleolar complex protein 3 homolog	NOC3L	HYHPIVQR	8	0	1048.56	yes	yes	3		0.010956	94.262	10577000
Q8WTT2	Nucleolar complex protein 3 homolog	NOC3L	IRPLTEAEK	9	1	1055.6	yes	yes	3		0.0011075	135.71	7345600
Q8WTT2	Nucleolar complex protein 3 homolog	NOC3L	LGQASLGVIK	10	0	984.597	yes	yes	2		1.8309e-05	172.21	12942000
Q8WTT2	Nucleolar complex protein 3 homolog	NOC3L	LREFEEGLVSQYK	13	1	1596.81	yes	yes	3		0.03123	63.662	3539100
Q8WTT2	Nucleolar complex protein 3 homolog	NOC3L	NYEVRPEMLK	10	1	1277.64	yes	yes	2		1.8277e-05	193.83	2091400
Q8WTT2	Nucleolar complex protein 3 homolog	NOC3L	SMLMEQDPDVAVTVR	15	0	1689.81	yes	yes	2		1.1443e-15	228.11	2311300
Q8WTT2	Nucleolar complex protein 3 homolog	NOC3L	VISGFVK	7	0	748.448	yes	yes	2		0.02666	94.006	8986600
Q8WTT2	Nucleolar complex protein 3 homolog	NOC3L	YSSEVATESPLDFTK	15	0	1672.78	yes	yes	2		9.491e-16	231.58	4695000
Q8WUA4	General transcription factor 3C polypeptide 2	GTF3C2	ADLIPYQDSPEGPDHSSASSGVPNPPK	27	0	2761.28	yes	yes	3		0.02249	56.588	2360800
Q8WUA4	General transcription factor 3C polypeptide 2	GTF3C2	AELLLLK	7	0	798.521	yes	yes	2		0.0090647	111.65	3328000
Q8WUA4	General transcription factor 3C polypeptide 2	GTF3C2	ANSHFLVSAGSDR	13	0	1359.65	yes	yes	3		0.023029	64.534	0
Q8WUA4	General transcription factor 3C polypeptide 2	GTF3C2	DLDRPESQSPK	11	1	1270.62	yes	yes	2		0.03648	101.35	577940
Q8WUA4	General transcription factor 3C polypeptide 2	GTF3C2	EGLPEDGTLYR	11	0	1248.6	yes	yes	2		0.0069272	94.465	0
Q8WUA4	General transcription factor 3C polypeptide 2	GTF3C2	FSSITAHPER	10	0	1143.57	yes	yes	2		0.001066	124.67	1781800
Q8WUA4	General transcription factor 3C polypeptide 2	GTF3C2	GLASPLGHR	9	0	906.504	yes	yes	2		0.010986	101.25	1210200
Q8WUA4	General transcription factor 3C polypeptide 2	GTF3C2	LQLEAIHK	8	0	950.555	yes	yes	2		0.03267	80.455	2193100
Q8WUA4	General transcription factor 3C polypeptide 2	GTF3C2	RPGFSPTSHR	10	1	1140.58	yes	yes	3		0.00045605	131.42	7236500
Q8WUA4	General transcription factor 3C polypeptide 2	GTF3C2	RPQQPNPPSAPLVPGLLDQSNPLSTPMPK	29	1	3075.62	yes	yes	3		3.6907e-05	101.04	1341100
Q8WUA4	General transcription factor 3C polypeptide 2	GTF3C2	RPYEPINSIK	10	1	1215.66	yes	yes	2		0.0016613	123.01	3235700
Q8WUA4	General transcription factor 3C polypeptide 2	GTF3C2	SPLFSVQR	8	0	932.508	yes	yes	2		0.0054961	113.18	2127100
Q8WUA4	General transcription factor 3C polypeptide 2	GTF3C2	WHLLSELEAAPYLPQEEK	18	0	2152.08	yes	yes	3		0.015834	64.588	1306000
Q8WXW3	Progesterone-induced-blocking factor 1	PIBF1	ANSLLNQTQQPYR	13	0	1531.77	yes	yes	2		0.00013224	141.73	922460
Q8WXW3	Progesterone-induced-blocking factor 1	PIBF1	DALEQEVIELR	11	0	1313.68	yes	yes	2		0.00031277	136.93	1410200
Q8WXW3	Progesterone-induced-blocking factor 1	PIBF1	DFELTEEQYIK	11	0	1413.67	yes	yes	2		0.0011226	118.77	952320
Q8WXW3	Progesterone-induced-blocking factor 1	PIBF1	ELLHNIQLLK	10	0	1219.73	yes	yes	2		0.017121	82.831	693540
Q8WXW3	Progesterone-induced-blocking factor 1	PIBF1	ELQLSTESK	9	0	1033.53	yes	yes	2		0.024462	80.706	494570
Q8WXW3	Progesterone-induced-blocking factor 1	PIBF1	EVVTLEQTVTLLQK	14	0	1599.91	yes	yes	2		0.0037927	98.676	722040
Q8WXW3	Progesterone-induced-blocking factor 1	PIBF1	IDSLTESIAQLEK	13	0	1445.76	yes	yes	2		7.5562e-06	164.88	2668600
Q8WXW3	Progesterone-induced-blocking factor 1	PIBF1	ITELQAQNSEHQAR	14	0	1623.8	yes	yes	3		0.010995	78.529	2265300
Q8WXW3	Progesterone-induced-blocking factor 1	PIBF1	LALELADTK	9	0	972.549	yes	yes	2		0.034974	65.278	1142000
Q8WXW3	Progesterone-induced-blocking factor 1	PIBF1	LDNQLAFQQK	10	0	1203.62	yes	yes	2		0.00019746	144.17	1022700
Q8WXW3	Progesterone-induced-blocking factor 1	PIBF1	NILAEELSTNK	11	0	1230.65	yes	yes	2		3.683e-05	152.96	1121300
Q8WXW3	Progesterone-induced-blocking factor 1	PIBF1	TNQEIDQLR	9	0	1115.56	yes	yes	2		0.0040033	109.16	969930
Q92541	RNA polymerase-associated protein RTF1 homolog	RTF1	FNDQDIEEIVK	11	0	1348.65	yes	yes	2		0.0010068	121.21	1060400
Q92541	RNA polymerase-associated protein RTF1 homolog	RTF1	NISAISYINQR	11	0	1277.67	yes	yes	2		0.00068531	125.36	708780
Q92541	RNA polymerase-associated protein RTF1 homolog	RTF1	SQPVSLPEELNR	12	0	1367.7	yes	yes	2		0.033873	77.894	0
Q92541	RNA polymerase-associated protein RTF1 homolog	RTF1	VAEITGVVETAK	12	0	1215.67	yes	yes	2		0.0036214	106.54	1302400
Q92674	Centromere protein I	CENPI	EFTNFLDTIIR	11	0	1367.71	yes	yes	2		4.2164e-06	172.13	478880
Q92674	Centromere protein I	CENPI	FFAPALISVSLPVR	14	0	1515.88	yes	yes	2		0.00047411	129.37	384600
Q92674	Centromere protein I	CENPI	GIYIDPEILEK	11	0	1288.69	yes	yes	2		0.042005	67.385	571230
Q92830	Histone acetyltransferase KAT2A	KAT2A	IPYTELSHIIK	11	0	1312.74	yes	yes	2		0.0055409	97.452	1463500
Q92830	Histone acetyltransferase KAT2A	KAT2A	KLFVADLQR	9	1	1088.63	yes	yes	3		0.0059802	96.665	0
Q92830	Histone acetyltransferase KAT2A	KAT2A	LETPAQFR	8	0	960.503	yes	yes	2		0.021817	89.752	1588300
Q92830	Histone acetyltransferase KAT2A	KAT2A	SEAPDYYEVIR	11	0	1340.62	yes	yes	2		0.00060979	124.42	3143400
Q92830	Histone acetyltransferase KAT2A	KAT2A	SQAEDVATYK	10	0	1110.52	yes	yes	2		0.00011033	151.79	3249400
Q92830	Histone acetyltransferase KAT2A	KAT2A	TLILTHFPK	9	0	1068.63	yes	no	2	3	0.0084662	95.358	3771000
Q92830	Histone acetyltransferase KAT2A	KAT2A	YETTHVFGR	9	0	1108.53	yes	yes	3		0.012767	86.136	6192900
Q92974	Rho guanine nucleotide exchange factor 2	ARHGEF2	DLLVGPGVELLLTPR	15	0	1590.93	yes	yes	2		0.00012176	139.58	333920
Q92974	Rho guanine nucleotide exchange factor 2	ARHGEF2	ELLSNVDEGIYQLEK	15	0	1748.88	yes	yes	2		2.7255e-17	244.18	2059200
Q92974	Rho guanine nucleotide exchange factor 2	ARHGEF2	ILQHSHGIEEER	12	0	1446.72	yes	yes	3	4	0.0027171	98.156	2402400
Q92974	Rho guanine nucleotide exchange factor 2	ARHGEF2	LQEIYNR	7	0	934.487	yes	yes	2		0.039953	79.713	926150
Q96KP1	Exocyst complex component 2	EXOC2	ASNTADTLFQEVLGR	15	0	1620.81	yes	yes	2		6.9116e-21	257.48	5774400	+
Q96KP1	Exocyst complex component 2	EXOC2	DTVAVYLTPESK	12	0	1321.68	yes	yes	2		0.0029517	108.72	0
Q96KP1	Exocyst complex component 2	EXOC2	FLFNLPLNIER	11	0	1374.77	yes	yes	2		8.0458e-05	147.28	4056800
Q96KP1	Exocyst complex component 2	EXOC2	GALLPLSIR	9	0	938.591	yes	yes	2		0.014933	95.358	2282800
Q96KP1	Exocyst complex component 2	EXOC2	GDYDVVINDYEK	12	0	1428.64	yes	yes	2		0.00018605	141.37	2271800
Q96KP1	Exocyst complex component 2	EXOC2	HNFQGIEK	8	0	971.482	yes	yes	2		0.00325	126.24	3523300
Q96KP1	Exocyst complex component 2	EXOC2	HTFLNIAEHFEK	12	0	1484.74	yes	yes	3		1.2143e-05	148.13	6723400
Q96KP1	Exocyst complex component 2	EXOC2	ITQVSMASLK	10	0	1076.59	yes	yes	2		0.0024582	114.76	1861600
Q96KP1	Exocyst complex component 2	EXOC2	LENVLNR	7	0	856.477	yes	yes	2		0.0091931	110.12	3725900
Q96KP1	Exocyst complex component 2	EXOC2	LFENYIELK	9	0	1167.62	yes	yes	2		1.4908e-06	196.27	2656800
Q96KP1	Exocyst complex component 2	EXOC2	LLEELLNK	8	0	970.57	yes	yes	2		0.00025217	166.68	4180100
Q96KP1	Exocyst complex component 2	EXOC2	LLETPSTLHDQK	12	0	1380.72	yes	yes	3		0.020116	69.721	2227100
Q96KP1	Exocyst complex component 2	EXOC2	LVLSQLPNFWK	11	0	1343.76	yes	yes	2		3.7007e-05	141.89	0
Q96KP1	Exocyst complex component 2	EXOC2	MIQEVMHSLVK	11	0	1313.68	yes	yes	3		0.00028864	131.12	2236200
Q96KP1	Exocyst complex component 2	EXOC2	NALNVLQR	8	0	926.53	yes	yes	2		0.0040754	122.18	3683100
Q96KP1	Exocyst complex component 2	EXOC2	PANPLGIEIEK	11	0	1179.65	yes	yes	2		0.0033554	107.39	1339700
Q96KP1	Exocyst complex component 2	EXOC2	SEGSLAYVK	9	0	952.487	yes	yes	2		0.0044792	109.44	1369800
Q96KP1	Exocyst complex component 2	EXOC2	TEVQVFK	7	0	849.46	yes	yes	2		0.025549	96.19	0
Q96KP1	Exocyst complex component 2	EXOC2	VIEAVSEELSR	11	0	1230.65	yes	yes	2		1.3417e-05	166.11	6594600
Q96P47	Arf-GAP with GTPase, ANK repeat and PH domain-containing protein 3	AGAP3	ATPATAPGTSPR	12	0	1125.58	yes	yes	2		0.0093796	96.82	1165000
Q96P47	Arf-GAP with GTPase, ANK repeat and PH domain-containing protein 3	AGAP3	LFLAPLPSSDVPLGQQLLR	19	0	2063.18	yes	yes	2		8.9762e-05	115.2	749080
Q99459	Cell division cycle 5-like protein	CDC5L	TPSNGAEGLTPR	12	0	1198.59	yes	yes	2		0.004688	128.21	784210	+
Q99459	Cell division cycle 5-like protein	CDC5L	ESDLPSAILQTSGVSEFTK	19	0	2008	yes	yes	2		2.7016e-28	281.53	2741700
Q99459	Cell division cycle 5-like protein	CDC5L	GGLNTPLHESDFSGVTPQR	19	0	2010.98	yes	yes	3		5.6341e-05	117.78	4528800
Q99459	Cell division cycle 5-like protein	CDC5L	GVDYNAEIPFEK	12	0	1380.66	yes	yes	2		0.000998	121.24	3224300
Q99459	Cell division cycle 5-like protein	CDC5L	ILLGGYQSR	9	0	1005.56	yes	yes	2		0.028721	79.489	1589400
Q99459	Cell division cycle 5-like protein	CDC5L	ILQEAQNLMALTNVDTPLK	19	0	2111.13	yes	yes	2	3	7.2703e-22	243.16	3409600
Q99459	Cell division cycle 5-like protein	CDC5L	KPALGFYDTSEENYQALDADFR	22	1	2549.17	yes	yes	3		3.7025e-05	106.39	1135300
Q99459	Cell division cycle 5-like protein	CDC5L	LGLLGLPAPK	10	0	977.627	yes	yes	2		0.0010984	128.38	6984100
Q99459	Cell division cycle 5-like protein	CDC5L	LVLPAPQISDAELQEVVK	18	0	1948.09	yes	yes	2	3	3.1616e-06	136.43	4089300
Q99459	Cell division cycle 5-like protein	CDC5L	NDFEIVLPENAEKELEER	18	1	2173.05	yes	yes	3		0.024703	64.89	830010
Q99459	Cell division cycle 5-like protein	CDC5L	VGQASEIAR	9	0	929.493	yes	yes	2		0.00016761	162.64	1666800
Q99985	Semaphorin-3C	SEMA3C	EGPNHQLISYQGR	13	0	1497.73	yes	yes	3		0.014569	73.082	1243200
Q99985	Semaphorin-3C	SEMA3C	IIATSQGLLIR	11	0	1183.73	yes	yes	2		3.6866e-07	171.67	0
Q99985	Semaphorin-3C	SEMA3C	NAAEIVQYGVK	11	0	1190.63	yes	yes	2		0.00021814	144.7	2449300
Q99985	Semaphorin-3C	SEMA3C	TSEYFSLSHHPLDYR	15	0	1850.86	yes	yes	3		0.0023315	88.092	0
Q99985	Semaphorin-3C	SEMA3C	TTLVYGIFTTSSSVFK	16	0	1749.92	yes	yes	2		5.2495e-06	153.41	258400
Q99985	Semaphorin-3C	SEMA3C	VLDSEMVAVVTDK	13	0	1404.72	yes	yes	2		0.00051364	129.17	1607900
Q99985	Semaphorin-3C	SEMA3C	VYLTFDELR	9	0	1154.6	yes	yes	2		0.0017105	125.71	1157400
Q99985	Semaphorin-3C	SEMA3C	YHVLFLGTDR	10	0	1219.63	yes	yes	2		0.010483	92.239	687210
Q9BQ39	ATP-dependent RNA helicase DDX50	DDX50	GAVDALAAALAHISGASSFEPR	22	0	2110.08	yes	yes	2	3	3.447e-05	110.64	1974200
Q9BQ39	ATP-dependent RNA helicase DDX50	DDX50	GVTYLFPIQVK	11	0	1263.72	yes	yes	2		1.1885e-05	166.86	3368000
Q9BQ39	ATP-dependent RNA helicase DDX50	DDX50	LSSNAVSQITR	11	0	1174.63	yes	yes	2		0.0018122	119.25	2139600
Q9BQ39	ATP-dependent RNA helicase DDX50	DDX50	RVSSLDTSTHK	11	1	1229.64	yes	yes	3		0.040286	49.448	43768
Q9BQ39	ATP-dependent RNA helicase DDX50	DDX50	SLASVSYAAVDFFR	14	0	1531.77	yes	yes	2	3	2.2285e-05	146.96	1190400
Q9BQ39	ATP-dependent RNA helicase DDX50	DDX50	SLASVSYAAVDFFRPSAQR	19	1	2071.05	yes	yes	3		0.0098969	82.578	560890
Q9BQ39	ATP-dependent RNA helicase DDX50	DDX50	SRYEQVDLVGK	11	1	1292.67	yes	yes	2		0.0030245	140.45	1702500
Q9BQ39	ATP-dependent RNA helicase DDX50	DDX50	SSDNKLEETLTR	12	1	1391.69	yes	yes	2		0.0080706	120.6	903300
Q9BQ39	ATP-dependent RNA helicase DDX50	DDX50	TFSFAIPLIER	11	0	1292.71	yes	yes	2		7.57e-05	149.49	4568200
Q9BQ39	ATP-dependent RNA helicase DDX50	DDX50	VGVPSTMDLVK	11	0	1144.62	yes	yes	2		0.037881	72.289	2052000
Q9BQ39	ATP-dependent RNA helicase DDX50	DDX50	VLVATNVAAR	10	0	1012.6	yes	yes	2		0.0020911	119.34	5119800
Q9BQ39	ATP-dependent RNA helicase DDX50	DDX50	YEQVDLVGK	9	0	1049.54	yes	yes	2		0.012124	96.342	1271500
Q9BUJ2	Heterogeneous nuclear ribonucleoprotein U-like protein 1	HNRNPUL1	HLPSTEPDPHVVR	13	0	1482.76	yes	yes	3		0.029293	61.11	2450400
Q9BUJ2	Heterogeneous nuclear ribonucleoprotein U-like protein 1	HNRNPUL1	INEEISVK	8	0	930.502	yes	yes	2		0.017112	96.034	14486000
Q9BUJ2	Heterogeneous nuclear ribonucleoprotein U-like protein 1	HNRNPUL1	NPPGASTYNK	10	0	1047.5	yes	yes	2		0.024789	79.148	227380
Q9BUJ2	Heterogeneous nuclear ribonucleoprotein U-like protein 1	HNRNPUL1	NYILDQTNVYGSAQR	15	0	1740.84	yes	yes	2		6.1828e-27	279.19	1108700
Q9BXJ9	N-alpha-acetyltransferase 15, NatA auxiliary subunit	NAA15	AIELATTLDESLTNR	15	0	1645.85	yes	yes	2		9.9039e-16	231.58	2800900
Q9BXJ9	N-alpha-acetyltransferase 15, NatA auxiliary subunit	NAA15	DLSLLQIQMR	10	0	1215.66	yes	no	2		9.811e-10	206.49	1674300
Q9BXJ9	N-alpha-acetyltransferase 15, NatA auxiliary subunit	NAA15	FAEHGETLAMK	11	0	1232.59	yes	no	3		0.0012992	117.02	2100000
Q9BXJ9	N-alpha-acetyltransferase 15, NatA auxiliary subunit	NAA15	FLLMLQSVK	9	0	1077.63	yes	no	2		0.00094771	138.08	1445300
Q9BXJ9	N-alpha-acetyltransferase 15, NatA auxiliary subunit	NAA15	ILEEFRK	7	1	933.528	yes	yes	2		0.049024	76.774	1432500
Q9BXJ9	N-alpha-acetyltransferase 15, NatA auxiliary subunit	NAA15	KEEAYELVR	9	1	1135.59	yes	yes	3		0.03004	57.347	841670
Q9BXJ9	N-alpha-acetyltransferase 15, NatA auxiliary subunit	NAA15	LEDAADVYR	9	0	1050.5	yes	yes	2		0.0082259	101.38	4842600
Q9BXJ9	N-alpha-acetyltransferase 15, NatA auxiliary subunit	NAA15	LPLNFLSGEK	10	0	1116.62	yes	yes	2		0.037033	72.848	770750
Q9BXJ9	N-alpha-acetyltransferase 15, NatA auxiliary subunit	NAA15	MVYYLDPSSQK	11	0	1329.63	yes	yes	2		0.0042336	101.39	0
Q9BXJ9	N-alpha-acetyltransferase 15, NatA auxiliary subunit	NAA15	NFNETFLK	8	0	1011.5	yes	yes	2		0.0037465	122.19	3175300
Q9BXJ9	N-alpha-acetyltransferase 15, NatA auxiliary subunit	NAA15	RLPLNFLSGEK	11	1	1272.72	yes	yes	2		0.00016284	152.96	2610600
Q9BXJ9	N-alpha-acetyltransferase 15, NatA auxiliary subunit	NAA15	VETPLEEAIK	10	0	1127.61	yes	yes	2		0.0067144	99.788	2837300
Q9BXJ9	N-alpha-acetyltransferase 15, NatA auxiliary subunit	NAA15	WDKDNLQILR	10	1	1299.69	yes	yes	3		0.0080167	94.692	3059400
Q9BXJ9	N-alpha-acetyltransferase 15, NatA auxiliary subunit	NAA15	YQLLQLR	7	0	932.544	yes	no	2		0.030081	90.777	0
Q9H3U1	Protein unc-45 homolog A	UNC45A	ASFITANGVSLLK	13	0	1319.74	yes	yes	2		2.4805e-08	195.71	4968500	+
Q9H3U1	Protein unc-45 homolog A	UNC45A	SNGVQLLQR	9	0	1013.56	yes	yes	2		0.008998	120.45	738640	+
Q9H3U1	Protein unc-45 homolog A	UNC45A	ALFQLSR	7	0	833.476	yes	yes	2		0.0053269	125.81	5326400
Q9H3U1	Protein unc-45 homolog A	UNC45A	ALIPLALEGTDVGQTK	16	0	1624.9	yes	yes	2		4.6947e-21	254.94	4270800
Q9H3U1	Protein unc-45 homolog A	UNC45A	ASQNLVVLAR	10	0	1069.62	yes	yes	2		0.0026107	113.67	8760100
Q9H3U1	Protein unc-45 homolog A	UNC45A	DNALTLLIK	9	0	999.596	yes	yes	2		6.0691e-05	176.6	7929700
Q9H3U1	Protein unc-45 homolog A	UNC45A	DPNNSLTLWVIDQGLK	16	0	1811.94	yes	yes	2		0.00013498	129.88	172310
Q9H3U1	Protein unc-45 homolog A	UNC45A	EGAIIVDPAR	10	0	1039.57	yes	yes	2		0.00021764	128.51	0
Q9H3U1	Protein unc-45 homolog A	UNC45A	EVQDLFEAQGNDR	13	0	1519.69	yes	yes	2		3.3796e-15	225.21	2067700
Q9H3U1	Protein unc-45 homolog A	UNC45A	GAVVVLNMVEASR	13	0	1343.72	yes	yes	2		4.2641e-12	225.97	4040800
Q9H3U1	Protein unc-45 homolog A	UNC45A	LEDYDKAETEASK	13	1	1497.68	yes	yes	2	3	0.00065738	156.2	6374400
Q9H3U1	Protein unc-45 homolog A	UNC45A	LGSAGGTDFSMK	12	0	1169.54	yes	yes	2		0.0036895	107.17	2085400
Q9H3U1	Protein unc-45 homolog A	UNC45A	LLDMGETDLMLAALR	15	0	1660.85	yes	yes	2		2.1994e-06	165.78	1684000
Q9H3U1	Protein unc-45 homolog A	UNC45A	LLVLYSGEDDELLQR	15	0	1761.91	yes	yes	2		8.3198e-21	250.81	4203500
Q9H3U1	Protein unc-45 homolog A	UNC45A	LTITSNPEMTFPGER	15	0	1691.82	yes	yes	2		5.9159e-08	172.43	3024100
Q9H3U1	Protein unc-45 homolog A	UNC45A	MSASILLSK	9	0	948.531	yes	yes	2		0.022867	84.817	2597700
Q9H3U1	Protein unc-45 homolog A	UNC45A	NIGGQIQEK	9	0	985.519	yes	yes	2		0.01742	96.665	1920100
Q9H3U1	Protein unc-45 homolog A	UNC45A	SWFEGQGLAGK	11	0	1178.57	yes	yes	2		0.0011257	124.39	1207700
Q9H3U1	Protein unc-45 homolog A	UNC45A	TVATLSILGTR	11	0	1130.67	yes	yes	2		4.5942e-11	231.05	5720000
Q9H3U1	Protein unc-45 homolog A	UNC45A	TVSGPGTPEPR	11	0	1096.55	yes	yes	2		0.0046461	105.13	0
Q9H3U1	Protein unc-45 homolog A	UNC45A	VEQMFQILLDPEEK	14	0	1717.86	yes	yes	2		1.1221e-05	155.06	1545100
Q9H3U1	Protein unc-45 homolog A	UNC45A	VFLALVEEVEDR	12	0	1417.75	yes	yes	2		1.3892e-05	155.47	1227700
Q9H3U1	Protein unc-45 homolog A	UNC45A	VFQEALR	7	0	861.471	yes	yes	2		0.0059998	122.18	5102700
Q9H4G0	Band 4.1-like protein 1	EPB41L1	DVLTSTYGATAETLSTSTTTHVTK	24	0	2484.22	yes	yes	3		0.0013671	75.868	5080900
Q9H4G0	Band 4.1-like protein 1	EPB41L1	DYSEADGLSER	11	0	1240.52	yes	yes	2		5.1595e-06	174.23	2327000
Q9H4G0	Band 4.1-like protein 1	EPB41L1	GAAAMIPGPQTVATEIR	17	0	1681.88	yes	yes	2		0.049067	61.821	1927300
Q9H4G0	Band 4.1-like protein 1	EPB41L1	GMTPGEAEIHFLENAK	16	0	1742.83	yes	yes	2		6.9315e-06	149.22	1238400
Q9H4G0	Band 4.1-like protein 1	EPB41L1	HQASINELKR	10	1	1194.65	yes	yes	3		9.4106e-05	147.28	13625000
Q9H4G0	Band 4.1-like protein 1	EPB41L1	IEPEAVLQTR	10	0	1154.63	yes	yes	2		0.019546	89.266	0
Q9H4G0	Band 4.1-like protein 1	EPB41L1	IRPGEYEQFESTIGFK	16	1	1899.94	yes	yes	3		8.7674e-05	138.19	4218100
Q9H4G0	Band 4.1-like protein 1	EPB41L1	KKIEPEAVLQTR	12	2	1410.82	yes	yes	3		0.0048546	122.18	2923800
Q9H4G0	Band 4.1-like protein 1	EPB41L1	KLSMYGVDLHHAK	13	1	1497.78	no	no	3		0.026193	58.268	815230
Q9H4G0	Band 4.1-like protein 1	EPB41L1	LQHPDMLVTK	10	0	1180.63	yes	yes	2	3	0.01926	80.737	4701200
Q9H4G0	Band 4.1-like protein 1	EPB41L1	PASVSENHDAGPDGDKR	17	1	1750.79	yes	yes	3		0.030955	55.755	61197
Q9H4G0	Band 4.1-like protein 1	EPB41L1	RLPSSPASPSPK	12	1	1222.67	yes	yes	2	3	0.0027243	115.24	4393400
Q9H4G0	Band 4.1-like protein 1	EPB41L1	SSPWNFAFTVK	11	0	1282.63	yes	yes	2		0.014269	85.522	674000
Q9H4G0	Band 4.1-like protein 1	EPB41L1	TETMTVSSLAIR	12	0	1307.68	yes	yes	2		5.1567e-06	170.4	2079800
Q9NR30	Nucleolar RNA helicase 2	DDX21	AEPSEVDMNSPK	12	0	1302.58	yes	yes	2		0.00036956	136.3	8127700		+
Q9NR30	Nucleolar RNA helicase 2	DDX21	KAEPSEVDMNSPK	13	1	1430.67	yes	yes	2	3	2.1479e-08	193.45	14181000		+
Q9NR30	Nucleolar RNA helicase 2	DDX21	KKAEPSEVDMNSPK	14	2	1558.77	yes	yes	2	3	8.0522e-06	184.96	16181000		+
Q9NR30	Nucleolar RNA helicase 2	DDX21	SDAGLESDTAMK	12	0	1223.53	yes	yes	2		1.6502e-11	232.17	77727000		+
Q9NR30	Nucleolar RNA helicase 2	DDX21	EGAFSNFPISEETIK	15	0	1667.8	no	no	2	3	2.2179e-15	241.3	16160000	+
Q9NR30	Nucleolar RNA helicase 2	DDX21	MRNGIDILVGTPGR	14	1	1497.81	yes	yes	3		0.022043	81.327	1743800	+
Q9NR30	Nucleolar RNA helicase 2	DDX21	NGSFGVLVATNVAAR	15	0	1474.79	yes	yes	2		2.4231e-21	271.43	22617000	+
Q9NR30	Nucleolar RNA helicase 2	DDX21	APQVLVLAPTR	11	0	1163.7	yes	yes	2	3	0.00039649	136.27	417200000	+
Q9NR30	Nucleolar RNA helicase 2	DDX21	EEYQLVQVEQK	11	0	1391.69	yes	yes	2	3	5.6939e-31	326.85	123480000	+
Q9NR30	Nucleolar RNA helicase 2	DDX21	ELKEQLGEEIDSK	13	1	1516.76	yes	yes	2	3	1.6793e-16	271.64	86948000	+
Q9NR30	Nucleolar RNA helicase 2	DDX21	EQLGEEIDSK	10	0	1146.54	yes	yes	2		1.1098e-07	202.03	149860000	+
Q9NR30	Nucleolar RNA helicase 2	DDX21	GAVEALAAALAHISGATSVDQR	22	0	2107.1	yes	yes	2	3	1.6145e-10	176.85	135560000	+
Q9NR30	Nucleolar RNA helicase 2	DDX21	GLDIPEVDLVIQSSPPK	17	0	1805.98	yes	yes	2	3	0.0001516	140.28	24924000	+
Q9NR30	Nucleolar RNA helicase 2	DDX21	GVTFLFPIQAK	11	0	1219.7	yes	yes	2		2.6046e-07	181.53	192560000	+
Q9NR30	Nucleolar RNA helicase 2	DDX21	STYEQVDLIGK	11	0	1251.63	yes	yes	2		4.8958e-06	174.23	158130000	+
Q9NR30	Nucleolar RNA helicase 2	DDX21	STYEQVDLIGKK	12	1	1379.73	yes	yes	2	3	3.1269e-12	236.08	81247000	+
Q9NR30	Nucleolar RNA helicase 2	DDX21	WQLSVATEQPELEGPR	16	0	1838.92	yes	yes	2	3	1.4781e-15	230.97	16769000	+
Q9NR30	Nucleolar RNA helicase 2	DDX21	QDAQSLHGDIPQK	13	0	1435.71	yes	yes	2	3	2.9379e-11	209.11	89457000	+
Q9NR30	Nucleolar RNA helicase 2	DDX21	NGIDILVGTPGR	12	0	1210.67	no	no	2		4.7002e-15	231.74	169600000	+
Q9NR30	Nucleolar RNA helicase 2	DDX21	EAQELSQNSAIK	12	0	1316.66	yes	yes	2		2.1258e-11	216.83	133890000	+
Q9NR30	Nucleolar RNA helicase 2	DDX21	KEAQELSQNSAIK	13	1	1444.75	yes	yes	2	3	4.5623e-12	233.28	33741000	+
Q9NR30	Nucleolar RNA helicase 2	DDX21	IKDHIQNGK	9	1	1051.58	yes	yes	3		0.036334	66.962	951140	+
Q9NR30	Nucleolar RNA helicase 2	DDX21	IKDHIQNGKLDLTK	14	2	1621.92	yes	yes	3		9.3979e-06	206.66	8780900	+
Q9NR30	Nucleolar RNA helicase 2	DDX21	AAVIGDVIR	9	0	912.539	yes	yes	2		0.00089423	143.37	204980000
Q9NR30	Nucleolar RNA helicase 2	DDX21	DFSDITK	7	0	824.392	yes	yes	2		0.020642	98.629	62391000
Q9NR30	Nucleolar RNA helicase 2	DDX21	DFSDITKK	8	1	952.487	yes	yes	2		0.00077872	159.28	49153000
Q9NR30	Nucleolar RNA helicase 2	DDX21	DVESYIHR	8	0	1017.49	yes	yes	2		0.00017706	171.38	158610000
Q9NR30	Nucleolar RNA helicase 2	DDX21	EEPSQNDISPK	11	0	1242.57	yes	yes	2		0.0029471	108.98	1035700
Q9NR30	Nucleolar RNA helicase 2	DDX21	GRAPQVLVLAPTR	13	1	1376.83	yes	yes	2	3	0.00052588	161.87	24485000
Q9NR30	Nucleolar RNA helicase 2	DDX21	IGVPSATEIIK	11	0	1126.66	yes	yes	2		0.029765	75.566	220470000
Q9NR30	Nucleolar RNA helicase 2	DDX21	KEEPSQNDISPK	12	1	1370.67	yes	yes	2	3	0.0030961	109.16	686740
Q9NR30	Nucleolar RNA helicase 2	DDX21	KKEEPSQNDISPK	13	2	1498.76	yes	yes	2	3	2.5912e-08	211.82	26776000
Q9NR30	Nucleolar RNA helicase 2	DDX21	LHGELQDR	8	0	966.488	yes	yes	2		0.0019777	134.77	23498000
Q9NR30	Nucleolar RNA helicase 2	DDX21	LLDSVPPTAISHFK	14	0	1523.83	yes	yes	2	3	0.0027849	98.368	191520000
Q9NR30	Nucleolar RNA helicase 2	DDX21	LRSDAGLESDTAMK	14	1	1492.72	yes	yes	2	3	0.0038124	117.13	5098200
Q9NR30	Nucleolar RNA helicase 2	DDX21	NEEPSEEEIDAPK	13	0	1485.65	yes	yes	2		4.293e-08	186.29	4822300
Q9NR30	Nucleolar RNA helicase 2	DDX21	NEEPSEEEIDAPKPK	15	1	1710.79	yes	yes	3		0.00013025	143.56	116740000
Q9NR30	Nucleolar RNA helicase 2	DDX21	RIGVPSATEIIK	12	1	1282.76	yes	yes	3		0.042997	46.796	6343400
Q9NR30	Nucleolar RNA helicase 2	DDX21	RWQLSVATEQPELEGPR	17	1	1995.02	yes	yes	3		1.5714e-07	169.02	9756100
Q9NR30	Nucleolar RNA helicase 2	DDX21	SDKTEEIAEEEETVFPK	17	1	1979.92	yes	yes	2	3	7.1693e-16	240.34	61477000
Q9NR30	Nucleolar RNA helicase 2	DDX21	TAITVEHLAIK	11	0	1194.7	yes	yes	2	3	1.6908e-07	190.57	384230000
Q9NR30	Nucleolar RNA helicase 2	DDX21	TEEIAEEEETVFPK	14	0	1649.77	yes	yes	2		2.4547e-11	206.66	2642400
Q9NR30	Nucleolar RNA helicase 2	DDX21	TFHHVYSGK	9	0	1074.52	yes	yes	2	3	9.5872e-05	169.65	131850000
Q9NR30	Nucleolar RNA helicase 2	DDX21	TFSFAIPLIEK	11	0	1264.71	yes	yes	2		1.9238e-07	186.74	174530000
Q9NR30	Nucleolar RNA helicase 2	DDX21	VTKNEEPSEEEIDAPKPK	18	2	2039.01	yes	yes	4		0.039062	67.994	8044500
Q9NXF1	Testis-expressed sequence 10 protein	TEX10	THMLTNAILVQQIIK	15	0	1721.99	yes	yes	2	3	3.786e-08	179.55	13522000		+
Q9NXF1	Testis-expressed sequence 10 protein	TEX10	SQNFDILQSAISK	13	0	1449.75	yes	yes	2		6.9607e-12	221.85	26544000	+
Q9NXF1	Testis-expressed sequence 10 protein	TEX10	EELTWLQSLR	10	0	1273.67	yes	yes	2		9.2656e-10	206.49	8200500	+
Q9NXF1	Testis-expressed sequence 10 protein	TEX10	LLLQHAPLR	9	0	1059.66	yes	yes	2	3	0.001287	131.22	33022000	+
Q9NXF1	Testis-expressed sequence 10 protein	TEX10	LQNATPTNFK	10	0	1132.59	yes	yes	2		2.0654e-07	197.79	18108000	+
Q9NXF1	Testis-expressed sequence 10 protein	TEX10	LAAVQLLQFLAPK	13	0	1410.86	yes	yes	2	3	0.014052	76.165	1458400	+
Q9NXF1	Testis-expressed sequence 10 protein	TEX10	NPELSTQLIDIIHTAAAR	18	0	1962.05	yes	yes	2	3	1.1387e-27	271.73	55532000	+
Q9NXF1	Testis-expressed sequence 10 protein	TEX10	AVYTLYQQR	9	0	1140.59	yes	yes	2		1.7161e-06	195.32	10979000
Q9NXF1	Testis-expressed sequence 10 protein	TEX10	DLLSQMHHYNAGVK	14	0	1611.78	yes	yes	3	4	0.0012884	110.64	26216000
Q9NXF1	Testis-expressed sequence 10 protein	TEX10	ENPHATSNSIFINWK	15	0	1756.85	yes	yes	3		0.0025938	88.092	1832400
Q9NXF1	Testis-expressed sequence 10 protein	TEX10	ESEGLQEQK	9	0	1046.49	yes	yes	2		0.029291	78.264	135840
Q9NXF1	Testis-expressed sequence 10 protein	TEX10	FLQALADGSSR	11	0	1163.59	yes	yes	2		0.00040168	136.01	16897000
Q9NXF1	Testis-expressed sequence 10 protein	TEX10	FVTETLEDGSR	11	0	1252.59	yes	yes	2		9.3557e-08	196.16	19813000
Q9NXF1	Testis-expressed sequence 10 protein	TEX10	IYDPQEGAVVVLPADSQQR	19	0	2084.05	yes	yes	2	3	4.8436e-07	149.93	11520000
Q9NXF1	Testis-expressed sequence 10 protein	TEX10	IYQTEELR	8	0	1050.53	yes	yes	2		0.00023505	166.09	16146000
Q9NXF1	Testis-expressed sequence 10 protein	TEX10	KFVTETLEDGSR	12	1	1380.69	yes	yes	3		0.00086432	117.86	3276100
Q9NXF1	Testis-expressed sequence 10 protein	TEX10	KNYLIDFK	8	1	1039.57	yes	yes	2		0.0029478	129.42	3286400
Q9NXF1	Testis-expressed sequence 10 protein	TEX10	LLGVSWR	7	0	829.481	yes	yes	2		0.019831	99.375	7815500
Q9NXF1	Testis-expressed sequence 10 protein	TEX10	LMLQSLR	7	0	859.495	yes	yes	2		0.030545	87.181	8152200
Q9NXF1	Testis-expressed sequence 10 protein	TEX10	LMQIQPNR	8	0	998.533	yes	yes	2		0.0083587	104.75	1320200
Q9NXF1	Testis-expressed sequence 10 protein	TEX10	LMQIQPNREDTETLIK	16	1	1928	yes	yes	3		0.0084865	86.498	15478000
Q9NXF1	Testis-expressed sequence 10 protein	TEX10	LRESEGLQEQK	11	1	1315.67	yes	yes	3		8.437e-05	160.91	7018500
Q9NXF1	Testis-expressed sequence 10 protein	TEX10	NFVELISHQQLSK	13	0	1541.82	yes	yes	2	3	4.5793e-20	256.13	29665000
Q9NXF1	Testis-expressed sequence 10 protein	TEX10	NYLIDFK	7	0	911.475	yes	yes	2		0.013267	104.44	5755600
Q9NXF1	Testis-expressed sequence 10 protein	TEX10	SLQATALR	8	0	858.492	yes	yes	2		0.0028231	131.62	19847000
Q9NXF1	Testis-expressed sequence 10 protein	TEX10	SQSWILSVNPNR	12	0	1399.72	yes	yes	2		0.00042951	131.32	2546400
Q9NXF1	Testis-expressed sequence 10 protein	TEX10	TIHLPEQLK	9	0	1077.62	yes	yes	3		0.025095	74.173	2426700
Q9NXF1	Testis-expressed sequence 10 protein	TEX10	TIHLPEQLKEDGTLPTNNR	19	1	2175.13	yes	yes	3		0.00089752	103.73	4515000
Q9NXF1	Testis-expressed sequence 10 protein	TEX10	VGPEELPVVGQLLR	14	0	1504.86	yes	yes	3		0.00092308	116.71	362540
Q9NXF1	Testis-expressed sequence 10 protein	TEX10	VLDILLEQYPALITGR	16	0	1813.03	yes	yes	3		5.0113e-06	146.27	1810400
Q9NXF1	Testis-expressed sequence 10 protein	TEX10	WLAGLPLQLAHLGSR	15	0	1630.93	yes	yes	2	3	0.00015715	133.04	9568800
Q9NXF1	Testis-expressed sequence 10 protein	TEX10	YLVGGLSGVDEGLSSTENLK	20	0	2037.03	yes	yes	3		0.00083241	98.077	5337500
Q9P2E5	Chondroitin sulfate glucuronyltransferase	CHPF2	ADVGDALETALEQLNR	16	0	1713.85	yes	yes	2	3	2.8716e-16	238.02	749820
Q9P2E5	Chondroitin sulfate glucuronyltransferase	CHPF2	LLVAVLTSR	9	0	970.618	yes	yes	2		0.013334	96.665	678470
Q9UHI6	Probable ATP-dependent RNA helicase DDX20	DDX20	IPFNQALVFSNLHSR	15	0	1741.93	yes	yes	3		1.5835e-06	163.62	1237500
Q9UHI6	Probable ATP-dependent RNA helicase DDX20	DDX20	TGDVLLAEPADFESLLLSR	19	0	2045.07	yes	yes	2	3	2.3748e-05	129.43	509990
Q9UHI6	Probable ATP-dependent RNA helicase DDX20	DDX20	VLISTDLTSR	10	0	1103.62	yes	yes	2		0.013384	90.913	756130
Q9UKN8	General transcription factor 3C polypeptide 4	GTF3C4	DPTVSQTFMLDR	12	0	1408.67	yes	yes	2		6.2812e-08	179.83	5263200		+
Q9UKN8	General transcription factor 3C polypeptide 4	GTF3C4	IEAVEMHLTR	10	0	1197.62	yes	yes	2	3	0.0002368	141.89	35951000		+
Q9UKN8	General transcription factor 3C polypeptide 4	GTF3C4	ILYQSMQK	8	0	1009.53	yes	yes	2		0.00071565	153.08	5556200		+
Q9UKN8	General transcription factor 3C polypeptide 4	GTF3C4	MSGLIVGSAFGPIK	14	0	1375.75	yes	yes	2		1.2925e-08	198.29	14936000		+
Q9UKN8	General transcription factor 3C polypeptide 4	GTF3C4	TFEEAAAQLLESSVQNLFK	19	0	2124.07	yes	yes	2	3	5.4355e-14	195.96	0	+
Q9UKN8	General transcription factor 3C polypeptide 4	GTF3C4	NYQVQFVTLK	10	0	1238.67	yes	yes	2		4.2371e-06	176.48	21954000	+
Q9UKN8	General transcription factor 3C polypeptide 4	GTF3C4	QVDLIDLVR	9	0	1069.61	yes	yes	2		9.4747e-05	169.93	12174000	+
Q9UKN8	General transcription factor 3C polypeptide 4	GTF3C4	AGLNVHNSHVTGLHSLPIVSMTADK	25	0	2597.34	yes	yes	4		0.034554	38.592	3236100
Q9UKN8	General transcription factor 3C polypeptide 4	GTF3C4	DKHIPQFLQEALEK	14	1	1694.9	yes	yes	3		7.3277e-05	156.2	3904400
Q9UKN8	General transcription factor 3C polypeptide 4	GTF3C4	EILPFTDR	8	0	989.518	yes	yes	2		0.01303	99.442	11900000
Q9UKN8	General transcription factor 3C polypeptide 4	GTF3C4	EILPFTDRK	9	1	1117.61	yes	yes	3		0.018223	72.879	3657900
Q9UKN8	General transcription factor 3C polypeptide 4	GTF3C4	EMDQLPVHSIK	11	0	1295.65	yes	yes	2		1.7064e-05	160.86	4349100
Q9UKN8	General transcription factor 3C polypeptide 4	GTF3C4	HIPQFLQEALEK	12	0	1451.78	yes	yes	2	3	0.00093996	116.74	11594000
Q9UKN8	General transcription factor 3C polypeptide 4	GTF3C4	HPAPEDPDWIKR	12	1	1459.72	yes	yes	3		0.0012108	107.34	7265600
Q9UKN8	General transcription factor 3C polypeptide 4	GTF3C4	HSMQTPVR	8	0	954.471	yes	yes	2		0.0050396	115.49	1183400
Q9UKN8	General transcription factor 3C polypeptide 4	GTF3C4	IESSGVTYFWR	11	0	1343.65	yes	yes	2		0.0020714	113.22	867440
Q9UKN8	General transcription factor 3C polypeptide 4	GTF3C4	ILLVDSPGMGNADDEQQEEGTSSK	24	0	2519.13	yes	yes	3		2.9874e-19	210.66	1670800
Q9UKN8	General transcription factor 3C polypeptide 4	GTF3C4	LLEIQGK	7	0	799.48	yes	yes	2		0.021299	98.523	21915000
Q9UKN8	General transcription factor 3C polypeptide 4	GTF3C4	LQYAVSGLEPLAWSEDHR	18	0	2070.02	yes	yes	2		0.00011973	113.81	737960
Q9UKN8	General transcription factor 3C polypeptide 4	GTF3C4	LSDVFGSVR	9	0	978.513	yes	yes	2		0.012567	97.472	25940000
Q9UKN8	General transcription factor 3C polypeptide 4	GTF3C4	LTIQANLNR	9	0	1041.59	yes	yes	2		1.9676e-09	229.55	15949000
Q9UKN8	General transcription factor 3C polypeptide 4	GTF3C4	LYETSYR	7	0	930.445	yes	yes	2		0.0049264	125.25	19910000
Q9UKN8	General transcription factor 3C polypeptide 4	GTF3C4	NEAPEGNLGDFAEFQR	16	0	1792.8	yes	yes	3		6.3598e-12	205.33	1718800
Q9UKN8	General transcription factor 3C polypeptide 4	GTF3C4	QLIPIFTDVALK	12	0	1356.8	yes	yes	2		6.9488e-06	166.7	6387000
Q9UKN8	General transcription factor 3C polypeptide 4	GTF3C4	SKEGDVEEPTDDSLPTTGDAGGR	23	1	2332.03	yes	yes	3		0.0052475	89.47	2380500
Q9UKN8	General transcription factor 3C polypeptide 4	GTF3C4	SKEGDVEEPTDDSLPTTGDAGGREPMEEK	29	2	3075.35	yes	yes	3	4	9.1374e-06	142.14	20203000
Q9UKN8	General transcription factor 3C polypeptide 4	GTF3C4	TPSEALWKPTHEDSK	15	1	1724.84	yes	yes	3	4	0.0078309	90.689	11799000
Q9UKN8	General transcription factor 3C polypeptide 4	GTF3C4	VGPADDGPAPSGEEEGEGGGEAGGK	25	0	2224.94	yes	yes	2	3	8.8814e-15	198.35	2241500
Q9UKN8	General transcription factor 3C polypeptide 4	GTF3C4	VGPADDGPAPSGEEEGEGGGEAGGKEPAADAAPGPSAAFR	40	1	3633.61	yes	yes	3	4	1.4787e-06	119.41	7989000
Q9UKN8	General transcription factor 3C polypeptide 4	GTF3C4	VLIGHISK	8	0	865.539	yes	yes	2		0.0040203	123.98	10948000
Q9UL63	Muskelin	MKLN1	ATIDPELNEIHVLSGLSK	18	0	1935.03	yes	yes	3		0.017532	67.902	1510900
Q9UL63	Muskelin	MKLN1	GNLVDLITL	9	0	956.554	yes	yes	1		0.033693	58.604	278030
Q9Y2G8	DnaJ homolog subfamily C member 16	DNAJC16	AYEILSNEEKR	11	1	1350.68	yes	yes	2		0.02591	79.07	0	+
Q9Y2G8	DnaJ homolog subfamily C member 16	DNAJC16	FILLGYLDQLR	11	0	1349.77	yes	yes	2		0.023694	72.34	71238
Q9Y2G8	DnaJ homolog subfamily C member 16	DNAJC16	ISFFHNAVVR	10	0	1188.64	yes	yes	3		0.04501	59.908	1280500
Q9Y2X0	Mediator of RNA polymerase II transcription subunit 16	MED16	APTLPGSAATLQLDGLAR	18	0	1750.96	yes	yes	2	3	5.0307e-17	240.34	6161100
Q9Y2X0	Mediator of RNA polymerase II transcription subunit 16	MED16	DGTSLGMLR	9	0	948.47	yes	yes	2		0.0041421	112.11	1463000
Q9Y2X0	Mediator of RNA polymerase II transcription subunit 16	MED16	DKFPAITHLK	10	1	1168.66	yes	yes	3		0.013173	91.469	3005200
Q9Y2X0	Mediator of RNA polymerase II transcription subunit 16	MED16	EGLPVNNIFQQISPVVGDK	19	0	2053.08	yes	yes	2		6.3082e-09	163.11	1373500
Q9Y2X0	Mediator of RNA polymerase II transcription subunit 16	MED16	IDTEILPSLFMR	12	0	1433.76	yes	yes	2		0.0019436	113.24	1113400
Q9Y2X0	Mediator of RNA polymerase II transcription subunit 16	MED16	ILSATNDLDR	10	0	1116.58	yes	yes	2		3.7186e-07	190.26	8775300
Q9Y2X0	Mediator of RNA polymerase II transcription subunit 16	MED16	ITDVDIDK	8	0	917.471	yes	yes	2		0.010625	104.01	2593100
Q9Y2X0	Mediator of RNA polymerase II transcription subunit 16	MED16	LLSADADGQIK	11	0	1129.6	yes	yes	2		0.00046873	133.42	4118100
Q9Y2X0	Mediator of RNA polymerase II transcription subunit 16	MED16	LPISLTNTDLK	11	0	1213.69	yes	yes	2		1.7935e-07	189.17	8783700
Q9Y2X0	Mediator of RNA polymerase II transcription subunit 16	MED16	LSPSMGHPLEVGLALR	16	0	1675.91	yes	yes	3		0.041265	57.53	2846400
Q9Y2X0	Mediator of RNA polymerase II transcription subunit 16	MED16	SLLRPHFLNTPDK	13	1	1536.84	yes	yes	3		0.027024	73.415	0
Q9Y2X0	Mediator of RNA polymerase II transcription subunit 16	MED16	VSAVALPK	8	0	783.485	yes	yes	2		0.024602	90.709	1326800
Q9Y4W2	Ribosomal biogenesis protein LAS1L	LAS1L	AMGQGLPDEEQEK	13	0	1430.63	yes	yes	2		0.00037897	134.06	20819000		+
Q9Y4W2	Ribosomal biogenesis protein LAS1L	LAS1L	LLYGMALVR	9	0	1034.59	yes	yes	2		8.5386e-05	172.14	18602000		+
Q9Y4W2	Ribosomal biogenesis protein LAS1L	LAS1L	MLSELPALGISGIRPTYILR	20	1	2199.24	yes	yes	3		0.013008	84.508	12760000		+
Q9Y4W2	Ribosomal biogenesis protein LAS1L	LAS1L	MPGQTEDPAELMLENYDTMYLLDQPVLEQR	30	0	3538.63	yes	yes	3		0.042456	52.96	0	+	+
Q9Y4W2	Ribosomal biogenesis protein LAS1L	LAS1L	SGNELPLAVASTADLIR	17	0	1725.93	yes	yes	2	3	0.00010004	148.52	3222200	+
Q9Y4W2	Ribosomal biogenesis protein LAS1L	LAS1L	GLHSQNFTQALLER	14	0	1612.83	yes	yes	2	3	1.2612e-05	156	42356000	+
Q9Y4W2	Ribosomal biogenesis protein LAS1L	LAS1L	AQQQEEQGSVNDVKEEEKEEK	21	2	2460.13	yes	yes	3	4	2.7212e-05	137.52	16841000
Q9Y4W2	Ribosomal biogenesis protein LAS1L	LAS1L	AWNNPSPR	8	0	940.452	yes	yes	2		0.0060585	109.48	2804800
Q9Y4W2	Ribosomal biogenesis protein LAS1L	LAS1L	EGIEEEDQEEDKNIVVDDITEQKPEPQDDGK	31	2	3569.6	yes	yes	4		0.042866	59.011	4928900
Q9Y4W2	Ribosomal biogenesis protein LAS1L	LAS1L	ELLVSYEEEQFTVLEK	16	0	1954.98	yes	yes	2		1.2685e-11	197.15	660600
Q9Y4W2	Ribosomal biogenesis protein LAS1L	LAS1L	FSAGQWEAR	9	0	1050.49	yes	yes	2		6.9262e-09	213.8	3369800
Q9Y4W2	Ribosomal biogenesis protein LAS1L	LAS1L	FVNLISER	8	0	976.534	yes	yes	2		0.013656	99.013	35696000
Q9Y4W2	Ribosomal biogenesis protein LAS1L	LAS1L	GALQGSAWQVSSEDVR	16	0	1688.81	yes	yes	2		3.6666e-21	257.46	6252200
Q9Y4W2	Ribosomal biogenesis protein LAS1L	LAS1L	GSLPLSAHGIVVAWLSR	17	0	1761.99	yes	yes	3		5.4023e-05	130.27	779770
Q9Y4W2	Ribosomal biogenesis protein LAS1L	LAS1L	LLDVTGGLGTDELR	14	0	1457.77	yes	yes	2		7.2662e-17	250.81	42873000
Q9Y4W2	Ribosomal biogenesis protein LAS1L	LAS1L	MLSELPALGISGIR	14	0	1455.81	yes	yes	2		0.00034105	135.91	1106000
Q9Y4W2	Ribosomal biogenesis protein LAS1L	LAS1L	PFSQFWQPLLR	11	0	1417.75	yes	yes	2		5.1161e-11	223.87	1366900
Q9Y4W2	Ribosomal biogenesis protein LAS1L	LAS1L	SPYTLDSLYWSVKPASSSFGSEAK	24	1	2606.25	yes	yes	3		0.00030192	106.35	7963800
Q9Y4W2	Ribosomal biogenesis protein LAS1L	LAS1L	WDTFPLGR	8	0	990.492	yes	yes	2		0.037357	77.318	4668600
Q9Y4W6	AFG3-like protein 2	AFG3L2	GMGGLFSVGETTAK	14	0	1353.66	yes	yes	2		5.7121e-06	157.33	13001000		+
Q9Y4W6	AFG3-like protein 2	AFG3L2	HFEQAIER	8	0	1028.5	yes	yes	2		3.1656e-06	199.89	29314000	+
Q9Y4W6	AFG3-like protein 2	AFG3L2	VGQISFDLPR	10	0	1130.61	yes	yes	2		3.2083e-05	158.56	27636000	+
Q9Y4W6	AFG3-like protein 2	AFG3L2	NLETLQQELGIEGENR	16	0	1841.91	yes	yes	2	3	9.7286e-61	387.43	28465000	+
Q9Y4W6	AFG3-like protein 2	AFG3L2	DFVNNYLSK	9	0	1098.53	yes	yes	2		9.0003e-05	169.93	15713000
Q9Y4W6	AFG3-like protein 2	AFG3L2	DLFALAR	7	0	804.449	yes	yes	2		0.0072726	117.93	17487000
Q9Y4W6	AFG3-like protein 2	AFG3L2	EVLDKNDMVELLGPR	15	1	1726.89	yes	yes	3		6.3676e-05	154.1	5063100
Q9Y4W6	AFG3-like protein 2	AFG3L2	GAILTGPPGTGK	12	0	1067.6	yes	yes	2		0.048149	71.153	24601000
Q9Y4W6	AFG3-like protein 2	AFG3L2	GLGYAQYLPK	10	0	1108.59	yes	yes	2		0.00019207	146.79	10830000
Q9Y4W6	AFG3-like protein 2	AFG3L2	HLSDSINQK	9	0	1040.53	yes	yes	2		0.0020693	125.71	5618800
Q9Y4W6	AFG3-like protein 2	AFG3L2	ILINDAYK	8	0	948.528	yes	yes	2		0.0060865	109.11	23595000
Q9Y4W6	AFG3-like protein 2	AFG3L2	ILINDAYKR	9	1	1104.63	yes	yes	2	3	0.0023717	124.92	11383000
Q9Y4W6	AFG3-like protein 2	AFG3L2	ITTGAQDDLR	10	0	1088.55	yes	yes	2		1.4922e-05	172.21	12350000
Q9Y4W6	AFG3-like protein 2	AFG3L2	ITTGAQDDLRK	11	1	1216.64	yes	yes	2	3	0.0014942	126.71	18666000
Q9Y4W6	AFG3-like protein 2	AFG3L2	KTQVLQPEEK	10	1	1198.66	yes	yes	2		1.7903e-05	172.61	1604800
Q9Y4W6	AFG3-like protein 2	AFG3L2	KVTQSAYAQIVQFGMNEK	18	1	2041.03	yes	yes	3		0.00023126	114.21	1254300
Q9Y4W6	AFG3-like protein 2	AFG3L2	LEIMEFVNFLK	11	0	1381.73	yes	yes	2		0.0003713	132.32	344840
Q9Y4W6	AFG3-like protein 2	AFG3L2	LIDDEVR	7	0	858.445	yes	yes	2		0.0072123	116.9	32052000
Q9Y4W6	AFG3-like protein 2	AFG3L2	QGDMVLEKPYSEATAR	16	1	1793.86	yes	yes	3		0.046147	57.788	0
Q9Y4W6	AFG3-like protein 2	AFG3L2	QIFIGPPDIK	10	0	1126.64	yes	yes	2		0.0033759	105.98	3525700
Q9Y4W6	AFG3-like protein 2	AFG3L2	STYEEFVEGTGSLDEDTSLPEGLKDWNK	28	1	3145.43	yes	yes	3		1.5631e-05	112.57	819260
Q9Y4W6	AFG3-like protein 2	AFG3L2	TQVLQPEEK	9	0	1070.56	yes	yes	2		0.0012705	131.09	9813800
Q9Y4W6	AFG3-like protein 2	AFG3L2	VALLLLEK	8	0	897.59	yes	no	2		0.001839	138.54	31749000
Q9Y4W6	AFG3-like protein 2	AFG3L2	VLKDEIDVK	9	1	1057.6	yes	yes	2	3	0.0010519	154.84	44537000
Q9Y4W6	AFG3-like protein 2	AFG3L2	VSEEIFFGR	9	0	1082.54	yes	yes	2		0.00084796	140.45	15139000
Q9Y4W6	AFG3-like protein 2	AFG3L2	VTQSAYAQIVQFGMNEK	17	0	1912.94	yes	yes	2	3	1.2923e-21	254.59	6588700
Q9Y5L0	Transportin-3	TNPO3	SVDPENNPTLVEVLEGVVR	19	0	2065.07	yes	yes	3		0.0015935	102.08	0	+
Q9Y5L0	Transportin-3	TNPO3	SLDSFLLSPEAAVGLLK	17	0	1758.98	yes	yes	2		0.0023514	99.344	207770
Q9Y5Q9	General transcription factor 3C polypeptide 3	GTF3C3	AIFAVLTSVLTK	12	0	1261.76	yes	yes	2		2.3391e-11	216.91	2466900
Q9Y5Q9	General transcription factor 3C polypeptide 3	GTF3C3	ALEALEPMYDPDTLAQDANAAQQELK	26	0	2844.35	yes	yes	3		4.769e-06	111.56	977630
Q9Y5Q9	General transcription factor 3C polypeptide 3	GTF3C3	DDWWNLLLK	9	0	1201.61	yes	yes	2		0.00028877	126.07	0
Q9Y5Q9	General transcription factor 3C polypeptide 3	GTF3C3	HALGQYVQAFR	11	0	1288.67	yes	yes	2		0.031864	70.942	756260
Q9Y5Q9	General transcription factor 3C polypeptide 3	GTF3C3	HALIVQGFSFLNR	13	0	1500.82	yes	yes	3		0.00029954	129.74	1003700
Q9Y5Q9	General transcription factor 3C polypeptide 3	GTF3C3	ISLSTLQQQLGQPEK	15	0	1668.9	yes	yes	2		1.3258e-11	210.02	2311900
Q9Y5Q9	General transcription factor 3C polypeptide 3	GTF3C3	STLLFSQGK	9	0	979.534	yes	yes	2		0.043439	73.841	1549300
Q9Y5Q9	General transcription factor 3C polypeptide 3	GTF3C3	SYYEANDVTSAINIIDEAFSK	21	0	2349.1	yes	yes	2	3	8.32e-11	176.57	614910
Q9Y5Q9	General transcription factor 3C polypeptide 3	GTF3C3	VVDLAPLHLDAR	12	0	1317.74	yes	yes	2	3	0.013477	86.262	7171100
Q9Y678	Coatomer subunit gamma-1	COPG1	ALQQYTLEPSEKPFDLK	17	1	2006.04	yes	yes	3		0.027534	65.565	1440400
Q9Y678	Coatomer subunit gamma-1	COPG1	NTHTLLLAGVFR	12	0	1340.76	yes	yes	3		0.039402	61.235	1593800
Q9Y678	Coatomer subunit gamma-1	COPG1	SIATLAITTLLK	12	0	1243.78	yes	no	2		1.5056e-05	158.01	4012700
Q9Y678	Coatomer subunit gamma-1	COPG1	SSPEPVALTESETEYVIR	18	0	2005.98	yes	yes	2		3.2646e-12	199.05	1281700
Q9Y678	Coatomer subunit gamma-1	COPG1	SVPLATAPMAEQR	13	0	1369.7	yes	yes	2		0.03494	38.995	477610
Q9Y678	Coatomer subunit gamma-1	COPG1	TLEEAVGNIVK	11	0	1171.64	yes	yes	2		2.4793e-05	156.01	2221500
Q9Y678	Coatomer subunit gamma-1	COPG1	VFNETPINPR	10	0	1185.61	yes	yes	2		0.00032125	136.96	825160
Q9Y678	Coatomer subunit gamma-1	COPG1	VPSVSSSALVSSLHLLK	17	0	1722.99	yes	yes	3		6.6063e-05	128.73	1967900
Q9Y678	Coatomer subunit gamma-1	COPG1	VVLEHEEVR	9	0	1108.59	yes	yes	3		0.040338	63.816	6781300
Q9Y6U3	Adseverin	SCIN	GAEYVASVLK	10	0	1035.56	yes	yes	2		0.013357	93.561	278220
Q9Y6U3	Adseverin	SCIN	SELIVVEEGSEPSELIK	17	0	1856.96	yes	yes	2		4.2004e-16	218.34	873650
Q9Y6U3	Adseverin	SCIN	SLGGQAVQIR	10	0	1027.58	yes	yes	2		0.0024873	115.7	1224800

## Sheet: Band 2(Protein List)
Protein IDs	Protein names	Gene names	Peptides	Razor + unique peptides	Unique peptides	Sequence coverage [%]	Unique + razor sequence coverage [%]	Unique sequence coverage [%]	Mol. weight [kDa]	Sequence length	PEP	Intensity
O00622	Protein CYR61	CYR61	5	5	5	9.4	9.4	9.4	42.026	381	3.8365e-19	28035000
O15160	DNA-directed RNA polymerases I and III subunit RPAC1	POLR1C	11	11	11	42.8	42.8	42.8	39.249	346	1.0618e-51	133310000
O15372	Eukaryotic translation initiation factor 3 subunit H	EIF3H	13	13	13	33	33	33	39.93	352	6.2792e-57	149720000
O43427	Acidic fibroblast growth factor intracellular-binding protein	FIBP	14	14	14	45.1	45.1	45.1	41.878	364	6.6204e-50	187830000
O75190	DnaJ homolog subfamily B member 6	DNAJB6	4	4	4	16.3	16.3	16.3	36.087	326	1.9647e-17	2885300
O75367	Core histone macro-H2A.1	H2AFY	8	8	8	33.1	33.1	33.1	39.617	372	2.4101e-41	51979000
O75477	Erlin-1	ERLIN1	2	2	2	7.5	7.5	7.5	38.925	346	1.3383e-11	2257200
O75486	Transcription initiation protein SPT3 homolog	SUPT3H	2	2	2	6	6	6	44.361	399	0.00015483	2688300
O75764	Transcription elongation factor A protein 3	TCEA3	2	2	2	7.5	7.5	7.5	38.971	348	3.6956e-07	2059200
O75818	Ribonuclease P protein subunit p40	RPP40	3	3	3	14.9	14.9	14.9	41.833	363	7.2147e-09	3197300
O75821	Eukaryotic translation initiation factor 3 subunit G	EIF3G	2	2	2	9.1	9.1	9.1	35.611	320	1.4872e-06	2118500
O95084	Serine protease 23	PRSS23	3	3	3	12.5	12.5	12.5	43.001	383	1.2848e-08	4489400
O95218	Zinc finger Ran-binding domain-containing protein 2	ZRANB2	2	2	2	8.1	8.1	8.1	36.318	320	3.1066e-05	4475000
O95983	Methyl-CpG-binding domain protein 3	MBD3	5	5	5	17.2	17.2	17.2	32.844	291	1.6919e-16	9804900
P04406	Glyceraldehyde-3-phosphate dehydrogenase	GAPDH	2	2	2	8.7	8.7	8.7	36.053	335	2.691e-07	1267600
P04899	Guanine nucleotide-binding protein G(i) subunit alpha-2	GNAI2	2	2	1	7.3	7.3	4.2	40.45	355	4.8246e-07	7841400
P05198	Eukaryotic translation initiation factor 2 subunit 1	EIF2S1	27	27	27	61.3	61.3	61.3	36.112	315	4.2748e-239	1839000000
P05388	60S acidic ribosomal protein P0	RPLP0	10	10	10	39.1	39.1	39.1	34.273	317	2.4483e-44	144570000
P06748	Nucleophosmin	NPM1	2	2	2	10.2	10.2	10.2	32.575	294	0.00059742	387890
P07195	L-lactate dehydrogenase B chain	LDHB	3	3	3	12.6	12.6	12.6	36.638	334	3.5142e-19	3826200
P07355	Annexin A2	ANXA2	22	22	22	51.6	51.6	51.6	38.604	339	2.9202e-175	328570000
P07910	Heterogeneous nuclear ribonucleoproteins C1/C2	HNRNPC	7	7	7	22.9	22.9	22.9	33.67	306	5.3453e-39	43276000
P08754	Guanine nucleotide-binding protein G(k) subunit alpha	GNAI3	2	1	1	7.3	4.2	4.2	40.532	354	1.9497e-06	851130
P08865	40S ribosomal protein SA	RPSA	9	9	9	40	40	40	32.854	295	9.1771e-53	241430000
P17612	cAMP-dependent protein kinase catalytic subunit alpha	PRKACA	2	2	2	6	6	6	40.589	351	7.0568e-07	2701200
P19387	DNA-directed RNA polymerase II subunit RPB3	POLR2C	6	6	6	36.4	36.4	36.4	31.441	275	1.918e-45	12435000
P19784	Casein kinase II subunit alpha	CSNK2A2	17	17	17	59.4	59.4	59.4	41.213	350	1.3117e-155	320780000
P22087	rRNA 2-O-methyltransferase fibrillarin	FBL	7	7	6	24.9	24.9	21.5	33.784	321	1.5212e-22	78434000
P29372	DNA-3-methyladenine glycosylase	MPG	2	2	2	7	7	7	32.868	298	5.1586e-05	1092100
P29692	Elongation factor 1-delta	EEF1D	3	3	3	17.1	17.1	17.1	31.121	281	5.1685e-24	8495500
P31689	DnaJ homolog subfamily A member 1	DNAJA1	4	4	4	17.6	17.6	17.6	44.868	397	4.2071e-17	5736600
P35249	Replication factor C subunit 4	RFC4	11	11	11	38	38	38	39.681	363	7.2716e-84	82633000
P35250	Replication factor C subunit 2	RFC2	9	9	9	35	35	35	39.157	354	1.455e-82	39547000
P36873	Serine/threonine-protein phosphatase PP1-gamma catalytic subunit	PPP1CC	4	4	1	16.1	16.1	3.1	36.983	323	2.2805e-17	5962600
P40937	Replication factor C subunit 5	RFC5	9	9	9	37.6	37.6	37.6	38.496	340	1.0948e-75	40843000
P40938	Replication factor C subunit 3	RFC3	10	10	10	30.6	30.6	30.6	40.556	356	3.9152e-65	72446000
P43307	Translocon-associated protein subunit alpha	SSR1	3	3	3	11.9	11.9	11.9	32.235	286	1.112e-08	16419000
P46777	60S ribosomal protein L5	RPL5	10	10	10	25.9	25.9	25.9	34.362	297	3.7507e-65	192380000
P47755	F-actin-capping protein subunit alpha-2	CAPZA2	2	1	1	9.8	6.3	6.3	32.949	286	4.1134e-09	666340
P48729	Casein kinase I isoform alpha	CSNK1A1	6	6	6	19.6	19.6	19.6	38.914	337	3.4714e-23	10298000
P49770	Translation initiation factor eIF-2B subunit beta	EIF2B2	7	7	7	23.6	23.6	23.6	38.989	351	3.4801e-28	13335000
P50750	Cyclin-dependent kinase 9	CDK9	5	5	5	12.6	12.6	12.6	42.777	372	6.9843e-16	9268800
P52907	F-actin-capping protein subunit alpha-1	CAPZA1	3	3	2	14	14	10.5	32.922	286	2.0958e-12	4042100
P61160	Actin-related protein 2	ACTR2	2	2	2	6.6	6.6	6.6	44.76	394	4.512e-09	5850900
P61964	WD repeat-containing protein 5	WDR5	4	4	4	17.1	17.1	17.1	36.588	334	3.0008e-27	17910000
P62136	Serine/threonine-protein phosphatase PP1-alpha catalytic subunit	PPP1CA	4	1	1	15.5	2.7	2.7	37.512	330	8.4046e-13	649590
P68133	Actin, alpha skeletal muscle	ACTA1	9	1	1	27.3	4.2	4.2	42.051	377	2.2079e-40	3578300
P78345	Ribonuclease P protein subunit p38	RPP38	4	4	4	18.4	18.4	18.4	31.834	283	4.3351e-22	5370100
P78406	mRNA export factor	RAE1	5	5	5	25	25	25	40.968	368	2.3228e-17	15999000
P82650	28S ribosomal protein S22, mitochondrial	MRPS22	14	14	14	43.1	43.1	43.1	41.28	360	5.2606e-73	96353000
Q01105	Protein SET	SET	2	2	2	7.2	7.2	7.2	33.488	290	3.758e-10	2679200
Q02878	60S ribosomal protein L6	RPL6	10	10	10	34.4	34.4	34.4	32.728	288	5.693e-41	73310000
Q07021	Complement component 1 Q subcomponent-binding protein, mitochondrial	C1QBP	2	2	2	12.1	12.1	12.1	31.362	282	1.7711e-09	4975600
Q13243	Serine/arginine-rich splicing factor 5	SRSF5	2	2	2	9.6	9.6	9.6	31.263	272	1.4644e-08	1895700
Q13347	Eukaryotic translation initiation factor 3 subunit I	EIF3I	11	11	11	45.8	45.8	45.8	36.501	325	1.6195e-49	98473000
Q15024	Exosome complex component RRP42	EXOSC7	4	4	4	18.6	18.6	18.6	31.821	291	1.0259e-34	45658000
Q15365	Poly(rC)-binding protein 1	PCBP1	4	4	2	18	18	10.1	37.497	356	3.0341e-22	55742000
Q15366	Poly(rC)-binding protein 2	PCBP2	4	2	2	14.2	6.6	6.6	38.58	365	2.0516e-15	10038000
Q15629	Translocating chain-associated membrane protein 1	TRAM1	3	3	3	8.6	8.6	8.6	43.071	374	6.0677e-09	9905400
Q16637	Survival motor neuron protein	SMN1	2	2	2	12.2	12.2	12.2	31.848	294	7.7858e-09	2413600
Q16795	NADH dehydrogenase [ubiquinone] 1 alpha subcomplex subunit 9, mitochondrial	NDUFA9	6	6	6	21	21	21	42.509	377	4.8824e-19	4451900
Q3ZCQ8	Mitochondrial import inner membrane translocase subunit TIM50	TIMM50	4	4	4	15.3	15.3	15.3	39.646	353	4.0952e-21	7973700
Q5HYJ3	Protein FAM76B	FAM76B	2	2	2	5.9	5.9	5.9	38.708	339	4.0681e-12	749520
Q6NZI2	Polymerase I and transcript release factor	PTRF	3	3	3	11.3	11.3	11.3	43.476	390	1.094e-14	14365000
Q6P1K8	General transcription factor IIH subunit 2-like protein	GTF2H2C	5	5	5	13.9	13.9	13.9	44.452	395	4.8449e-11	20304000
Q7L2H7	Eukaryotic translation initiation factor 3 subunit M	EIF3M	8	8	8	25.7	25.7	25.7	42.502	374	2.7728e-74	54443000
Q86UT8	Coiled-coil domain-containing protein 84	CCDC84	4	4	4	14.8	14.8	14.8	37.974	332	2.2172e-09	4852500
Q86W42	THO complex subunit 6 homolog	THOC6	10	10	10	37.8	37.8	37.8	37.535	341	2.8796e-53	86854000
Q8IV48	3-5 exoribonuclease 1	ERI1	2	2	2	6.9	6.9	6.9	40.063	349	8.0319e-05	4583900
Q8N0S6	Centromere protein L	CENPL	2	2	2	6.4	6.4	6.4	38.997	344	2.4969e-06	1000200
Q8NET6	Carbohydrate sulfotransferase 13	CHST13	3	3	3	8.8	8.8	8.8	38.919	341	3.2572e-06	4336700
Q8TDN6	Ribosome biogenesis protein BRX1 homolog	BRIX1	19	19	19	54.1	54.1	54.1	41.401	353	5.0329e-101	404050000
Q8WVM0	Dimethyladenosine transferase 1, mitochondrial	TFB1M	10	10	10	32.4	32.4	32.4	39.542	346	2.8264e-66	259620000
Q92785	Zinc finger protein ubi-d4	DPF2	6	6	6	16.4	16.4	16.4	44.155	391	2.3405e-35	80636000
Q969G5	Protein kinase C delta-binding protein	PRKCDBP	9	9	9	30.7	30.7	30.7	27.701	261	3.5491e-47	98429000
Q96AG4	Leucine-rich repeat-containing protein 59	LRRC59	9	9	9	28	28	28	34.93	307	8.1444e-71	88294000
Q96BN2	Transcriptional adapter 1	TADA1	5	5	5	18.2	18.2	18.2	37.381	335	2.1162e-22	9904900
Q96CM3	RNA pseudouridylate synthase domain-containing protein 4	RPUSD4	5	5	5	11.9	11.9	11.9	42.205	377	9.7428e-17	25186000
Q96DI7	U5 small nuclear ribonucleoprotein 40 kDa protein	SNRNP40	11	11	11	43.4	43.4	43.4	39.31	357	1.1235e-57	124360000
Q96DV4	39S ribosomal protein L38, mitochondrial	MRPL38	3	3	3	7.4	7.4	7.4	44.596	380	3.2135e-07	10769000
Q96GD4	Aurora kinase B;Aurora kinase C;Aurora kinase A	AURKB	2	2	2	5.8	5.8	5.8	39.31	344	0.00021214	866670
Q96HE9	Proline-rich protein 11	PRR11	2	2	2	6.1	6.1	6.1	40.085	360	2.5874e-06	2293600
Q96J01	THO complex subunit 3	THOC3	5	5	5	14.2	14.2	14.2	38.771	351	5.1064e-28	59203000
Q96L58	Beta-1,3-galactosyltransferase 6	B3GALT6	4	4	4	14.3	14.3	14.3	37.137	329	1.0207e-15	38331000
Q96MG7	Melanoma-associated antigen G1	NDNL2	3	3	3	12.5	12.5	12.5	34.308	304	3.025e-10	1101200
Q99848	Probable rRNA-processing protein EBP2	EBNA1BP2	5	5	5	22.2	22.2	22.2	34.852	306	5.849e-12	11626000
Q9BYG3	MKI67 FHA domain-interacting nucleolar phosphoprotein	MKI67IP	9	9	9	31.4	31.4	31.4	34.222	293	8.3364e-48	19303000
Q9H147	Deoxynucleotidyltransferase terminal-interacting protein 1	DNTTIP1	7	7	7	26.7	26.7	26.7	37.013	329	1.4073e-48	54950000
Q9H3R5	Centromere protein H	CENPH	2	2	2	11.7	11.7	11.7	28.481	247	9.31e-13	909160
Q9H7B2	Ribosome production factor 2 homolog	RPF2	4	4	4	14.1	14.1	14.1	35.582	306	6.7816e-09	9361100
Q9H9L3	Interferon-stimulated 20 kDa exonuclease-like 2	ISG20L2	4	4	4	13.6	13.6	13.6	39.153	353	1.7413e-10	4894100
Q9NYL9	Tropomodulin-3	TMOD3	12	12	12	40.6	40.6	40.6	39.594	352	1.4485e-67	68799000
Q9NYT0	Pleckstrin-2	PLEK2	2	2	2	9.3	9.3	9.3	39.97	353	8.9276e-08	2064500
Q9UBU8	Mortality factor 4-like protein 1	MORF4L1	4	4	4	16.3	16.3	16.3	41.473	362	2.9569e-21	7759900
Q9UH62	Armadillo repeat-containing X-linked protein 3	ARMCX3	5	5	5	15	15	15	42.5	379	1.753e-15	4582000
Q9UKM9	RNA-binding protein Raly	RALY	3	3	3	10.8	10.8	10.8	32.463	306	8.5827e-10	3261200
Q9Y295	Developmentally-regulated GTP-binding protein 1	DRG1	10	10	10	35.7	35.7	35.7	40.542	367	4.3378e-62	41605000
Q9Y2P8	RNA 3-terminal phosphate cyclase-like protein	RCL1	6	6	6	17.7	17.7	17.7	40.842	373	5.1265e-24	10473000
Q9Y3A4	Ribosomal RNA-processing protein 7 homolog A	RRP7A	8	8	8	34.6	34.6	34.6	32.334	280	2.874e-33	22552000
Q9Y3F4	Serine-threonine kinase receptor-associated protein	STRAP	12	12	12	42.3	42.3	42.3	38.438	350	6.2024e-67	71440000
Q9Y5K5	Ubiquitin carboxyl-terminal hydrolase isozyme L5	UCHL5	2	2	2	7.3	7.3	7.3	37.606	329	1.4989e-05	2745900

## Sheet: Band 2(Peptide List)
Protein IDs	Protein names	Gene names	Sequence	Length	Missed cleavages	Mass	Unique (Groups)	Unique (Proteins)	Charges	Charges	PEP	Score	Intensity	Deamidation (NQ)	Oxidation (M)
O00622	Protein CYR61	CYR61	ILYNPLQGQK	10	0	1172.66	yes	yes	2		3.5674e-08	195.17	8167200	+
O00622	Protein CYR61	CYR61	LFNDIHK	7	0	885.471	yes	yes	2		0.0145	122.74	8033200
O00622	Protein CYR61	CYR61	LPVFGMEPR	9	0	1044.54	yes	yes	2		0.0012431	134.77	2822100
O00622	Protein CYR61	CYR61	NNELIAVGK	9	0	956.529	yes	yes	2		2.93e-05	169.76	13870000
O00622	Protein CYR61	CYR61	RLPVFGMEPR	10	1	1200.64	yes	yes	2	3	0.020363	95.483	3310400
O15160	DNA-directed RNA polymerases I and III subunit RPAC1	POLR1C	ILLAEVPTMAVEK	13	0	1412.79	yes	yes	2		0.00083036	148.89	7068600		+
O15160	DNA-directed RNA polymerases I and III subunit RPAC1	POLR1C	NQGDEEGTEIDTLQFR	16	0	1850.83	yes	yes	2	3	6.4252e-16	254.89	19093000	+
O15160	DNA-directed RNA polymerases I and III subunit RPAC1	POLR1C	DSSDPNELYVNHK	13	0	1516.68	yes	yes	2	3	1.2121e-10	225.63	9843600
O15160	DNA-directed RNA polymerases I and III subunit RPAC1	POLR1C	FLDELDAVQMD	11	0	1294.58	yes	yes	2		0.00099386	120.57	718760
O15160	DNA-directed RNA polymerases I and III subunit RPAC1	POLR1C	FSPVATASYR	10	0	1097.55	yes	yes	2		4.2256e-05	152.69	30166000
O15160	DNA-directed RNA polymerases I and III subunit RPAC1	POLR1C	LGLIPIHADPR	11	0	1200.7	yes	yes	3		0.027525	70.056	44971000
O15160	DNA-directed RNA polymerases I and III subunit RPAC1	POLR1C	LLPDITLLEPVEGEAAEELSR	21	0	2293.21	yes	yes	3		0.00013106	124.98	620320
O15160	DNA-directed RNA polymerases I and III subunit RPAC1	POLR1C	NVHTTDFPGNYSGYDDAWDQDRFEK	25	1	2976.26	yes	yes	4		0.01113	64.522	699680
O15160	DNA-directed RNA polymerases I and III subunit RPAC1	POLR1C	RFLDELDAVQMD	12	1	1450.68	yes	yes	2		0.0048409	106.54	727450
O15160	DNA-directed RNA polymerases I and III subunit RPAC1	POLR1C	VLVYNNTSIVQDEILAHR	18	0	2083.11	yes	yes	2		0.0012754	122.29	667280
O15160	DNA-directed RNA polymerases I and III subunit RPAC1	POLR1C	VVLGEFGVR	9	0	974.555	yes	yes	2		0.0015771	131.62	37831000
O15372	Eukaryotic translation initiation factor 3 subunit H	EIF3H	VDEMSQDIVK	10	0	1162.55	yes	yes	2		4.1508e-10	199.68	10165000		+
O15372	Eukaryotic translation initiation factor 3 subunit H	EIF3H	LFKPPQPPAR	10	1	1149.67	yes	yes	2	3	0.031283	83.647	27708000	+
O15372	Eukaryotic translation initiation factor 3 subunit H	EIF3H	LFMAQALQEYNN	12	0	1440.67	yes	yes	2		1.4289e-11	228.12	7900400	+
O15372	Eukaryotic translation initiation factor 3 subunit H	EIF3H	DFSPEALKK	9	1	1033.54	yes	yes	2		0.0048898	126.24	5713200
O15372	Eukaryotic translation initiation factor 3 subunit H	EIF3H	EFTAQNLGK	9	0	1006.51	yes	yes	2		0.0058372	117.89	18399000
O15372	Eukaryotic translation initiation factor 3 subunit H	EIF3H	EKDFSPEALKK	11	2	1290.68	yes	yes	2		0.015958	103.08	177740
O15372	Eukaryotic translation initiation factor 3 subunit H	EIF3H	SAVADKHELLSLASSNHLGK	20	1	2076.1	yes	yes	3	4	9.5307e-08	209.19	57925000
O15372	Eukaryotic translation initiation factor 3 subunit H	EIF3H	GEPPLPEEDLSK	12	0	1309.64	yes	yes	2		0.0067454	98.368	30154000
O15372	Eukaryotic translation initiation factor 3 subunit H	EIF3H	HELLSLASSNHLGK	14	0	1504.8	yes	yes	3		7.2315e-11	229.56	8583600
O15372	Eukaryotic translation initiation factor 3 subunit H	EIF3H	KSAVADKHELLSLASSNHLGK	21	2	2204.19	yes	yes	4		0.039312	44.743	2400200
O15372	Eukaryotic translation initiation factor 3 subunit H	EIF3H	NLQLLMDR	8	0	1001.53	yes	yes	2		0.00035018	151.44	12778000
O15372	Eukaryotic translation initiation factor 3 subunit H	EIF3H	NSHLINVLMWELEK	14	0	1724.89	yes	yes	3		0.011739	75.589	319510
O15372	Eukaryotic translation initiation factor 3 subunit H	EIF3H	TAQGSLSLK	9	0	903.503	yes	yes	2		0.0098897	110.38	3107800
O43427	Acidic fibroblast growth factor intracellular-binding protein	FIBP	SGILEQTGATAAVLQSDTMDHYR	23	0	2463.17	yes	yes	2	3	0.00048739	100.28	2988200	+	+
O43427	Acidic fibroblast growth factor intracellular-binding protein	FIBP	GSLVDNIQQHFLLSDR	16	0	1840.94	yes	yes	3		0.00048293	131.86	45643000	+
O43427	Acidic fibroblast growth factor intracellular-binding protein	FIBP	DLFVDLVEK	9	0	1076.58	yes	yes	2		5.948e-05	157.99	24236000
O43427	Acidic fibroblast growth factor intracellular-binding protein	FIBP	DYAAIVFFANNR	12	0	1399.69	yes	yes	2		2.6205e-06	176.78	3371800
O43427	Acidic fibroblast growth factor intracellular-binding protein	FIBP	EFLQDLK	7	0	891.47	yes	yes	2		0.016397	120.46	12887000
O43427	Acidic fibroblast growth factor intracellular-binding protein	FIBP	SDHWPLSDVR	10	0	1210.57	yes	yes	3		0.034703	65.719	8463600
O43427	Acidic fibroblast growth factor intracellular-binding protein	FIBP	FFLNQYSASVHSLDGFR	17	0	1986.96	yes	yes	3		0.00016807	148.85	13832000
O43427	Acidic fibroblast growth factor intracellular-binding protein	FIBP	GLVNVAAK	8	0	770.465	yes	yes	2		0.0035553	134.06	12675000
O43427	Acidic fibroblast growth factor intracellular-binding protein	FIBP	LGVFSEMEANFK	12	0	1370.65	yes	yes	2		2.5912e-11	219.92	5063900
O43427	Acidic fibroblast growth factor intracellular-binding protein	FIBP	LLHQLIFQIPPSR	13	0	1560.91	yes	yes	3		0.0067095	85.973	3384300
O43427	Acidic fibroblast growth factor intracellular-binding protein	FIBP	RQFDNFK	7	1	953.472	yes	yes	2		0.038288	98.629	1729300
O43427	Acidic fibroblast growth factor intracellular-binding protein	FIBP	TFHMLER	7	0	932.454	yes	yes	2		0.037942	98.629	11627000
O43427	Acidic fibroblast growth factor intracellular-binding protein	FIBP	VLVADKDLLDLHK	13	1	1477.85	yes	yes	3	4	0.0015299	122.52	78187000
O43427	Acidic fibroblast growth factor intracellular-binding protein	FIBP	YYAFDEAFVR	10	0	1279.59	yes	yes	2		1.3735e-05	163.38	12372000
O75190	DnaJ homolog subfamily B member 6	DNAJB6	SLTINGVADDDALAEER	17	0	1787.85	yes	yes	2		2.4749e-08	149.86	0	+
O75190	DnaJ homolog subfamily B member 6	DNAJB6	APGPWDPLASAAGLK	15	0	1449.76	yes	yes	2		0.012254	90.853	996400
O75190	DnaJ homolog subfamily B member 6	DNAJB6	VDYYEVLGVQR	11	0	1339.68	yes	yes	2		0.00016621	141.1	1130600
O75190	DnaJ homolog subfamily B member 6	DNAJB6	VEVEEDGQLK	10	0	1144.56	yes	no	2		0.00038976	140.78	758250
O75367	Core histone macro-H2A.1	H2AFY	AASADSTTEGTPADGFTVLSTK	22	0	2126	yes	yes	2	3	1.5547e-18	253.52	4827800
O75367	Core histone macro-H2A.1	H2AFY	AGVIFPVGR	9	0	914.534	yes	no	2		0.027778	95.741	16949000
O75367	Core histone macro-H2A.1	H2AFY	AISSYFVSTMSSSIK	15	0	1606.79	yes	yes	2		6.6114e-05	165.34	965420
O75367	Core histone macro-H2A.1	H2AFY	DDLGNTLEK	9	0	1003.48	yes	yes	2		0.0048992	120.27	1545100
O75367	Core histone macro-H2A.1	H2AFY	SIAFPSIGSGR	11	0	1090.58	yes	yes	2		0.0054187	109.39	4595200
O75367	Core histone macro-H2A.1	H2AFY	GVTIASGGVLPNIHPELLAK	20	0	1985.13	yes	yes	2	3	0.00010142	143.67	18331000
O75367	Core histone macro-H2A.1	H2AFY	HILLAVANDEELNQLLK	17	0	1932.07	yes	no	3		2.4757e-05	168.93	2156800
O75367	Core histone macro-H2A.1	H2AFY	NGPLEVAGAAVSAGHGLPAK	20	0	1814.96	yes	yes	2	3	0.00012664	153.17	2609600
O75477	Erlin-1	ERLIN1	EALEPSGENVIQNK	14	0	1526.76	yes	yes	2		3.34e-08	211.77	1360000
O75477	Erlin-1	ERLIN1	ISEIEDAAFLAR	12	0	1333.69	yes	no	2		0.00040067	133.32	897190
O75486	Transcription initiation protein SPT3 homolog	SUPT3H	IGPLSPFTNAYR	12	0	1334.7	yes	yes	2		0.0048235	104.94	1216000
O75486	Transcription initiation protein SPT3 homolog	SUPT3H	VITPEDLLFLMR	12	0	1445.8	yes	yes	2		0.032099	75.819	1472400
O75764	Transcription elongation factor A protein 3	TCEA3	MASEIEDHIYQELK	14	0	1704.8	yes	yes	3		0.0022976	101.72	1293200
O75764	Transcription elongation factor A protein 3	TCEA3	MTAEEMASDELR	12	0	1381.59	yes	yes	2		0.00016085	140.45	766070
O75818	Ribonuclease P protein subunit p40	RPP40	HLVQTHYYNYR	11	0	1492.72	yes	yes	3		0.00025928	125.74	1773800
O75818	Ribonuclease P protein subunit p40	RPP40	LILSLDKDTYEETGLQGHPSQFSGR	25	1	2790.38	yes	yes	4		0.0014622	89.663	1290700
O75818	Ribonuclease P protein subunit p40	RPP40	NLPLHELITPEFISTFIK	18	0	2111.17	yes	yes	3		0.01903	58.712	132830
O75821	Eukaryotic translation initiation factor 3 subunit G	EIF3G	ELAEQLGLSTGEK	13	0	1373.7	yes	yes	2		0.00012577	161.21	1015000
O75821	Eukaryotic translation initiation factor 3 subunit G	EIF3G	ETDLQELFRPFGSISR	16	1	1893.96	yes	yes	3		0.011825	80.371	1103600
O95084	Serine protease 23	PRSS23	DFLLNYPFSTSVK	13	0	1529.78	yes	yes	2		0.00023733	149.57	2252400
O95084	Serine protease 23	PRSS23	GNANDIGMDYDYALLELK	18	0	2013.94	yes	yes	2		0.0015524	113.49	627890
O95084	Serine protease 23	PRSS23	IHFSGYDNDRPGNLVYR	17	1	2021.97	yes	yes	3		0.034872	57.53	1609100
O95218	Zinc finger Ran-binding domain-containing protein 2	ZRANB2	TGYGGGFNER	10	0	1056.46	yes	no	2		0.0069379	108.35	2684100
O95218	Zinc finger Ran-binding domain-containing protein 2	ZRANB2	YKLDEDEDEDDADLSK	16	1	1898.79	yes	no	3		0.0044777	91.14	1790900
O95983	Methyl-CpG-binding domain protein 3	MBD3	AFMVTDEDIR	10	0	1195.55	yes	yes	2		0.00058335	134.84	2660000
O95983	Methyl-CpG-binding domain protein 3	MBD3	KLSGLNAFDIAEELVK	16	1	1745.96	yes	yes	2	3	0.0019158	99.796	969200
O95983	Methyl-CpG-binding domain protein 3	MBD3	KQEELVQQVR	10	1	1255.69	yes	yes	2		0.045827	79.07	362780
O95983	Methyl-CpG-binding domain protein 3	MBD3	LSGLNAFDIAEELVK	15	0	1617.86	yes	yes	2		1.0158e-05	183.75	4668600
O95983	Methyl-CpG-binding domain protein 3	MBD3	YLGGSMDLSTFDFR	14	0	1607.73	yes	yes	2		0.00032522	151.3	1144300
P04406	Glyceraldehyde-3-phosphate dehydrogenase	GAPDH	LVINGNPITIFQER	14	0	1612.89	yes	yes	2		9.3977e-06	141.85	0	+
P04406	Glyceraldehyde-3-phosphate dehydrogenase	GAPDH	GALQNIIPASTGAAK	15	0	1410.78	yes	yes	2		0.028635	81.327	1267600
P04899	Guanine nucleotide-binding protein G(i) subunit alpha-2	GNAI2	IAQSDYIPTQQDVLR	15	0	1745.89	yes	yes	2		0.00041984	149.22	1331600
P04899	Guanine nucleotide-binding protein G(i) subunit alpha-2	GNAI2	LLLLGAGESGK	11	0	1056.62	no	no	2		0.0011492	125.72	6509900
P05198	Eukaryotic translation initiation factor 2 subunit 1	EIF2S1	ENAEVDGDDDAEEMEAK	17	0	1865.71	yes	yes	2		1.0432e-52	342.02	6266800		+
P05198	Eukaryotic translation initiation factor 2 subunit 1	EIF2S1	GVFNVQMEPK	10	0	1147.57	yes	yes	2		1.8911e-07	185.33	217020000	+	+
P05198	Eukaryotic translation initiation factor 2 subunit 1	EIF2S1	RGVFNVQMEPK	11	1	1303.67	yes	yes	2	3	0.00012142	143.24	128130000	+	+
P05198	Eukaryotic translation initiation factor 2 subunit 1	EIF2S1	TEGLSVLSQAMAVIK	15	0	1545.84	yes	yes	2	3	3.9399e-19	273.74	309550000	+	+
P05198	Eukaryotic translation initiation factor 2 subunit 1	EIF2S1	YVMTTTTLER	10	0	1213.6	yes	yes	2		4.119e-10	198.62	264030000		+
P05198	Eukaryotic translation initiation factor 2 subunit 1	EIF2S1	HAVSDPSILDSLDLNEDER	19	0	2124	yes	yes	2	3	8.2212e-19	266.99	89157000	+
P05198	Eukaryotic translation initiation factor 2 subunit 1	EIF2S1	INLIAPPR	8	0	892.549	yes	yes	2		0.012068	116.37	325940000	+
P05198	Eukaryotic translation initiation factor 2 subunit 1	EIF2S1	EVLINNINR	9	0	1083.6	yes	yes	2		2.8654e-14	243.03	69302000	+
P05198	Eukaryotic translation initiation factor 2 subunit 1	EIF2S1	HAVSDPSILDSLDLNEDEREVLINNINR	28	1	3189.59	yes	yes	3	4	7.5944e-08	161.59	0	+
P05198	Eukaryotic translation initiation factor 2 subunit 1	EIF2S1	DEQLESLFQR	10	0	1263.61	yes	yes	2		6.8298e-14	234.67	101940000	+
P05198	Eukaryotic translation initiation factor 2 subunit 1	EIF2S1	HVAEVLEYTKDEQLESLFQR	20	1	2433.22	yes	yes	2	3	1.3529e-14	262.37	142090000	+
P05198	Eukaryotic translation initiation factor 2 subunit 1	EIF2S1	EKGYIDLSK	9	1	1051.56	yes	yes	2		0.017765	105.17	0
P05198	Eukaryotic translation initiation factor 2 subunit 1	EIF2S1	ENAEVDGDDDAEEMEAKAED	20	1	2180.82	yes	yes	2		2.4798e-30	331.98	4985300
P05198	Eukaryotic translation initiation factor 2 subunit 1	EIF2S1	FPEVEDVVMVNVR	13	0	1531.77	yes	yes	2	3	0.0026509	107.99	2545900
P05198	Eukaryotic translation initiation factor 2 subunit 1	EIF2S1	GYIDLSK	7	0	794.417	yes	yes	2		0.024451	113.7	113060000
P05198	Eukaryotic translation initiation factor 2 subunit 1	EIF2S1	HVAEVLEYTK	10	0	1187.62	yes	yes	2		3.9345e-05	152.07	111400000
P05198	Eukaryotic translation initiation factor 2 subunit 1	EIF2S1	PGYGAYDAFK	10	0	1087.5	yes	yes	2		0.0055166	110.38	15833000
P05198	Eukaryotic translation initiation factor 2 subunit 1	EIF2S1	RLTPQAVK	8	1	911.555	yes	yes	2		0.0083423	128.12	99193000
P05198	Eukaryotic translation initiation factor 2 subunit 1	EIF2S1	RPGYGAYDAFK	11	1	1243.6	yes	yes	2	3	5.5286e-05	152.69	239360000
P05198	Eukaryotic translation initiation factor 2 subunit 1	EIF2S1	RVSPEEAIK	9	1	1027.57	yes	yes	2		0.00077516	148.91	24708000
P05198	Eukaryotic translation initiation factor 2 subunit 1	EIF2S1	TAWVFDDK	8	0	980.46	yes	yes	2		0.0067644	123.21	59176000
P05198	Eukaryotic translation initiation factor 2 subunit 1	EIF2S1	TAWVFDDKYK	10	1	1271.62	yes	yes	2	3	0.0011554	150.15	166850000
P05198	Eukaryotic translation initiation factor 2 subunit 1	EIF2S1	TEGLSVLSQAMAVIKEK	17	1	1802.98	yes	yes	3		0.042395	55.66	710440
P05198	Eukaryotic translation initiation factor 2 subunit 1	EIF2S1	TVYSILR	7	0	850.491	yes	yes	2		0.012111	126.28	205030000
P05198	Eukaryotic translation initiation factor 2 subunit 1	EIF2S1	VSPEEAIK	8	0	871.465	yes	yes	2		0.01689	108.74	85366000
P05198	Eukaryotic translation initiation factor 2 subunit 1	EIF2S1	VVTDTDETELAR	12	0	1347.65	yes	yes	2		9.7832e-16	259.18	428390000
P05198	Eukaryotic translation initiation factor 2 subunit 1	EIF2S1	YKRPGYGAYDAFK	13	2	1534.76	yes	yes	3		0.00037522	153.49	12112000
P05388	60S acidic ribosomal protein P0	RPLP0	GTIEILSDVQLIK	13	0	1427.82	yes	no	2		0.000908	148.89	0	+
P05388	60S acidic ribosomal protein P0	RPLP0	IIQLLDDYPK	10	0	1216.67	yes	no	2		1.8641e-07	183.85	48855000	+
P05388	60S acidic ribosomal protein P0	RPLP0	TSFFQALGITTK	12	0	1312.7	yes	no	2		3.6809e-06	172.58	43994000	+
P05388	60S acidic ribosomal protein P0	RPLP0	AFLADPSAFVAAAPVAAATTAAPAAAAAPAK	31	0	2751.46	yes	yes	2	3	5.1337e-06	110.46	15717000
P05388	60S acidic ribosomal protein P0	RPLP0	AVVLMGK	7	0	716.425	yes	yes	2		0.039079	102.98	13199000
P05388	60S acidic ribosomal protein P0	RPLP0	DMLLANK	7	0	803.421	yes	no	2		0.036516	102.77	15128000
P05388	60S acidic ribosomal protein P0	RPLP0	GHLENNPALEK	11	0	1220.61	yes	no	2		1.3616e-05	166.11	48552000
P05388	60S acidic ribosomal protein P0	RPLP0	GNVGFVFTK	9	0	967.513	yes	yes	2		6.1613e-07	179.1	48222000
P05388	60S acidic ribosomal protein P0	RPLP0	GNVGFVFTKEDLTEIR	16	1	1823.94	yes	yes	3		0.00064952	131.08	1567600
P05388	60S acidic ribosomal protein P0	RPLP0	VLALSVETDYTFPLAEK	17	0	1894.99	yes	yes	2	3	9.8442e-07	188.47	2188100
P06748	Nucleophosmin	NPM1	GPSSVEDIK	9	0	930.466	yes	yes	2		0.033198	92.051	203470
P06748	Nucleophosmin	NPM1	MSVQPTVSLGGFEITPPVVLR	21	0	2226.21	yes	yes	2		0.017996	69.255	184420
P07195	L-lactate dehydrogenase B chain	LDHB	LIAPVAEEEATVPNNK	16	0	1693.89	yes	yes	2		5.4506e-06	184	2590800
P07195	L-lactate dehydrogenase B chain	LDHB	MVVESAYEVIK	11	0	1266.65	yes	yes	2		0.00010824	147.28	0
P07195	L-lactate dehydrogenase B chain	LDHB	SLADELALVDVLEDK	15	0	1628.85	yes	yes	2		5.9567e-10	218.68	1235500
P07355	Annexin A2	ANXA2	SYSPYDMLESIR	12	0	1459.67	yes	no	2		2.1643e-08	198.97	41189000		+
P07355	Annexin A2	ANXA2	DALNIETAIK	10	0	1086.59	yes	no	2		4.7439e-08	196.44	53488000	+
P07355	Annexin A2	ANXA2	AEDGSVIDYELIDQDAR	17	0	1907.87	yes	yes	2		1.5997e-09	207.21	10790000	+
P07355	Annexin A2	ANXA2	RAEDGSVIDYELIDQDAR	18	1	2063.98	yes	yes	2	3	1.5478e-13	237.66	62995000	+
P07355	Annexin A2	ANXA2	QDIAFAYQR	9	0	1110.55	yes	yes	2		3.7924e-05	180.09	0	+
P07355	Annexin A2	ANXA2	TPAQYDASELK	11	0	1221.59	yes	no	2		2.1704e-06	171.62	44703000	+
P07355	Annexin A2	ANXA2	GVDEVTIVNILTNR	14	0	1541.84	yes	yes	2	3	1.6439e-25	264.58	10732000	+
P07355	Annexin A2	ANXA2	TNQELQEINR	10	0	1243.62	yes	no	2		1.6572e-10	211.37	49770000	+
P07355	Annexin A2	ANXA2	SLYYYIQQDTK	11	0	1420.69	yes	no	2		1.0475e-20	267.07	73017000	+
P07355	Annexin A2	ANXA2	AYTNFDAER	9	0	1085.48	yes	no	2		2.4576e-10	214.71	36295000
P07355	Annexin A2	ANXA2	AYTNFDAERDALNIETAIK	19	1	2154.06	yes	no	2	3	0.00015896	151.59	25618000
P07355	Annexin A2	ANXA2	DIISDTSGDFR	11	0	1224.56	yes	no	2		1.3953e-07	194.48	12913000
P07355	Annexin A2	ANXA2	DIISDTSGDFRK	12	1	1352.66	yes	no	2	3	1.3515e-11	237.76	20695000
P07355	Annexin A2	ANXA2	DLYDAGVK	8	0	879.434	yes	yes	2		0.0095885	120.87	23181000
P07355	Annexin A2	ANXA2	DLYDAGVKR	9	1	1035.53	yes	yes	2		0.0082439	114.89	5773600
P07355	Annexin A2	ANXA2	LSLEGDHSTPPSAYGSVK	18	0	1843.9	yes	no	2		1.0136e-13	243.99	6221300
P07355	Annexin A2	ANXA2	SALSGHLETVILGLLK	16	0	1649.97	yes	no	2	3	2.8027e-07	204.67	13049000
P07355	Annexin A2	ANXA2	SYSPYDMLESIRK	13	1	1587.76	yes	no	2	3	0.0083097	94.547	4184900
P07355	Annexin A2	ANXA2	TDLEKDIISDTSGDFR	16	1	1810.86	yes	no	2	3	0.00025894	180.02	36830000
P07355	Annexin A2	ANXA2	TDLEKDIISDTSGDFRK	17	2	1938.95	yes	no	2	3	1.8319e-07	228.99	79079000
P07355	Annexin A2	ANXA2	TKGVDEVTIVNILTNR	16	1	1770.98	yes	yes	3		0.00010158	173.71	5142000
P07355	Annexin A2	ANXA2	WISIMTER	8	0	1034.52	yes	no	2		0.0073822	120.87	18404000
P07910	Heterogeneous nuclear ribonucleoproteins C1/C2	HNRNPC	SDVEAIFSK	9	0	994.497	yes	no	2		0.00045199	147.4	5020400
P07910	Heterogeneous nuclear ribonucleoproteins C1/C2	HNRNPC	GFAFVQYVNER	11	0	1328.65	yes	yes	2		6.4977e-10	217.02	5410400
P07910	Heterogeneous nuclear ribonucleoproteins C1/C2	HNRNPC	KSDVEAIFSK	10	1	1122.59	yes	no	2		0.001073	134.75	5035400
P07910	Heterogeneous nuclear ribonucleoproteins C1/C2	HNRNPC	LKGDDLQAIKK	11	2	1227.72	yes	yes	3		0.011196	111.86	964140
P07910	Heterogeneous nuclear ribonucleoproteins C1/C2	HNRNPC	MIAGQVLDINLAAEPK	16	0	1681.91	yes	yes	2	3	1.2926e-09	210.91	4579600
P07910	Heterogeneous nuclear ribonucleoproteins C1/C2	HNRNPC	VDSLLENLEK	10	0	1158.61	yes	no	2		4.4688e-05	149.94	3484400
P07910	Heterogeneous nuclear ribonucleoproteins C1/C2	HNRNPC	VFIGNLNTLVVK	12	0	1315.79	yes	no	2		2.6229e-08	198.97	18782000
P08754	Guanine nucleotide-binding protein G(k) subunit alpha	GNAI3	ISQSNYIPTQQDVLR	15	0	1760.91	yes	yes	2		0.0016967	121.45	851130
P08865	40S ribosomal protein SA	RPSA	FLAAGTHLGGTNLDFQMEQYIYK	23	0	2616.27	yes	yes	3		4.6619e-07	173.49	1579700		+
P08865	40S ribosomal protein SA	RPSA	AIVAIENPADVSVISSR	17	0	1739.94	yes	yes	2	3	7.9849e-08	205.66	9865300	+
P08865	40S ribosomal protein SA	RPSA	DPEEIEKEEQAAAEK	15	1	1714.79	yes	yes	2	3	1.4932e-06	213	13023000	+
P08865	40S ribosomal protein SA	RPSA	FTPGTFTNQIQAAFR	15	0	1697.85	yes	yes	2	3	1.8948e-07	196.5	13029000	+
P08865	40S ribosomal protein SA	RPSA	FAAATGATPIAGR	13	0	1202.64	yes	yes	2		1.685e-07	204.32	98530000
P08865	40S ribosomal protein SA	RPSA	SDGIYIINLK	10	0	1134.63	yes	yes	2		3.4003e-05	156.16	32735000
P08865	40S ribosomal protein SA	RPSA	SGALDVLQMKEEDVLK	16	1	1773.92	yes	yes	3		0.040729	57.034	1078500
P08865	40S ribosomal protein SA	RPSA	KSDGIYIINLK	11	1	1262.72	yes	yes	2	3	5.1255e-12	237.53	39311000
P08865	40S ribosomal protein SA	RPSA	LLVVTDPR	8	0	911.544	yes	yes	2		0.0072854	123.98	68195000
P17612	cAMP-dependent protein kinase catalytic subunit alpha	PRKACA	ILQAVNFPFLVK	12	0	1387.82	yes	yes	2		2.4034e-05	160.91	998720
P17612	cAMP-dependent protein kinase catalytic subunit alpha	PRKACA	NLLQVDLTK	9	0	1042.6	yes	no	2		0.029362	91.701	1702400
P19387	DNA-directed RNA polymerase II subunit RPB3	POLR2C	SEYSELDEDESQAPYDPNGKPER	23	1	2654.13	yes	yes	3		1.233e-05	151.95	1140200
P19387	DNA-directed RNA polymerase II subunit RPB3	POLR2C	FIIENTDLAVANSIR	15	0	1674.89	yes	yes	2		3.0715e-25	305.98	2181000
P19387	DNA-directed RNA polymerase II subunit RPB3	POLR2C	ITELTDENVK	10	0	1160.59	yes	yes	2		2.9143e-10	206.49	4082500
P19387	DNA-directed RNA polymerase II subunit RPB3	POLR2C	LGLIPLISDDIVDK	14	0	1509.87	yes	yes	2		0.0017656	120.87	3336400
P19387	DNA-directed RNA polymerase II subunit RPB3	POLR2C	LSDLQTQLSHEIQSDVLTIN	20	0	2253.15	yes	yes	2	3	0.032785	61.276	848720
P19387	DNA-directed RNA polymerase II subunit RPB3	POLR2C	WNPTAGVAFEYDPDNALR	18	0	2034.94	yes	yes	2		0.030023	66.536	846010
P19784	Casein kinase II subunit alpha	CSNK2A2	EAMEHPYFYPVVK	13	0	1608.76	yes	yes	2		0.00027939	144.7	8693000		+
P19784	Casein kinase II subunit alpha	CSNK2A2	LIDWGLAEFYHPAQEYNVR	19	0	2320.13	yes	yes	2	3	0.00069447	98.281	5366700	+
P19784	Casein kinase II subunit alpha	CSNK2A2	VYAEVNSLR	9	0	1049.55	yes	yes	2		3.3695e-10	212.03	55421000	+
P19784	Casein kinase II subunit alpha	CSNK2A2	YSEVFEAINITNNER	15	0	1797.85	yes	yes	2	3	7.6232e-25	299.56	29866000	+
P19784	Casein kinase II subunit alpha	CSNK2A2	EPFFHGQDNYDQLVR	15	0	1863.85	yes	yes	2	3	5.501e-05	162.88	39211000	+
P19784	Casein kinase II subunit alpha	CSNK2A2	REPFFHGQDNYDQLVR	16	1	2019.96	yes	yes	3	4	0.00041288	163.64	15574000	+
P19784	Casein kinase II subunit alpha	CSNK2A2	QLYQILTDFDIR	12	0	1523.8	yes	yes	2		2.7331e-08	193.15	946740	+
P19784	Casein kinase II subunit alpha	CSNK2A2	TPALVFEYINNTDFK	15	0	1770.88	yes	yes	2	3	1.8304e-47	367.69	20457000	+
P19784	Casein kinase II subunit alpha	CSNK2A2	DVKPHNVMIDHQQK	14	1	1687.85	yes	yes	3	4	0.001934	115.34	29303000
P19784	Casein kinase II subunit alpha	CSNK2A2	EYWDYEAHVPSWGNQDDYQLVR	22	0	2769.21	yes	yes	3		1.3537e-17	164.97	0
P19784	Casein kinase II subunit alpha	CSNK2A2	FYMYELLK	8	0	1105.55	yes	yes	2		0.00016576	153.71	76315000
P19784	Casein kinase II subunit alpha	CSNK2A2	HLVSPEALDLLDK	13	0	1448.79	yes	yes	3		4.7166e-08	205.12	12626000
P19784	Casein kinase II subunit alpha	CSNK2A2	KYHIDLDPHFNDILGQHSR	19	1	2304.14	yes	yes	4		0.011432	63.546	2934600
P19784	Casein kinase II subunit alpha	CSNK2A2	LIDTVKDPVSK	11	1	1213.69	yes	yes	2	3	3.5897e-05	188.27	62575000
P19784	Casein kinase II subunit alpha	CSNK2A2	VLGTEELYGYLK	12	0	1383.73	yes	yes	2		6.363e-12	236.22	84310000
P19784	Casein kinase II subunit alpha	CSNK2A2	WENFIHSENR	10	0	1330.61	yes	yes	3		0.04447	37.6	0
P19784	Casein kinase II subunit alpha	CSNK2A2	YHIDLDPHFNDILGQHSR	18	0	2176.05	yes	yes	3	4	0.0009745	97.823	44028000
P22087	rRNA 2-O-methyltransferase fibrillarin	FBL	NGGHFVISIK	10	0	1070.59	yes	yes	3		0.029444	72.848	0	+
P22087	rRNA 2-O-methyltransferase fibrillarin	FBL	LAAAILGGVDQIHIKPGAK	19	1	1871.1	yes	yes	3	4	0.00085462	114.64	42563000	+
P22087	rRNA 2-O-methyltransferase fibrillarin	FBL	DHAVVVGVYRPPPK	14	1	1532.85	yes	yes	2	3	1.8238e-05	163.45	17973000
P22087	rRNA 2-O-methyltransferase fibrillarin	FBL	IVALNAHTFLR	11	0	1253.72	no	no	2	3	6.8051e-07	185.99	29247000
P22087	rRNA 2-O-methyltransferase fibrillarin	FBL	NLVPGESVYGEK	12	0	1290.65	yes	yes	2		0.00091101	120.59	24447000
P22087	rRNA 2-O-methyltransferase fibrillarin	FBL	RVSISEGDDKIEYR	14	2	1665.83	yes	yes	3		0.012894	99.238	2222800
P22087	rRNA 2-O-methyltransferase fibrillarin	FBL	VSISEGDDKIEYR	13	1	1509.73	yes	yes	2		0.041468	65.956	4544100
P29372	DNA-3-methyladenine glycosylase	MPG	AFLGQVLVR	9	0	1001.6	yes	yes	2		0.014557	101.72	667920
P29372	DNA-3-methyladenine glycosylase	MPG	ALEPLEGLETMR	12	0	1357.69	yes	yes	2		0.0035437	109.16	424130
P29692	Elongation factor 1-delta	EEF1D	GVVQELQQAISK	12	0	1298.72	yes	yes	2		1.4468e-06	186.16	2851900
P29692	Elongation factor 1-delta	EEF1D	IASLEVENQSLR	12	0	1357.72	yes	yes	2		1.226e-15	256.95	3260800
P29692	Elongation factor 1-delta	EEF1D	SLAGSSGPGASSGTSGDHGELVVR	24	0	2184.04	yes	yes	3		0.0029138	80.733	2382800
P31689	DnaJ homolog subfamily A member 1	DNAJA1	NVVHQLSVTLEDLYNGATR	19	0	2128.09	yes	yes	3		0.001444	94.61	0	+
P31689	DnaJ homolog subfamily A member 1	DNAJA1	ITFHGEGDQEPGLEPGDIIIVLDQK	25	0	2719.37	yes	yes	3		7.4298e-06	115.54	826090
P31689	DnaJ homolog subfamily A member 1	DNAJA1	QISQAYEVLSDAK	13	0	1450.73	yes	yes	2		2.4302e-05	168.89	980190
P31689	DnaJ homolog subfamily A member 1	DNAJA1	TIVITSHPGQIVK	13	0	1391.81	yes	yes	2		0.00016136	158.25	3930400
P35249	Replication factor C subunit 4	RFC4	DLIDEGHAATQLVNQLHDVVVENNLSDK	28	0	3085.53	yes	yes	3	4	7.6891e-08	141.48	3891500	+
P35249	Replication factor C subunit 4	RFC4	IVILDEADSMTSAAQAALR	19	0	1974.01	yes	yes	2	3	2.9561e-24	292.2	8613000	+
P35249	Replication factor C subunit 4	RFC4	AITFLQSATR	10	0	1106.61	yes	yes	2		4.1377e-10	201.09	9253100
P35249	Replication factor C subunit 4	RFC4	ELFGPELFR	9	0	1106.58	yes	yes	2		0.00077034	140.11	9509000
P35249	Replication factor C subunit 4	RFC4	IIEPLTSR	8	0	927.539	yes	yes	2		0.019455	104.44	4249700
P35249	Replication factor C subunit 4	RFC4	ISDEGIAYLVK	11	0	1206.65	yes	yes	2		9.0768e-07	183.85	14946000
P35249	Replication factor C subunit 4	RFC4	KAITFLQSATR	11	1	1234.7	yes	yes	3		0.045647	46.069	626430
P35249	Replication factor C subunit 4	RFC4	SLEGADLPNLLFYGPPGTGK	20	0	2045.05	yes	yes	2		2.7154e-18	254.02	5929300
P35249	Replication factor C subunit 4	RFC4	TSTILAAAR	9	0	902.519	yes	yes	2		0.00027913	152.11	6673400
P35249	Replication factor C subunit 4	RFC4	VITDIAGVIPAEK	13	0	1324.76	yes	yes	2		0.00103	129.76	16386000
P35249	Replication factor C subunit 4	RFC4	VLELNASDER	10	0	1144.57	yes	yes	2		1.595e-07	187.42	15061000
P35250	Replication factor C subunit 2	RFC2	IAEGVNSLLQMAGLLAR	17	0	1754.97	yes	yes	2	3	3.6913e-05	183.73	4992700	+	+
P35250	Replication factor C subunit 2	RFC2	VPYTDDGLEAIIFTAQGDMR	20	0	2211.05	yes	yes	2	3	0.00015654	141.93	1004400		+
P35250	Replication factor C subunit 2	RFC2	LNEIVGNEDTVSR	13	0	1444.72	yes	yes	2		1.1308e-08	214.48	9366000	+
P35250	Replication factor C subunit 2	RFC2	IIILDEADSMTDGAQQALR	19	0	2059.03	yes	yes	2	3	1.8201e-38	336.71	8962700	+
P35250	Replication factor C subunit 2	RFC2	DAMLELNASNDR	12	0	1347.61	yes	yes	2		2.9079e-09	215.77	1911000
P35250	Replication factor C subunit 2	RFC2	EGNVPNIIIAGPPGTGK	17	0	1632.88	yes	yes	2		2.2773e-05	182.28	12063000
P35250	Replication factor C subunit 2	RFC2	IIEPIQSR	8	0	954.55	yes	yes	2		0.025651	100.02	7966000
P35250	Replication factor C subunit 2	RFC2	LTDAQILTR	9	0	1029.58	yes	yes	2		4.8622e-10	206.73	13391000
P35250	Replication factor C subunit 2	RFC2	TFQMAEYLK	9	0	1129.55	yes	yes	2		0.00014813	148.56	3212000
P36873	Serine/threonine-protein phosphatase PP1-gamma catalytic subunit	PPP1CC	AHQVVEDGYEFFAK	14	0	1638.77	no	no	2	3	1.6934e-05	167.73	2488300
P36873	Serine/threonine-protein phosphatase PP1-gamma catalytic subunit	PPP1CC	EIFLSQPILLELEAPLK	17	0	1952.12	no	no	2		0.0050541	94.639	419160
P36873	Serine/threonine-protein phosphatase PP1-gamma catalytic subunit	PPP1CC	IKYPENFFLLR	11	1	1438.8	no	no	3		0.00088698	129.88	1908700
P36873	Serine/threonine-protein phosphatase PP1-gamma catalytic subunit	PPP1CC	NVQLQENEIR	10	0	1241.64	yes	yes	2		3.0042e-07	175.49	1146400
P40937	Replication factor C subunit 5	RFC5	LVILDEADAMTQDAQNALR	19	0	2086.04	yes	yes	2	3	5.174e-31	316.58	11304000	+	+
P40937	Replication factor C subunit 5	RFC5	YRPQTLNDLISHQDILSTIQK	21	1	2482.32	yes	yes	3	4	5.3833e-08	202.61	18799000	+
P40937	Replication factor C subunit 5	RFC5	ALNILQSTNMAFGK	14	0	1506.79	yes	yes	2		5.2927e-19	267.77	5917300
P40937	Replication factor C subunit 5	RFC5	FGPLTPELMVPR	12	0	1355.73	yes	yes	2		0.00017376	140.63	4661000
P40937	Replication factor C subunit 5	RFC5	FINEDRLPHLLLYGPPGTGK	20	1	2236.2	yes	yes	4		0.01207	70.837	1676900
P40937	Replication factor C subunit 5	RFC5	GPILSFASTR	10	0	1047.57	yes	yes	2		0.00059064	138.22	12304000
P40937	Replication factor C subunit 5	RFC5	IQLSSLIAAFQVTR	14	0	1545.89	yes	yes	2	3	2.02e-05	178.47	4494500
P40937	Replication factor C subunit 5	RFC5	LEHVVEEEKVDISEDGMK	18	1	2084.99	yes	yes	3	4	0.00015138	160.43	6091400
P40937	Replication factor C subunit 5	RFC5	LPHLLLYGPPGTGK	14	0	1461.83	yes	yes	3		0.019607	70.54	5698300
P40938	Replication factor C subunit 3	RFC3	TVAQSQQLETNSQR	14	0	1588.78	yes	yes	2		1.0989e-14	255.72	5556000	+
P40938	Replication factor C subunit 3	RFC3	ETANAIVSQQTPQR	14	0	1541.78	yes	yes	2		7.9311e-15	258.39	2565100	+
P40938	Replication factor C subunit 3	RFC3	AIYHLEAFVAK	11	0	1260.69	yes	yes	2	3	0.0019211	109.83	12200000
P40938	Replication factor C subunit 3	RFC3	EGLNLPSQLAHR	12	0	1333.71	yes	yes	2		4.2157e-05	155.88	3441600
P40938	Replication factor C subunit 3	RFC3	GEVAQMAAYYEHR	13	0	1523.68	yes	yes	2	3	0.0079138	93.243	4644600
P40938	Replication factor C subunit 3	RFC3	IEISTIASNYHLEVNPSDAGNSDR	24	0	2601.23	yes	yes	3		2.8175e-08	165.41	3107100
P40938	Replication factor C subunit 3	RFC3	KIEISTIASNYHLEVNPSDAGNSDR	25	1	2729.33	yes	yes	3	4	3.1689e-07	154.87	5438300
P40938	Replication factor C subunit 3	RFC3	VVIQEMLK	8	0	958.552	yes	yes	2		0.018928	104.01	16798000
P40938	Replication factor C subunit 3	RFC3	VVLLTEVDK	9	0	1014.6	yes	yes	2		0.00021487	150.35	16523000
P40938	Replication factor C subunit 3	RFC3	VVLLTEVDKLTK	12	1	1356.82	yes	yes	2	3	1.9301e-08	234.24	10293000
P43307	Translocon-associated protein subunit alpha	SSR1	FLVGFTNK	8	0	924.507	yes	yes	2		0.024806	101.25	8126700
P43307	Translocon-associated protein subunit alpha	SSR1	GEDFPANNIVK	11	0	1202.59	yes	yes	2		0.001942	119.34	7854900
P43307	Translocon-associated protein subunit alpha	SSR1	GTEDFIVESLDASFR	15	0	1684.79	yes	yes	2		0.00023083	156.17	437250
P46777	60S ribosomal protein L5	RPL5	YLMEEDEDAYKK	12	1	1532.67	yes	yes	2	3	6.0346e-16	267.07	60854000		+
P46777	60S ribosomal protein L5	RPL5	HIMGQNVADYMR	12	0	1433.65	yes	yes	2	3	2.145e-11	222.2	52559000	+	+
P46777	60S ribosomal protein L5	RPL5	NSVTPDMMEEMYK	13	0	1573.65	yes	yes	2		5.0901e-11	231.69	18544000		+
P46777	60S ribosomal protein L5	RPL5	EFNAEVHR	8	0	1000.47	yes	yes	2		0.0012323	145.16	35377000
P46777	60S ribosomal protein L5	RPL5	FPGYDSESK	9	0	1028.45	yes	yes	2		0.00057785	144.77	13820000
P46777	60S ribosomal protein L5	RPL5	GAVDGGLSIPHSTK	14	0	1337.69	yes	yes	2		0.0050206	110.44	43790000
P46777	60S ribosomal protein L5	RPL5	NSVTPDMMEEMYKK	14	1	1701.74	yes	yes	2	3	0.00053218	145.52	9815900
P46777	60S ribosomal protein L5	RPL5	RFPGYDSESK	10	1	1184.55	yes	yes	2	3	0.00030797	150.15	7045900
P46777	60S ribosomal protein L5	RPL5	RLVIQDK	7	1	870.529	yes	yes	2		0.015158	101.33	0
P46777	60S ribosomal protein L5	RPL5	YLMEEDEDAYK	11	0	1404.58	yes	yes	2		6.4092e-12	224.58	3129500
P47755	F-actin-capping protein subunit alpha-2	CAPZA2	FIIHAPPGEFNEVFNDVR	18	0	2100.04	yes	yes	3		0.012907	66.022	666340
P48729	Casein kinase I isoform alpha	CSNK1A1	DIKPDNFLMGIGR	13	1	1474.76	yes	yes	3		0.0073647	100.02	1435400
P48729	Casein kinase I isoform alpha	CSNK1A1	FEEAPDYMYLR	11	0	1432.63	yes	yes	2		1.3595e-06	171.92	588740
P48729	Casein kinase I isoform alpha	CSNK1A1	HPQLLYESK	9	0	1113.58	yes	no	2		0.0017131	126.31	1885500
P48729	Casein kinase I isoform alpha	CSNK1A1	ILQGGVGIPHIR	12	0	1258.75	yes	yes	3		0.017444	76.332	3264200
P48729	Casein kinase I isoform alpha	CSNK1A1	TSLPWQGLK	9	0	1028.57	yes	yes	2		0.026723	93.649	904240
P48729	Casein kinase I isoform alpha	CSNK1A1	TVLMLADQMISR	12	0	1376.72	yes	no	2		4.3417e-09	213.99	2219800
P49770	Translation initiation factor eIF-2B subunit beta	EIF2B2	AVTGTHTLALAAK	13	0	1252.71	yes	yes	2		0.0069273	103.14	1864800
P49770	Translation initiation factor eIF-2B subunit beta	EIF2B2	FVAPEEVLPFTEGDILEK	18	0	2032.04	yes	yes	2	3	1.5278e-07	194.77	6729200
P49770	Translation initiation factor eIF-2B subunit beta	EIF2B2	IESFVETLK	9	0	1064.58	yes	yes	2		0.011698	102.06	1909700
P49770	Translation initiation factor eIF-2B subunit beta	EIF2B2	IESFVETLKR	10	1	1220.68	yes	yes	3		0.014763	77.533	0
P49770	Translation initiation factor eIF-2B subunit beta	EIF2B2	LSPQFPNEEDSFHK	14	0	1673.77	yes	yes	2		0.016312	82.925	1136700
P49770	Translation initiation factor eIF-2B subunit beta	EIF2B2	MTAAQPSETTVGNMVR	16	0	1691.8	yes	yes	2		2.4574e-09	163.44	0
P49770	Translation initiation factor eIF-2B subunit beta	EIF2B2	WSNAGELMELIR	12	0	1417.7	yes	yes	2		4.7498e-05	152	1694600
P50750	Cyclin-dependent kinase 9	CDK9	AANVLITR	8	0	856.513	yes	yes	2		0.039979	93.649	1029800
P50750	Cyclin-dependent kinase 9	CDK9	DPYALDLIDK	10	0	1161.59	yes	yes	2		0.00097925	126.03	1490700
P50750	Cyclin-dependent kinase 9	CDK9	LADFGLAR	8	0	861.471	yes	no	2		0.014357	113.26	4161000
P50750	Cyclin-dependent kinase 9	CDK9	LLVLDPAQR	9	0	1023.61	yes	yes	2		0.044946	82.645	1752800
P50750	Cyclin-dependent kinase 9	CDK9	NPATTNQTEFER	12	0	1406.64	yes	yes	2		2.7647e-08	195.72	834590
P52907	F-actin-capping protein subunit alpha-1	CAPZA1	EASDPQPEEADGGLK	15	0	1541.68	yes	yes	2		0.0027929	113.65	304060
P52907	F-actin-capping protein subunit alpha-1	CAPZA1	FTITPPTAQVVGVLK	15	0	1569.91	yes	yes	2		0.0023547	115.12	813740
P52907	F-actin-capping protein subunit alpha-1	CAPZA1	LLLNNDNLLR	10	0	1196.69	no	no	2		3.1868e-07	175.33	2924300
P61160	Actin-related protein 2	ACTR2	DLMVGDEASELR	12	0	1333.62	yes	yes	2		3.4929e-06	173.19	1452600
P61160	Actin-related protein 2	ACTR2	GYAFNHSADFETVR	14	0	1612.73	yes	yes	2	3	0.0012918	110.92	4398400
P61964	WD repeat-containing protein 5	WDR5	FSPNGEWLASSSADK	15	0	1594.73	yes	yes	2		0.00010657	161.94	1618700
P61964	WD repeat-containing protein 5	WDR5	TLIDDDNPPVSFVK	14	0	1558.79	yes	yes	2		0.0012494	128.73	5527700
P61964	WD repeat-containing protein 5	WDR5	TLPAHSDPVSAVHFNR	16	0	1746.88	yes	yes	3		7.4351e-06	120.29	0
P61964	WD repeat-containing protein 5	WDR5	YILAATLDNTLK	12	0	1334.74	yes	yes	2		3.0311e-15	242.97	10764000
P62136	Serine/threonine-protein phosphatase PP1-alpha catalytic subunit	PPP1CA	LNLDSIIGR	9	0	999.571	yes	yes	2		0.011072	105.17	649590
P68133	Actin, alpha skeletal muscle	ACTA1	YPIEHGIITNWDDMEK	16	0	1959.9	yes	no	3		0.00025821	143.58	3578300		+
P78345	Ribonuclease P protein subunit p38	RPP38	ELLDTSFEDLSKPK	14	1	1620.82	yes	yes	2		0.016512	121.45	507310
P78345	Ribonuclease P protein subunit p38	RPP38	IEDSGENLETEPLESQDR	18	0	2059.92	yes	yes	2		1.104e-13	237.81	1206300
P78345	Ribonuclease P protein subunit p38	RPP38	NTTDFVDEVR	10	0	1194.55	yes	yes	2		0.0051804	108.98	2014200
P78345	Ribonuclease P protein subunit p38	RPP38	TSLNNPYIIR	10	0	1189.65	yes	yes	2		4.5904e-05	148.56	1642300
P78406	mRNA export factor	RAE1	SNGTNTSAPQDIYAVNGIAFHPVHGTLATVGSDGR	35	0	3523.71	yes	yes	4		0.03917	48.533	0	+
P78406	mRNA export factor	RAE1	GLIVYQLENQPSEFR	15	0	1791.92	yes	yes	2		5.9129e-10	214.89	3680100
P78406	mRNA export factor	RAE1	MWDLSSNQAIQIAQHDAPVK	20	0	2251.11	yes	yes	3		0.010221	66.068	1752200
P78406	mRNA export factor	RAE1	NAAEELKPR	9	1	1026.55	yes	yes	2		0.0091017	145.25	5271100
P78406	mRNA export factor	RAE1	VAIHYINPPNPAK	13	0	1432.78	yes	yes	3		0.010781	83.081	5296100
P82650	28S ribosomal protein S22, mitochondrial	MRPS22	LMTQAQLEEATR	12	0	1389.69	yes	yes	2		5.5733e-26	297.5	11419000	+	+
P82650	28S ribosomal protein S22, mitochondrial	MRPS22	KIDGLLIDQIQR	12	1	1410.82	yes	yes	2	3	9.1677e-07	195.71	8700800	+
P82650	28S ribosomal protein S22, mitochondrial	MRPS22	DLIDDATNLVQLYHVLHPDGQSAQGAK	27	0	2917.46	yes	yes	3		0.00014012	88.684	982840
P82650	28S ribosomal protein S22, mitochondrial	MRPS22	DQAAEGINLIK	11	0	1170.62	yes	yes	2		1.0763e-08	199.12	12874000
P82650	28S ribosomal protein S22, mitochondrial	MRPS22	IDGLLIDQIQR	11	0	1282.72	yes	yes	2		1.5953e-06	172.13	5354200
P82650	28S ribosomal protein S22, mitochondrial	MRPS22	ILTPIIFKEENLR	13	1	1584.92	yes	yes	3		0.03525	63.966	2511500
P82650	28S ribosomal protein S22, mitochondrial	MRPS22	KILTPIIFKEENLR	14	2	1713.02	yes	yes	3		0.0071796	111.81	1695100
P82650	28S ribosomal protein S22, mitochondrial	MRPS22	KPTFMDEEVQSILTK	15	1	1764.9	yes	yes	2	3	3.6132e-05	178.22	13984000
P82650	28S ribosomal protein S22, mitochondrial	MRPS22	MIQVYFPK	8	0	1024.54	yes	yes	2		0.0083908	119.41	4059400
P82650	28S ribosomal protein S22, mitochondrial	MRPS22	MTGLNLQK	8	0	903.485	yes	yes	2		0.025063	101.6	6347800
P82650	28S ribosomal protein S22, mitochondrial	MRPS22	TFKPAIQELKPPTYK	15	2	1759.99	yes	yes	4		0.025099	76.311	10697000
P82650	28S ribosomal protein S22, mitochondrial	MRPS22	VPINDVLAEDK	11	0	1211.64	yes	yes	2		0.00634	103.14	19454000
P82650	28S ribosomal protein S22, mitochondrial	MRPS22	VPINDVLAEDKILEGTETTK	20	1	2184.15	yes	yes	3		0.0001116	147.84	7150900
P82650	28S ribosomal protein S22, mitochondrial	MRPS22	YVFTDISYSIPHR	13	0	1596.79	yes	yes	2	3	0.00012531	155.88	11243000
Q01105	Protein SET	SET	LNEQASEEILK	11	0	1272.66	yes	yes	2		0.0016798	118.61	1125400
Q01105	Protein SET	SET	VEVTEFEDIK	10	0	1207.6	yes	no	2		2.2371e-07	181.53	1553800
Q02878	60S ribosomal protein L6	RPL6	SVFALTNGIYPHK	13	0	1445.77	yes	yes	2	3	2.6194e-14	265.75	1232300	+
Q02878	60S ribosomal protein L6	RPL6	HQEGEIFDTEK	11	0	1331.6	yes	yes	2		2.0235e-09	214	5477500	+
Q02878	60S ribosomal protein L6	RPL6	QLASGLLLVTGPLVLNR	17	0	1763.07	yes	yes	2	3	0.0021399	122.01	604480	+
Q02878	60S ribosomal protein L6	RPL6	AIPQLQGYLR	10	0	1157.66	yes	yes	2		0.02377	89.08	22089000
Q02878	60S ribosomal protein L6	RPL6	AVDSQILPK	9	0	969.549	yes	yes	2		0.015911	101.66	5312100
Q02878	60S ribosomal protein L6	RPL6	HLTDAYFK	8	0	993.492	yes	yes	2		0.035409	93.143	19650000
Q02878	60S ribosomal protein L6	RPL6	HQEGEIFDTEKEK	13	1	1588.74	yes	yes	3		0.0015799	119.17	6854500
Q02878	60S ribosomal protein L6	RPL6	HQEGEIFDTEKEKYEITEQR	20	2	2508.18	yes	yes	4		0.0012474	102.98	3309400
Q02878	60S ribosomal protein L6	RPL6	VLATVTKPVGGDK	13	1	1283.74	yes	yes	2		0.0032976	147.33	580410
Q02878	60S ribosomal protein L6	RPL6	YYPTEDVPR	9	0	1138.53	yes	yes	2		0.0057668	114.89	15514000
Q07021	Complement component 1 Q subcomponent-binding protein, mitochondrial	C1QBP	AFVDFLSDEIKEER	14	1	1696.83	yes	yes	3		0.0010814	126.09	2991200
Q07021	Complement component 1 Q subcomponent-binding protein, mitochondrial	C1QBP	VEEQEPELTSTPNFVVEVIK	20	0	2286.16	yes	yes	2	3	1.6378e-06	170.38	1984400
Q13243	Serine/arginine-rich splicing factor 5	SRSF5	GFGFVEFEDPR	11	0	1298.59	yes	yes	2		0.023467	92.866	459920
Q13243	Serine/arginine-rich splicing factor 5	SRSF5	LNEGVVEFASYGDLK	15	0	1639.81	yes	yes	2		6.2401e-07	191.15	1435800
Q13347	Eukaryotic translation initiation factor 3 subunit I	EIF3I	LFDSTTLEHQK	11	0	1317.66	yes	yes	2	3	1.0653e-08	195.83	15946000	+
Q13347	Eukaryotic translation initiation factor 3 subunit I	EIF3I	DMTMFVTASK	10	0	1129.51	yes	yes	2		2.8694e-05	159.09	5301400
Q13347	Eukaryotic translation initiation factor 3 subunit I	EIF3I	DPIVNVWYSVNGER	14	0	1646.81	yes	yes	2		0.00068072	136.57	744570
Q13347	Eukaryotic translation initiation factor 3 subunit I	EIF3I	DPSQIDNNEPYMK	13	0	1549.67	yes	yes	2		8.4705e-11	228.7	4388600
Q13347	Eukaryotic translation initiation factor 3 subunit I	EIF3I	EGDLLFTVAK	10	0	1091.59	yes	yes	2		0.00033012	143.5	18569000
Q13347	Eukaryotic translation initiation factor 3 subunit I	EIF3I	SGEVLVNVK	9	0	943.534	yes	yes	2		4.5466e-07	185.81	12694000
Q13347	Eukaryotic translation initiation factor 3 subunit I	EIF3I	GHFGPINSVAFHPDGK	16	0	1678.82	yes	yes	3	4	0.0010328	118.52	33075000
Q13347	Eukaryotic translation initiation factor 3 subunit I	EIF3I	MKPILLQGHER	11	1	1320.73	yes	yes	3		0.023309	80.834	8114200
Q13347	Eukaryotic translation initiation factor 3 subunit I	EIF3I	QINDIQLSR	9	0	1085.58	yes	yes	2		0.020348	96.171	1365500
Q13347	Eukaryotic translation initiation factor 3 subunit I	EIF3I	SYSSGGEDGYVR	12	0	1275.54	yes	yes	2		0.0010183	120.55	6020500
Q13347	Eukaryotic translation initiation factor 3 subunit I	EIF3I	TERPVNSAALSPNYDHVVLGGGQEAMDVTTTSTR	34	1	3572.72	yes	yes	3	4	0.00012272	103.93	8200000
Q15024	Exosome complex component RRP42	EXOSC7	GSLDPESIFEMMETGK	16	0	1769.79	yes	yes	2		7.6137e-06	179.55	1875700		+
Q15024	Exosome complex component RRP42	EXOSC7	VYIVHGVQEDLR	12	0	1426.76	yes	yes	2	3	2.5755e-08	196.67	32278000	+
Q15024	Exosome complex component RRP42	EXOSC7	GGDDLGTEIANTLYR	15	0	1593.76	yes	yes	2	3	1.097e-18	268.9	22513000
Q15024	Exosome complex component RRP42	EXOSC7	LGHTDILVGVK	11	0	1150.67	yes	yes	2	3	0.00047691	136.49	21270000
Q15365	Poly(rC)-binding protein 1	PCBP1	ESTGAQVQVAGDMLPNSTER	20	0	2088.97	no	no	2	3	1.5516e-07	209.23	2853800	+	+
Q15365	Poly(rC)-binding protein 1	PCBP1	AFAMIIDK	8	0	907.484	no	no	2		0.0388	93.143	1606300
Q15365	Poly(rC)-binding protein 1	PCBP1	IITLTGPTNAIFK	13	0	1387.81	yes	yes	2	3	1.0144e-10	230.81	51728000
Q15365	Poly(rC)-binding protein 1	PCBP1	LEEDINSSMTNSTAASRPPVTLR	23	1	2488.22	yes	yes	3		0.00049683	109.22	2408500
Q15366	Poly(rC)-binding protein 2	PCBP2	IANPVEGSTDR	11	0	1157.57	yes	yes	2		0.022785	89.356	1340500
Q15366	Poly(rC)-binding protein 2	PCBP2	IITLAGPTNAIFK	13	0	1357.8	yes	yes	2		1.4956e-05	179.67	8697800
Q15629	Translocating chain-associated membrane protein 1	TRAM1	EHSAFQAPAVK	11	0	1183.6	yes	yes	2	3	0.0034272	99.788	2316700
Q15629	Translocating chain-associated membrane protein 1	TRAM1	FINFQLR	7	0	936.518	yes	yes	2		0.005595	135.87	4751800
Q15629	Translocating chain-associated membrane protein 1	TRAM1	LDFSTGNFNVLAVR	14	0	1551.8	yes	yes	2		0.00031644	153	2836900
Q16637	Survival motor neuron protein	SMN1	GTGQSDDSDIWDDTALIK	18	0	1935.87	yes	yes	2		3.5284e-07	196.65	1100500
Q16637	Survival motor neuron protein	SMN1	SAPWNSFLPPPPPMPGPR	18	0	1943.97	yes	yes	2		0.022066	72.932	1313100
Q16795	NADH dehydrogenase [ubiquinone] 1 alpha subcomplex subunit 9, mitochondrial	NDUFA9	FGPIPLGSLGWK	12	0	1270.71	yes	yes	2		0.033487	79.07	373000
Q16795	NADH dehydrogenase [ubiquinone] 1 alpha subcomplex subunit 9, mitochondrial	NDUFA9	IPQAIAQLSK	10	0	1067.63	yes	yes	2		0.0031025	119.27	1218100
Q16795	NADH dehydrogenase [ubiquinone] 1 alpha subcomplex subunit 9, mitochondrial	NDUFA9	LPHLPGLEDLGIQATPLELK	20	0	2153.21	yes	yes	3		0.00036021	109.67	913130
Q16795	NADH dehydrogenase [ubiquinone] 1 alpha subcomplex subunit 9, mitochondrial	NDUFA9	NFDFEDVFVK	10	0	1258.59	yes	yes	2		8.4217e-06	166.69	769060
Q16795	NADH dehydrogenase [ubiquinone] 1 alpha subcomplex subunit 9, mitochondrial	NDUFA9	VFEISPFEPWITR	13	0	1619.83	yes	yes	2		0.0059476	97.69	260260
Q16795	NADH dehydrogenase [ubiquinone] 1 alpha subcomplex subunit 9, mitochondrial	NDUFA9	VVQHSNVVINLIGR	14	0	1546.89	yes	yes	3		0.00026046	142.97	918360
Q3ZCQ8	Mitochondrial import inner membrane translocase subunit TIM50	TIMM50	TIALNGVEDVR	11	0	1185.64	yes	yes	2		0.0001545	145.14	2463400	+
Q3ZCQ8	Mitochondrial import inner membrane translocase subunit TIM50	TIMM50	IPDEFDNDPILVQQLR	16	0	1910.97	yes	yes	2		2.9066e-10	223.68	2156700
Q3ZCQ8	Mitochondrial import inner membrane translocase subunit TIM50	TIMM50	TVLEHYALEDDPLAAFK	17	0	1930.97	yes	yes	2	3	4.3039e-05	161.04	4962100
Q3ZCQ8	Mitochondrial import inner membrane translocase subunit TIM50	TIMM50	VLLDLSAFLK	10	0	1117.67	yes	yes	2		0.0021189	121.5	854860
Q5HYJ3	Protein FAM76B	FAM76B	ADFQYQESNLR	11	0	1369.63	yes	yes	2		8.6056e-09	198.97	6035900	+
Q5HYJ3	Protein FAM76B	FAM76B	ETVEQLQAK	9	0	1044.55	yes	yes	2		0.00047273	145.9	749520
Q6NZI2	Polymerase I and transcript release factor	PTRF	SDQVNGVLVLSLLDK	15	0	1598.89	yes	yes	2		0.00023459	175.26	1034300	+
Q6NZI2	Polymerase I and transcript release factor	PTRF	IIGAVDQIQLTQAQLEER	18	0	2024.09	yes	yes	2	3	3.6362e-07	185.63	4045100
Q6NZI2	Polymerase I and transcript release factor	PTRF	KLEVNEAELLR	11	1	1312.74	yes	yes	2	3	0.00012825	145.81	10320000
Q6P1K8	General transcription factor IIH subunit 2-like protein	GTF2H2C	ATIEDILFK	9	0	1048.58	yes	no	2		0.0050935	118.71	8990800
Q6P1K8	General transcription factor IIH subunit 2-like protein	GTF2H2C	ETGGTYHVILDESHYK	16	0	1847.87	yes	no	3		0.0068315	79.337	4805100
Q6P1K8	General transcription factor IIH subunit 2-like protein	GTF2H2C	HLYVVVDGSR	10	0	1143.6	yes	no	2		0.0087739	99.568	2020100
Q6P1K8	General transcription factor IIH subunit 2-like protein	GTF2H2C	LTELSGNPR	9	0	985.519	yes	no	2		0.0065989	116.52	1656600
Q6P1K8	General transcription factor IIH subunit 2-like protein	GTF2H2C	VSVIGLSAEVR	11	0	1128.65	yes	no	2		0.024048	89.189	2831200
Q7L2H7	Eukaryotic translation initiation factor 3 subunit M	EIF3M	DFIDSLGLLHEQNMAK	16	0	1829.9	yes	yes	2	3	3.7013e-24	288.06	11232000		+
Q7L2H7	Eukaryotic translation initiation factor 3 subunit M	EIF3M	LQLLSNLFHGMDK	13	0	1514.79	yes	yes	2	3	1.633e-06	188.09	34534000	+	+
Q7L2H7	Eukaryotic translation initiation factor 3 subunit M	EIF3M	LLTFMGMAVENK	12	0	1352.68	yes	yes	2		1.8867e-15	251.75	12039000		+
Q7L2H7	Eukaryotic translation initiation factor 3 subunit M	EIF3M	ALKDPNAFLFDHLLTLKPVK	20	2	2279.3	yes	yes	4		0.00062658	120.82	11363000
Q7L2H7	Eukaryotic translation initiation factor 3 subunit M	EIF3M	DPNAFLFDHLLTLKPVK	17	1	1967.09	yes	yes	3		0.00055225	137.91	14084000
Q7L2H7	Eukaryotic translation initiation factor 3 subunit M	EIF3M	FYQNNKDFIDSLGLLHEQNMAK	22	1	2624.27	yes	yes	4		0.0010609	91.622	2692000
Q7L2H7	Eukaryotic translation initiation factor 3 subunit M	EIF3M	VMVELLGSYTEDNASQAR	18	0	1981.94	yes	yes	2		2.33e-18	260.25	1658100
Q7L2H7	Eukaryotic translation initiation factor 3 subunit M	EIF3M	WISDWNLTTEK	11	0	1391.67	yes	yes	2		0.0028426	111.52	1373400
Q86UT8	Coiled-coil domain-containing protein 84	CCDC84	FLVTPQDYAR	10	0	1208.62	yes	yes	2		0.0074088	100.88	1387100
Q86UT8	Coiled-coil domain-containing protein 84	CCDC84	GLDSYEEKEDK	11	1	1311.58	yes	yes	2		0.024996	116.74	438850
Q86UT8	Coiled-coil domain-containing protein 84	CCDC84	LLPQVEAAR	9	0	995.576	yes	yes	2		0.023078	96.665	1933800
Q86UT8	Coiled-coil domain-containing protein 84	CCDC84	SVLEPQAVPDPEEGSSAPR	19	0	1963.95	yes	yes	2		0.00051878	138.28	1092700
Q86W42	THO complex subunit 6 homolog	THOC6	TSLEVPEINALLLVPK	16	0	1735.01	yes	yes	2	3	0.00030105	146.84	1514200	+
Q86W42	THO complex subunit 6 homolog	THOC6	AVPLAVPLGQTEVFQALQR	19	0	2036.14	yes	yes	2	3	7.7384e-05	171.04	18979000	+
Q86W42	THO complex subunit 6 homolog	THOC6	ERSPEVLSGGEDGAVR	16	1	1656.81	yes	yes	3		0.00058781	139.21	3860000
Q86W42	THO complex subunit 6 homolog	THOC6	EVQTIEVYK	9	0	1107.58	yes	yes	2		0.0014783	129.85	9161400
Q86W42	THO complex subunit 6 homolog	THOC6	HLLSAGDGEVK	11	0	1124.58	yes	yes	2		0.0072142	102.05	10251000
Q86W42	THO complex subunit 6 homolog	THOC6	HVTFYQDLILSAGQGR	16	0	1803.93	yes	yes	3		0.0042481	83.823	846670
Q86W42	THO complex subunit 6 homolog	THOC6	KPVVTFQAHDGPVYSMVSTDR	21	1	2333.15	yes	yes	3		8.0675e-06	157.88	2611300
Q86W42	THO complex subunit 6 homolog	THOC6	SPEVLSGGEDGAVR	14	0	1371.66	yes	yes	2		2.5793e-11	240.42	24386000
Q86W42	THO complex subunit 6 homolog	THOC6	SSTPTTIFPIR	11	0	1218.66	yes	yes	2		0.015867	111.06	19479000
Q86W42	THO complex subunit 6 homolog	THOC6	VDVFTNLGYR	10	0	1182.6	yes	yes	2		1.4058e-17	247.22	16259000
Q8IV48	3-5 exoribonuclease 1	ERI1	ADTFPQVLK	9	0	1017.55	yes	yes	2		0.03165	90.906	3166700
Q8IV48	3-5 exoribonuclease 1	ERI1	FITSSASDFSDPVYK	15	0	1662.78	yes	yes	2		0.0025377	111.64	1417200
Q8N0S6	Centromere protein L	CENPL	DPEAFLVQIVSK	12	0	1344.73	yes	yes	2		0.00030838	136.24	481600
Q8N0S6	Centromere protein L	CENPL	LLNAFIVAEK	10	0	1116.65	yes	yes	2		0.0080968	100.69	518560
Q8NET6	Carbohydrate sulfotransferase 13	CHST13	AYLAFLFVR	9	0	1098.62	yes	yes	2		0.020265	95.909	124120
Q8NET6	Carbohydrate sulfotransferase 13	CHST13	FAEFLAYLLDPR	12	0	1453.76	yes	yes	2		0.039611	69.846	194110
Q8NET6	Carbohydrate sulfotransferase 13	CHST13	LYDLDQDPR	9	0	1133.54	yes	yes	2		0.0040577	119.22	4018500
Q8TDN6	Ribosome biogenesis protein BRX1 homolog	BRIX1	ELLIQIFSTPR	11	0	1315.75	yes	yes	2		0.0095561	110.98	0	+
Q8TDN6	Ribosome biogenesis protein BRX1 homolog	BRIX1	SQPFVDHVFTFTILDNR	17	0	2035.02	yes	yes	2	3	0.00014398	148.7	14161000	+
Q8TDN6	Ribosome biogenesis protein BRX1 homolog	BRIX1	FLVQNIHTLAELK	13	0	1524.87	yes	yes	2	3	2.9967e-25	301.35	133440000	+
Q8TDN6	Ribosome biogenesis protein BRX1 homolog	BRIX1	FVLNLIK	7	0	845.537	yes	yes	1	2	0.00059414	155.73	109560000
Q8TDN6	Ribosome biogenesis protein BRX1 homolog	BRIX1	GGFAVQAK	8	0	776.418	yes	yes	2		0.020227	107.59	10367000
Q8TDN6	Ribosome biogenesis protein BRX1 homolog	BRIX1	GSRPLLSFDPAFDELPHYALLK	22	1	2485.3	yes	yes	3	4	1.4291e-08	208.87	5720400
Q8TDN6	Ribosome biogenesis protein BRX1 homolog	BRIX1	HATAEEVEEEER	12	0	1427.62	yes	yes	2	3	1.6632e-15	251.75	34819000
Q8TDN6	Ribosome biogenesis protein BRX1 homolog	BRIX1	HATAEEVEEEERDR	14	1	1698.74	yes	yes	2	3	1.3502e-07	228.7	23017000
Q8TDN6	Ribosome biogenesis protein BRX1 homolog	BRIX1	HLMQDLR	7	0	911.465	yes	yes	2		0.0064055	133.6	31339000
Q8TDN6	Ribosome biogenesis protein BRX1 homolog	BRIX1	IFQGSFGGPTLYENPHYQSPNMHR	24	0	2776.28	yes	yes	3	4	2.8507e-08	160.95	16220000
Q8TDN6	Ribosome biogenesis protein BRX1 homolog	BRIX1	ILIFSSR	7	0	834.496	yes	yes	2		0.044468	96.19	97350000
Q8TDN6	Ribosome biogenesis protein BRX1 homolog	BRIX1	KQDLYMWLSNSPHGPSAK	18	1	2058	yes	yes	3		2.6501e-07	189.77	4551900
Q8TDN6	Ribosome biogenesis protein BRX1 homolog	BRIX1	NEIDAEPPAKR	11	1	1238.63	yes	yes	3		0.029122	65.241	12409000
Q8TDN6	Ribosome biogenesis protein BRX1 homolog	BRIX1	PIEIQWVKPEPK	12	1	1462.82	yes	yes	3		0.019416	77.776	0
Q8TDN6	Ribosome biogenesis protein BRX1 homolog	BRIX1	PLLSFDPAFDELPHYALLK	19	0	2185.15	yes	yes	2	3	0.00011717	147.17	1253400
Q8TDN6	Ribosome biogenesis protein BRX1 homolog	BRIX1	RNEIDAEPPAK	11	1	1238.63	yes	yes	2	3	6.1722e-05	157.03	32917000
Q8TDN6	Ribosome biogenesis protein BRX1 homolog	BRIX1	RNEIDAEPPAKR	12	2	1394.73	yes	yes	2		0.035214	82.202	3321700
Q8TDN6	Ribosome biogenesis protein BRX1 homolog	BRIX1	TLLPHDPTADVFVTPAEEK	19	0	2079.05	yes	yes	3		0.00061011	109.67	1332400
Q8TDN6	Ribosome biogenesis protein BRX1 homolog	BRIX1	TLLPHDPTADVFVTPAEEKPIEIQWVKPEPK	31	2	3523.86	yes	yes	4		0.01674	67.368	19874000
Q8WVM0	Dimethyladenosine transferase 1, mitochondrial	TFB1M	VVQNVFQFR	9	0	1135.61	yes	yes	2		3.7819e-10	208.37	15699000	+
Q8WVM0	Dimethyladenosine transferase 1, mitochondrial	TFB1M	AGNLTNAYVYEVGPGPGGITR	21	0	2105.05	yes	yes	2	3	1.7649e-07	191.44	5055700
Q8WVM0	Dimethyladenosine transferase 1, mitochondrial	TFB1M	DGPFVYGR	8	0	909.434	yes	yes	2		0.011512	116.9	4030400
Q8WVM0	Dimethyladenosine transferase 1, mitochondrial	TFB1M	SILNADVAELLVVEK	15	0	1611.91	yes	yes	2		5.2732e-09	211.45	3347400
Q8WVM0	Dimethyladenosine transferase 1, mitochondrial	TFB1M	IVHGDVLTFK	10	0	1127.63	yes	yes	2	3	0.00019243	145.99	179160000
Q8WVM0	Dimethyladenosine transferase 1, mitochondrial	TFB1M	KAGNLTNAYVYEVGPGPGGITR	22	1	2233.15	yes	yes	3		0.00014533	111.45	3967100
Q8WVM0	Dimethyladenosine transferase 1, mitochondrial	TFB1M	LLELADIDPTLRPR	14	1	1620.92	yes	yes	2	3	0.00041352	179.83	51512000
Q8WVM0	Dimethyladenosine transferase 1, mitochondrial	TFB1M	NEEKEEDDAENYRL	14	2	1752.74	yes	yes	2	3	1.163e-19	300.49	3857700
Q8WVM0	Dimethyladenosine transferase 1, mitochondrial	TFB1M	QLSQNFLLDLR	11	0	1345.74	yes	yes	2		0.00085944	120.55	924780
Q8WVM0	Dimethyladenosine transferase 1, mitochondrial	TFB1M	TQMTLTFQK	9	0	1096.56	yes	yes	2		6.035e-07	176.48	7760800
Q92785	Zinc finger protein ubi-d4	DPF2	EGLISQDGSSLEALLR	16	0	1686.88	yes	yes	2	3	2.5808e-18	260.08	24061000	+
Q92785	Zinc finger protein ubi-d4	DPF2	GPGLASGQLYSYPAR	15	0	1535.77	yes	yes	2		4.4565e-05	174.24	4566000
Q92785	Zinc finger protein ubi-d4	DPF2	KLDASILEDR	10	1	1158.62	yes	yes	2	3	0.03135	87.216	3198200
Q92785	Zinc finger protein ubi-d4	DPF2	LDASILEDR	9	0	1030.53	yes	yes	2		5.8675e-05	159.34	8850400
Q92785	Zinc finger protein ubi-d4	DPF2	LLGEQYYK	8	0	1012.52	yes	yes	2		0.0017	141.52	42212000
Q92785	Zinc finger protein ubi-d4	DPF2	VDDDSLGEFPVTNSR	15	0	1649.75	yes	yes	2		6.5078e-05	164.66	21810000
Q969G5	Protein kinase C delta-binding protein	PRKCDBP	IQSGLGALSR	10	0	1000.57	yes	yes	2		2.3114e-07	185.99	20166000	+
Q969G5	Protein kinase C delta-binding protein	PRKCDBP	SHDTTSNTLAQLLAK	15	0	1598.83	yes	yes	2	3	5.1774e-14	249.58	21570000	+
Q969G5	Protein kinase C delta-binding protein	PRKCDBP	EEGEVPASAFQK	12	0	1290.61	yes	yes	2		1.8932e-08	205.07	5033100
Q969G5	Protein kinase C delta-binding protein	PRKCDBP	KGPAAPPPTPVKPPR	15	2	1508.88	yes	yes	3		0.00018314	184.11	31087000
Q969G5	Protein kinase C delta-binding protein	PRKCDBP	LASMLETLR	9	0	1032.56	yes	yes	2		8.3045e-05	152.11	17309000
Q969G5	Protein kinase C delta-binding protein	PRKCDBP	LEANHGLLVAR	11	0	1191.67	yes	yes	2	3	2.5226e-05	161.19	34051000
Q969G5	Protein kinase C delta-binding protein	PRKCDBP	LHVLLFK	7	0	868.553	yes	yes	2		0.034105	102.98	7048600
Q969G5	Protein kinase C delta-binding protein	PRKCDBP	LHVLLFKEEGEVPASAFQK	19	1	2141.15	yes	yes	3	4	0.00042037	122.16	2887300
Q969G5	Protein kinase C delta-binding protein	PRKCDBP	RIQSGLGALSR	11	1	1156.67	yes	yes	2		0.028479	89.44	1013600
Q96AG4	Leucine-rich repeat-containing protein 59	LRRC59	LQQLPADFGR	10	0	1143.6	yes	yes	2		0.00023575	144.55	101620000	+
Q96AG4	Leucine-rich repeat-containing protein 59	LRRC59	LVTLPVSFAQLK	12	0	1314.79	yes	yes	2	3	1.4837e-07	192.44	152410000	+
Q96AG4	Leucine-rich repeat-containing protein 59	LRRC59	DKLDGNELDLSLSDLNEVPVK	21	1	2312.17	yes	yes	2	3	2.7219e-13	247.58	127930000	+
Q96AG4	Leucine-rich repeat-containing protein 59	LRRC59	LVNLQHLDLLNNK	13	0	1532.87	yes	yes	2	3	1.8359e-07	194.86	126470000	+
Q96AG4	Leucine-rich repeat-containing protein 59	LRRC59	DNPLDPVLAK	10	0	1080.58	yes	yes	2		0.00035182	143.24	43310000
Q96AG4	Leucine-rich repeat-containing protein 59	LRRC59	HEILQWVLQTDSQQ	14	0	1723.85	yes	yes	2		4.5748e-15	255.72	2544900
Q96AG4	Leucine-rich repeat-containing protein 59	LRRC59	LDGNELDLSLSDLNEVPVK	19	0	2069.05	yes	yes	2	3	1.9744e-14	247.3	8792700
Q96AG4	Leucine-rich repeat-containing protein 59	LRRC59	RHEILQWVLQTDSQQ	15	1	1879.95	yes	yes	3		1.9984e-05	166.9	3443200
Q96AG4	Leucine-rich repeat-containing protein 59	LRRC59	WLDLKDNPLDPVLAK	15	1	1735.95	yes	yes	2	3	7.337e-05	196.97	30203000
Q96BN2	Transcriptional adapter 1	TADA1	DILTSVVSR	9	0	988.555	yes	yes	2		0.00043772	147.75	2727000
Q96BN2	Transcriptional adapter 1	TADA1	EVIPTHTVYALNIER	15	0	1753.94	yes	yes	3		0.0029153	96.135	2672000
Q96BN2	Transcriptional adapter 1	TADA1	ISKEEFDLEAHR	12	1	1472.73	yes	yes	3		0.00094755	127.52	1032900
Q96BN2	Transcriptional adapter 1	TADA1	NLSEALGDNVK	11	0	1158.59	yes	yes	2		7.1491e-07	187.78	2211500
Q96BN2	Transcriptional adapter 1	TADA1	YAFGSNVTPQPYLK	14	0	1583.8	yes	yes	2		2.4481e-07	198.48	1261500
Q96CM3	RNA pseudouridylate synthase domain-containing protein 4	RPUSD4	DMAHQVQELFR	11	0	1372.66	yes	yes	2	3	7.5865e-07	169.21	2306100
Q96CM3	RNA pseudouridylate synthase domain-containing protein 4	RPUSD4	FFVHSLHR	8	0	1041.55	yes	yes	2		0.0035677	127.46	1609000
Q96CM3	RNA pseudouridylate synthase domain-containing protein 4	RPUSD4	LEMPNEDQNENNEAK	15	0	1773.75	yes	yes	2		0.00012657	157.07	693060
Q96CM3	RNA pseudouridylate synthase domain-containing protein 4	RPUSD4	LRLEMPNEDQNENNEAK	17	1	2042.93	yes	yes	3		0.036356	51.127	0
Q96CM3	RNA pseudouridylate synthase domain-containing protein 4	RPUSD4	YIPLHLHAR	9	0	1118.63	yes	yes	2	3	0.0078223	110.31	20578000
Q96DI7	U5 small nuclear ribonucleoprotein 40 kDa protein	SNRNP40	GHADSVTGLSLSSEGSYLLSNAMDNTVR	28	0	2880.36	yes	yes	3		2.6963e-08	163.6	3872900		+
Q96DI7	U5 small nuclear ribonucleoprotein 40 kDa protein	SNRNP40	FHPNGSTLASAGFDR	15	0	1575.74	yes	yes	2	3	0.0031459	139.21	14253000	+
Q96DI7	U5 small nuclear ribonucleoprotein 40 kDa protein	SNRNP40	IFQGNVHNFEK	11	0	1331.66	yes	yes	2		1.2626e-06	175.74	14343000	+
Q96DI7	U5 small nuclear ribonucleoprotein 40 kDa protein	SNRNP40	HELLLGAGSGPGAGQQQATPGALLQAGPPR	30	0	2848.49	yes	yes	3		5.5531e-11	169.28	8528900	+
Q96DI7	U5 small nuclear ribonucleoprotein 40 kDa protein	SNRNP40	FVYVWDTTSR	10	0	1272.61	yes	yes	2		1.1626e-05	164.66	9579100
Q96DI7	U5 small nuclear ribonucleoprotein 40 kDa protein	SNRNP40	GPELPLVPVK	10	0	1047.63	yes	yes	2		0.033968	84.817	1108900
Q96DI7	U5 small nuclear ribonucleoprotein 40 kDa protein	SNRNP40	KGPELPLVPVK	11	1	1175.73	yes	yes	3		0.026724	69.216	4283800
Q96DI7	U5 small nuclear ribonucleoprotein 40 kDa protein	SNRNP40	LPGHAGSINEVAFHPDEPIIISASSDK	27	0	2800.4	yes	yes	3		1.4479e-06	127.54	3704200
Q96DI7	U5 small nuclear ribonucleoprotein 40 kDa protein	SNRNP40	LPGHAGSINEVAFHPDEPIIISASSDKR	28	1	2956.5	yes	yes	3	4	4.8008e-07	132.94	43156000
Q96DI7	U5 small nuclear ribonucleoprotein 40 kDa protein	SNRNP40	TVAVWDSETGER	12	0	1348.63	yes	yes	2		1.3526e-09	216.91	22283000
Q96DI7	U5 small nuclear ribonucleoprotein 40 kDa protein	SNRNP40	VWDVRPFAPK	10	1	1213.66	yes	yes	2	3	0.019039	123.11	36374000
Q96DV4	39S ribosomal protein L38, mitochondrial	MRPL38	DLFHGATFVPR	11	0	1258.65	yes	yes	2		0.0017285	118.77	1010300
Q96DV4	39S ribosomal protein L38, mitochondrial	MRPL38	LAFLLFK	7	0	850.532	yes	yes	2		0.025037	111.69	5322600
Q96DV4	39S ribosomal protein L38, mitochondrial	MRPL38	TASVPLDAVR	10	0	1027.57	yes	yes	2		0.0074255	105.17	4436300
Q96GD4	Aurora kinase B;Aurora kinase C;Aurora kinase A	AURKB	DIKPENLLLGLK	12	1	1351.81	yes	yes	2	3	0.0053881	109.39	866670
Q96GD4	Aurora kinase B;Aurora kinase C;Aurora kinase A	AURKB	FGNVYLAR	8	0	938.497	yes	no	2		0.039372	106.36	0
Q96HE9	Proline-rich protein 11	PRR11	VGISSIDISQSR	12	0	1260.67	yes	yes	2		6.721e-05	148.89	1464900
Q96HE9	Proline-rich protein 11	PRR11	VTNVLITPGK	10	0	1040.62	yes	yes	2		0.038497	81.92	828750
Q96J01	THO complex subunit 3	THOC3	MLASASEDHFIDIAEVETGDK	21	0	2277.05	yes	yes	3		7.7601e-15	241.79	10862000		+
Q96J01	THO complex subunit 3	THOC3	YVLGMQELFR	10	0	1254.64	yes	yes	2		2.3485e-06	169.99	23946000	+	+
Q96J01	THO complex subunit 3	THOC3	EFLAHSAK	8	0	901.466	yes	yes	2		0.020483	104.44	12978000
Q96J01	THO complex subunit 3	THOC3	TASVFLLEK	9	0	1006.57	yes	yes	2		6.5187e-05	157.99	29852000
Q96J01	THO complex subunit 3	THOC3	TASVFLLEKDR	11	1	1277.7	yes	yes	3		0.020985	84.198	5510000
Q96L58	Beta-1,3-galactosyltransferase 6	B3GALT6	AAAFLAVLVASAPR	14	0	1355.79	yes	yes	2	3	0.002089	119.39	2395000
Q96L58	Beta-1,3-galactosyltransferase 6	B3GALT6	FAVGTAGLGAEER	13	0	1276.64	yes	yes	2		1.5534e-07	203.88	15531000
Q96L58	Beta-1,3-galactosyltransferase 6	B3GALT6	HGDLLLLPALR	11	0	1216.73	yes	yes	2	3	0.0018487	119.34	8884600
Q96L58	Beta-1,3-galactosyltransferase 6	B3GALT6	LDALLAELR	9	0	1012.59	yes	yes	2		0.0017014	128.91	11521000
Q96MG7	Melanoma-associated antigen G1	NDNL2	DGFAEEAPSTSR	12	0	1265.55	yes	yes	2		0.011039	98.337	0
Q96MG7	Melanoma-associated antigen G1	NDNL2	HVIGDYKDIFPDLFK	15	1	1805.94	yes	yes	3		0.029068	65.956	658040
Q96MG7	Melanoma-associated antigen G1	NDNL2	VSELVQFLLIK	11	0	1287.78	yes	yes	2		9.4274e-07	181.4	443180
Q99848	Probable rRNA-processing protein EBP2	EBNA1BP2	AVDPEDDFQR	10	0	1190.52	yes	yes	2		0.029359	84.507	3383100
Q99848	Probable rRNA-processing protein EBP2	EBNA1BP2	ESYDDVSSFR	10	0	1203.5	yes	yes	2		0.018496	91.549	2471900
Q99848	Probable rRNA-processing protein EBP2	EBNA1BP2	GLLKPGLNVVLEGPK	15	1	1532.93	yes	yes	3		0.0021658	115.24	2661000
Q99848	Probable rRNA-processing protein EBP2	EBNA1BP2	LDVTLGPVPEIGGSEAPAPQNK	22	0	2188.14	yes	yes	2		0.0003324	117.55	947670
Q99848	Probable rRNA-processing protein EBP2	EBNA1BP2	RPTDYFAEMAK	11	1	1327.62	yes	yes	2		0.014961	97.957	2162200
Q9BYG3	MKI67 FHA domain-interacting nucleolar phosphoprotein	MKI67IP	IVAETMNNYLFGER	14	0	1655.8	yes	yes	2		2.4718e-14	247.17	5119600		+
Q9BYG3	MKI67 FHA domain-interacting nucleolar phosphoprotein	MKI67IP	GIDYDFPSLILQK	13	0	1507.79	yes	yes	2		2.0098e-14	244.73	5573900	+
Q9BYG3	MKI67 FHA domain-interacting nucleolar phosphoprotein	MKI67IP	DWNIPFK	7	0	918.46	yes	yes	2		0.024372	110.81	1248100
Q9BYG3	MKI67 FHA domain-interacting nucleolar phosphoprotein	MKI67IP	GYAFVEFESEDVAK	14	0	1589.72	yes	yes	2		2.87e-05	173.06	1010400
Q9BYG3	MKI67 FHA domain-interacting nucleolar phosphoprotein	MKI67IP	KGIDYDFPSLILQK	14	1	1635.89	yes	yes	3		0.018223	68.033	3580100
Q9BYG3	MKI67 FHA domain-interacting nucleolar phosphoprotein	MKI67IP	KKQEQLTPGVVYVR	14	2	1643.94	yes	yes	3		0.023433	90.689	3655800
Q9BYG3	MKI67 FHA domain-interacting nucleolar phosphoprotein	MKI67IP	KSQVAELNDDDKDDEIVFK	19	2	2207.06	yes	yes	3		0.0015396	115.2	981750
Q9BYG3	MKI67 FHA domain-interacting nucleolar phosphoprotein	MKI67IP	SQVAELNDDDKDDEIVFK	18	1	2078.96	yes	yes	2		6.169e-05	192.22	760290
Q9BYG3	MKI67 FHA domain-interacting nucleolar phosphoprotein	MKI67IP	VSGTLDTPEK	10	0	1045.53	yes	yes	2		0.00059149	138.25	2947400
Q9H147	Deoxynucleotidyltransferase terminal-interacting protein 1	DNTTIP1	AVLQPSINEEIQTVFNK	17	0	1929.02	yes	yes	2	3	0.0032487	126.07	0	+
Q9H147	Deoxynucleotidyltransferase terminal-interacting protein 1	DNTTIP1	DLAASDDYR	9	0	1024.45	yes	yes	2		0.0013137	134.23	1774700
Q9H147	Deoxynucleotidyltransferase terminal-interacting protein 1	DNTTIP1	SFVLPSWMVEK	11	0	1321.67	yes	yes	2		0.00033602	136.53	8239100
Q9H147	Deoxynucleotidyltransferase terminal-interacting protein 1	DNTTIP1	GRPPGHILSSDR	12	1	1290.68	yes	yes	3		0.0099579	96.229	14334000
Q9H147	Deoxynucleotidyltransferase terminal-interacting protein 1	DNTTIP1	LNESTTFVLGSR	12	0	1322.68	yes	yes	2		3.1532e-12	240.42	14321000
Q9H147	Deoxynucleotidyltransferase terminal-interacting protein 1	DNTTIP1	LTHELPGIK	9	0	1006.58	yes	yes	2		0.0092679	109.44	11065000
Q9H147	Deoxynucleotidyltransferase terminal-interacting protein 1	DNTTIP1	SQMTTSFTDPAISMDLLR	18	0	2012.95	yes	yes	2	3	3.3723e-24	289.68	5215900
Q9H3R5	Centromere protein H	CENPH	IEDLENEIEEVK	12	0	1458.71	yes	yes	2		2.2043e-11	221.09	909160
Q9H3R5	Centromere protein H	CENPH	ITTVIQHVFQNLILGSK	17	0	1910.1	yes	yes	3		0.042235	45.618	0
Q9H7B2	Ribosome production factor 2 homolog	RPF2	KPYGVLYK	8	1	966.554	yes	yes	2		0.024123	106.36	2090500
Q9H7B2	Ribosome production factor 2 homolog	RPF2	NITRPFEDQTSLEFFSK	17	1	2058.01	yes	yes	3		0.0013128	113.14	1808800
Q9H7B2	Ribosome production factor 2 homolog	RPF2	SLLIDFFR	8	0	1009.56	yes	yes	2		0.0076049	121.09	3251000
Q9H7B2	Ribosome production factor 2 homolog	RPF2	THLASDDLYK	10	0	1161.57	yes	yes	2		0.02816	86.014	2210800
Q9H9L3	Interferon-stimulated 20 kDa exonuclease-like 2	ISG20L2	VDLLGEFQSALPK	13	0	1415.77	yes	yes	2		0.0013213	120.9	3583000	+
Q9H9L3	Interferon-stimulated 20 kDa exonuclease-like 2	ISG20L2	ALQYFHPK	8	0	1002.53	yes	yes	2		0.031131	95.531	2202200
Q9H9L3	Interferon-stimulated 20 kDa exonuclease-like 2	ISG20L2	DTSHIPPLNR	10	0	1148.59	yes	yes	3		0.0035234	101.46	652660
Q9H9L3	Interferon-stimulated 20 kDa exonuclease-like 2	ISG20L2	SGHSSVEDAQATMELYK	17	0	1851.83	yes	yes	3		0.0012015	112.03	2039300
Q9NYL9	Tropomodulin-3	TMOD3	MLEENTNILK	10	0	1203.62	yes	yes	2		3.3699e-10	202.96	9687500		+
Q9NYL9	Tropomodulin-3	TMOD3	SNDPVATAFAEMLK	14	0	1492.72	yes	yes	2	3	5.9261e-08	211.13	3264000		+
Q9NYL9	Tropomodulin-3	TMOD3	QLETVLDDLDPENALLPAGFR	21	0	2325.19	yes	yes	2		0.0027467	87.062	200560	+
Q9NYL9	Tropomodulin-3	TMOD3	FGYQFTQQGPR	11	0	1327.63	yes	yes	2		6.0455e-12	227.36	5286000	+
Q9NYL9	Tropomodulin-3	TMOD3	DNETLAELK	9	0	1031.51	yes	yes	2		4.2827e-07	184.71	5266900
Q9NYL9	Tropomodulin-3	TMOD3	EHLLSYLEK	9	0	1130.6	yes	yes	3		0.019021	82.287	4282900
Q9NYL9	Tropomodulin-3	TMOD3	ENDAHLVEVNLNNIK	15	0	1720.87	yes	yes	3		3.0839e-05	162.31	2773500
Q9NYL9	Tropomodulin-3	TMOD3	ILPVFDEPPNPTNVEESLK	19	0	2137.09	yes	yes	2		6.3812e-07	182.47	1219300
Q9NYL9	Tropomodulin-3	TMOD3	ILPVFDEPPNPTNVEESLKR	20	1	2293.2	yes	yes	3		0.00098582	92.236	13598000
Q9NYL9	Tropomodulin-3	TMOD3	QQLGTAVELEMAK	13	0	1416.73	yes	yes	2		0.0011645	124.47	594360
Q9NYL9	Tropomodulin-3	TMOD3	TKENDAHLVEVNLNNIK	17	1	1950.02	yes	yes	3	4	2.5806e-07	208.38	10597000
Q9NYL9	Tropomodulin-3	TMOD3	YKDLDEDELLGNLSETELK	19	1	2223.08	yes	yes	2	3	9.1983e-06	182.28	17516000
Q9NYT0	Pleckstrin-2	PLEK2	EEISLSTVELSGTVVK	16	0	1689.9	yes	yes	2		0.0016301	128.45	1227000
Q9NYT0	Pleckstrin-2	PLEK2	GSLVSALEDNGVPTGVK	17	0	1641.86	yes	yes	2		5.4766e-05	175.7	837430
Q9UBU8	Mortality factor 4-like protein 1	MORF4L1	EYAVNEVVAGIK	12	0	1290.68	yes	no	2		3.4917e-06	174.23	1829800
Q9UBU8	Mortality factor 4-like protein 1	MORF4L1	IGAMLAYTPLDEK	13	0	1420.73	yes	no	2		0.00056945	138.02	1128200
Q9UBU8	Mortality factor 4-like protein 1	MORF4L1	NSATLFSASDYEVAPPEYHR	20	0	2253.03	yes	yes	3		4.9556e-06	166.62	3300900
Q9UBU8	Mortality factor 4-like protein 1	MORF4L1	VDPTVENEETFMNR	14	0	1679.75	yes	yes	2		3.0009e-07	193.06	1500900
Q9UH62	Armadillo repeat-containing X-linked protein 3	ARMCX3	AQVPSSLGSLFNK	13	0	1346.72	yes	yes	2		0.00086405	133.04	969060
Q9UH62	Armadillo repeat-containing X-linked protein 3	ARMCX3	DLGGLPIVAK	10	0	981.586	yes	yes	2		0.035515	85.355	967380
Q9UH62	Armadillo repeat-containing X-linked protein 3	ARMCX3	LFSAGNEETK	10	0	1094.52	yes	yes	2		0.0010793	125.68	690140
Q9UH62	Armadillo repeat-containing X-linked protein 3	ARMCX3	LNSSVQLAGLR	11	0	1156.66	yes	yes	2		1.3312e-06	178.95	1061200
Q9UH62	Armadillo repeat-containing X-linked protein 3	ARMCX3	VLGIESHHDFLVK	13	0	1492.8	yes	yes	3		0.039759	57.225	894290
Q9UKM9	RNA-binding protein Raly	RALY	GYAFVQYSNER	11	0	1332.61	yes	yes	2		0.0038203	109.39	859730
Q9UKM9	RNA-binding protein Raly	RALY	KSDVETIFSK	10	1	1152.6	yes	yes	2		0.014012	94.538	0
Q9UKM9	RNA-binding protein Raly	RALY	VFIGNLNTALVK	12	0	1287.76	yes	yes	2		1.6034e-05	166.11	2401500
Q9Y295	Developmentally-regulated GTP-binding protein 1	DRG1	IQLLDLPGIIEGAK	14	0	1478.87	yes	yes	2	3	0.00055912	150.37	12262000	+
Q9Y295	Developmentally-regulated GTP-binding protein 1	DRG1	DHTLEDEDVIQIVK	14	0	1652.83	yes	yes	2	3	1.1407e-14	253.97	3322700
Q9Y295	Developmentally-regulated GTP-binding protein 1	DRG1	SDATADDLIDVVEGNR	16	0	1688.79	yes	yes	2	3	1.155e-18	272.96	9478700
Q9Y295	Developmentally-regulated GTP-binding protein 1	DRG1	GGGGGGPGEGFDVAK	15	0	1260.57	yes	yes	2		0.002038	127.79	3532300
Q9Y295	Developmentally-regulated GTP-binding protein 1	DRG1	GQLPDYTSPVVLPYSR	16	0	1790.92	yes	yes	2		0.00019059	156.11	1338500
Q9Y295	Developmentally-regulated GTP-binding protein 1	DRG1	IAEIEAEMAR	10	0	1131.56	yes	yes	2		3.0864e-07	177.57	3918100
Q9Y295	Developmentally-regulated GTP-binding protein 1	DRG1	IDQISIEELDIIYK	14	0	1690.9	yes	yes	2		0.013154	103.77	830160
Q9Y295	Developmentally-regulated GTP-binding protein 1	DRG1	IGFVGFPSVGK	11	0	1106.61	yes	yes	2		0.0041346	113.67	6846400
Q9Y295	Developmentally-regulated GTP-binding protein 1	DRG1	IIENELEGFGIR	12	0	1388.73	yes	yes	2		1.0826e-06	186.16	9357300
Q9Y295	Developmentally-regulated GTP-binding protein 1	DRG1	WNFDDLLEK	9	0	1178.56	yes	yes	2		0.00083434	137.46	2981200
Q9Y2P8	RNA 3-terminal phosphate cyclase-like protein	RCL1	ATALPLLK	8	0	825.532	yes	yes	2		0.03653	96.492	1513800
Q9Y2P8	RNA 3-terminal phosphate cyclase-like protein	RCL1	DFEASFIR	8	0	983.471	yes	yes	2		0.011294	115.49	1229700
Q9Y2P8	RNA 3-terminal phosphate cyclase-like protein	RCL1	GVTNDQVDPSVDVLK	15	0	1584.8	yes	yes	2		1.0282e-13	238.64	3426300
Q9Y2P8	RNA 3-terminal phosphate cyclase-like protein	RCL1	LLLEEIYR	8	0	1047.6	yes	yes	2		0.00077606	147.29	2155600
Q9Y2P8	RNA 3-terminal phosphate cyclase-like protein	RCL1	VLKPIQLTDPGK	12	1	1307.78	yes	yes	3		0.031234	73.9	1670700
Q9Y2P8	RNA 3-terminal phosphate cyclase-like protein	RCL1	VLLGPLSPYTIEFLR	15	0	1716.98	yes	yes	2		0.0049856	101.75	477220
Q9Y3A4	Ribosomal RNA-processing protein 7 homolog A	RRP7A	AKEEEGVPDEEGWVK	15	1	1700.79	yes	no	3		0.029555	68.033	1763100
Q9Y3A4	Ribosomal RNA-processing protein 7 homolog A	RRP7A	DPEDRIPSPLGYAAIPIK	18	1	1951.04	yes	yes	3		9.6781e-05	169.15	1547300
Q9Y3A4	Ribosomal RNA-processing protein 7 homolog A	RRP7A	GPLLVSTESHPVK	13	0	1362.75	yes	yes	2	3	0.00057241	123.95	6967900
Q9Y3A4	Ribosomal RNA-processing protein 7 homolog A	RRP7A	IPSPLGYAAIPIK	13	0	1338.79	yes	yes	2		0.00098025	130.56	5752900
Q9Y3A4	Ribosomal RNA-processing protein 7 homolog A	RRP7A	MEHLAQLR	8	0	996.517	yes	no	2		0.012936	112.41	1401800
Q9Y3A4	Ribosomal RNA-processing protein 7 homolog A	RRP7A	PVPGFQVAYVVFQK	14	0	1577.86	yes	yes	2		0.035153	72.705	444910
Q9Y3A4	Ribosomal RNA-processing protein 7 homolog A	RRP7A	VEVDTFMEAYDQK	13	0	1573.7	yes	yes	2		1.1298e-14	251.24	2446400
Q9Y3A4	Ribosomal RNA-processing protein 7 homolog A	RRP7A	WISDYADSVPDPEALR	16	0	1832.86	yes	yes	2		0.00034853	151.49	2227400
Q9Y3F4	Serine-threonine kinase receptor-associated protein	STRAP	AATAAADFTAK	11	0	1036.52	yes	yes	2		0.042166	79.036	3032600
Q9Y3F4	Serine-threonine kinase receptor-associated protein	STRAP	EFLVAGGEDFK	11	0	1210.59	yes	yes	2		1.3736e-05	166.29	4410900
Q9Y3F4	Serine-threonine kinase receptor-associated protein	STRAP	SFEAPATINSASLHPEK	17	0	1797.89	yes	yes	3		0.017388	66.809	12330000
Q9Y3F4	Serine-threonine kinase receptor-associated protein	STRAP	SFEAPATINSASLHPEKEFLVAGGEDFK	28	1	2990.47	yes	yes	3		0.0078455	74.63	1412600
Q9Y3F4	Serine-threonine kinase receptor-associated protein	STRAP	SIAFHSAVSLDPIK	14	0	1483.8	yes	yes	2	3	0.0093023	93.228	8821500
Q9Y3F4	Serine-threonine kinase receptor-associated protein	STRAP	FSPDGELYASGSEDGTLR	18	0	1899.85	yes	yes	2		1.1933e-06	180.39	3012700
Q9Y3F4	Serine-threonine kinase receptor-associated protein	STRAP	GAVWGATLNK	10	0	1015.55	yes	yes	2		0.003911	117.71	2793200
Q9Y3F4	Serine-threonine kinase receptor-associated protein	STRAP	IYDLNKPEAEPK	12	1	1415.73	yes	yes	2	3	4.1379e-08	226.42	19378000
Q9Y3F4	Serine-threonine kinase receptor-associated protein	STRAP	LWQTVVGK	8	0	929.533	yes	yes	2		0.0029226	134.77	2997500
Q9Y3F4	Serine-threonine kinase receptor-associated protein	STRAP	TVDFTQDSNYLLTGGQDK	18	0	2000.93	yes	yes	2		5.1354e-24	284.46	5347700
Q9Y3F4	Serine-threonine kinase receptor-associated protein	STRAP	VWDAVSGDELMTLAHK	16	0	1770.86	yes	yes	3		0.0027146	96.247	4025500
Q9Y3F4	Serine-threonine kinase receptor-associated protein	STRAP	YDYNSGEELESYK	13	0	1595.66	yes	yes	2		1.0726e-10	225.21	3877700
Q9Y5K5	Ubiquitin carboxyl-terminal hydrolase isozyme L5	UCHL5	FNLMAIVSDR	10	0	1164.6	yes	yes	2		0.00098883	125.72	861610
Q9Y5K5	Ubiquitin carboxyl-terminal hydrolase isozyme L5	UCHL5	TLAEHQQLIPLVEK	14	0	1617.91	yes	yes	3		0.015158	73.219	1884300
