# Supplementary material for: LncRNA GClnc1 Promotes Gastric Carcinogenesis and May Act as a Modular Scaffold of WDR5 and KAT2A Complexes to Specify the Histone Modification Pattern
Source: Oxford University Press journal article supplement (doi:10.1158/2159-8290.cd-15-0921), 2016-05-05
Supplement: 21598290cd150921-sup-tabs1-3.xls [file 21598290cd150921-sup-tabs1-3.xls]

## Sheet: Table S1
Supplementary Table 1. Identificantion of eight lncRNAs candidates upregulation from 10 pairs GC and adjacent tissues
	P-value	Fold change and Regulation		Group--Raw Intensity		Group--Normalized Intensity		Raw Intensity																				Normalized Intensity																				Annotations
ProbeName	P-value	FCAbsolute	regulation	C(raw)	N(raw)	C(normalized)	N(normalized)	[377325C, C](raw)	[377325N, N](raw)	[378121C, C](raw)	[378121N, N](raw)	[378690C, C](raw)	[378690N, N](raw)	[385681C, C](raw)	[385681N, N](raw)	[385867C, C](raw)	[385867N, N](raw)	[387239C, C](raw)	[387239N, N](raw)	[388273C, C](raw)	[388273N, N](raw)	[390509C, C](raw)	[390509N, N](raw)	[391832C, C](raw)	[391832N, N](raw)	[392373C, C](raw)	[392373N, N](raw)	[377325C, C](normalized)	[377325N, N](normalized)	[378121C, C](normalized)	[378121N, N](normalized)	[378690C, C](normalized)	[378690N, N](normalized)	[385681C, C](normalized)	[385681N, N](normalized)	[385867C, C](normalized)	[385867N, N](normalized)	[387239C, C](normalized)	[387239N, N](normalized)	[388273C, C](normalized)	[388273N, N](normalized)	[390509C, C](normalized)	[390509N, N](normalized)	[391832C, C](normalized)	[391832N, N](normalized)	[392373C, C](normalized)	[392373N, N](normalized)	type	seqname
ASHG19A3A029671	0.00268478	2.15491	up	20004.6	13157.3	14.0904	12.9828	18099	2071.27	11113.7	2327.66	3053.38	1864.83	23908.4	22645.7	20119.6	5076.84	24000.2	32162	25121.8	9426.14	25263.6	22570.7	23093.8	16059.3	26272.1	17369	13.7575	11.3684	13.4361	11.533	11.9392	11.4938	14.2764	14.273	13.8938	12.3294	14.9469	14.3966	15.0652	12.7555	14.7643	14.1974	14.4028	13.7865	14.4219	13.6941	noncoding	ENST00000430239
ASHG19A3A014204	0.000226304	2.866	up	12115	4627.96	13.3119	11.7929	7670.18	1377.88	11713.2	1492.91	2475.91	1065	6599.64	5504.49	8898.49	4194.92	10039.2	4319.83	8398.49	8008.06	16507.5	7909.1	22288.4	7729.69	26559.3	4677.72	12.5327	10.7177	13.5132	10.8308	11.6159	10.6222	12.3878	12.1876	12.7634	12.0468	13.759	11.6246	13.5668	12.521	14.196	12.7678	14.3505	12.8068	14.4337	11.8035	noncoding	NR_024373
ASHG19A3A030767	0.000922192	2.43295	up	8428.94	3953.03	12.8354	11.5527	3896.29	1541.3	7385.97	1427.38	1964.72	842.756	4943.66	2721.6	7332.24	4178.21	11663.9	2964.28	11074.8	4809.13	15280.8	8232.59	9763.16	7958.57	10983.8	4854.48	11.5562	10.9033	12.8599	10.7559	11.2434	10.2409	11.9576	11.1924	12.5005	12.0412	13.971	11.1004	13.9147	11.7798	14.0895	12.8248	13.1283	12.8356	13.1329	11.8527	noncoding	BC041951
ASHG19A3A040517	0.000401311	2.24072	up	7279.91	3674.6	12.6503	11.4864	6861.82	1444.89	8162.59	1660.08	1563.56	1056.57	11556.7	6598.89	8867.51	1342.84	3994.6	6162.55	3798.27	3800.71	7691.75	4516.52	9831.75	4464.69	10470.6	5698.32	12.3802	10.7932	12.9986	10.9988	10.8912	10.6084	13.1898	12.4632	12.7573	10.3625	12.464	12.1064	12.4287	11.4473	13.2047	11.9679	13.1371	12.0268	13.0517	12.0891	noncoding	ENST00000437286
ASHG19A3A032982	0.000458728	2.07448	up	4873.57	2182.29	11.8303	10.7776	2034.51	912.506	3043.78	940.646	1256.13	836.4	9034.69	4299.92	2597.24	1379.98	1665.26	2097.67	1571.48	1770.12	4913.91	3589.87	11136.8	3688.23	11481.9	2307.61	10.6616	10.095	11.6159	10.1195	10.5569	10.2288	12.8432	11.825	10.9655	10.4075	11.3197	10.6382	11.2375	10.3471	12.6094	11.6159	13.3066	11.7094	13.187	10.7894	noncoding	AK094163
ASHG19A3A052760	0.00150633	3.23968	up	3904.86	2098.86	10.7314	9.03558	389.696	90.2624	1002.26	98.8797	267.992	207.72	4084.7	648.811	513.615	174.009	890.414	585.809	791.345	141.37	15444.2	8268.41	7457.63	8298.35	8206.8	2475.02	8.37031	6.65418	10.1063	6.78444	8.2396	8.06362	11.6835	9.16116	8.61995	7.41607	10.4627	8.89485	10.2906	6.77042	14.106	12.8322	12.7389	12.8905	12.6965	10.8884	noncoding	BC015134
ASHG19A3A026656	0.00127009	3.45481	up	2836.18	635.221	10.9526	9.16397	549.004	440.253	3642.16	433.512	657.949	352.604	3972.73	1039.44	729.656	545.085	1230.01	643.967	1218.99	733.955	2166.61	645.429	6501.09	723.236	7693.63	794.73	8.85262	8.98872	11.8635	8.95418	9.58691	8.88368	11.6483	9.82476	9.12821	9.03649	10.9093	9.01769	10.9044	9.09433	11.4854	9.17175	12.5343	9.40526	12.6128	9.26285	noncoding	AK001058
ASHG19A3A033680	0.000291353	2.05156	up	1912.87	1029.7	10.7298	9.69306	1715.15	374.58	1342.89	375.98	654.076	507.553	4960.29	1626.91	1344.24	596.255	1153.67	1119.83	1102.01	905.342	1520.86	1780.2	2452.03	1769.08	2883.52	1241.24	10.4228	8.75462	10.5025	8.74539	9.57865	9.45117	11.9629	10.4725	10.0067	9.16906	10.818	9.7746	10.757	9.38783	10.9782	10.6143	11.0949	10.6581	11.1761	9.90307	noncoding	ENST00000429630
Raw Intensity > 1500, fold change > 2, P < 0.01
[truncated: 16 more columns]

## Sheet: Table S2
Supplementary Table 2.Clinial information of 165 cases GC patients (fresh tissues)
Patients	Gender	Age	Tumour size	Pathological stage	AJCC	Alive or dead	Survival time
1	Female	70	32	Moderate	IIIB	dead	18
2	Male	69	122	Poor	IIIB	dead	10
3	Female	69	40	Poor	IIIA	dead	5
4	Male	71	6	Moderate	IIB	alive	34
5	Male	37	0.2	Moderate	IA	dead	50
6	Female	57	24	Poor	IIB	dead	4
7	Male	71	50	Moderate	IIIB	dead	16
8	Female	52	1	Poor	IB	alive	52
9	Male	58	4	Poor	IIIC	alive	12
10	Female	24	81	Moderate	IIIC	dead	9
11	Male	42	12	Poor	IA	alive	76
12	Male	73	8	High	IA	alive	25
13	Male	57	300	Poor	IIIC	dead	10
14	Male	52	9	Moderate	IB	dead	24
15	Male	66	48	Poor	IIIC	dead	10
16	Male	54	30	Moderate	IIIB	dead	37
17	Female	48	32	Poor	IIA	alive	7
18	Male	59	29	Poor	IIIB	dead	12
19	Male	54	60	Moderate	IIIB	alive	10
20	Male	60	28	Poor	IIA	alive	27
21	Male	55	6	Poor	IIIB	alive	54
22	Male	46	53	Poor	IIIC	dead	7
23	Male	58	105	Moderate	IIA	alive	47
24	Male	78	240	Poor	IIIB	dead	13
25	Female	76	25	Moderate	IIIC	dead	4
26	Male	80	12	Poor	IIB	alive	4
27	Male	56	42	Poor	IV	dead	7
28	Male	57	2	Poor	IA	alive	56
29	Male	59	16	Poor	IIIA	alive	24
30	Female	71	36	Moderate	IIIC	alive	12
31	Female	84	33	Moderate	IIB	alive	60
32	Male	78	50	Poor	IIB	dead	36
33	Male	78	60	Moderate	IIB	alive	13
34	Male	80	100	Moderate	IV	dead	8
35	Female	74	72	Poor	IIB	alive	13
36	Male	80	30	Moderate	IIIA	alive	50
37	Female	50	42	Poor	IIIC	dead	6
38	Male	62	41	Moderate	IIA	alive	28
39	Male	65	96	Poor	IIIA	dead	20
40	Male	61	2	Poor	IIB	dead	13
41	Male	70	448	Poor	IIIC	dead	10
42	Male	55	84	Poor	IIIA	alive	71
43	Male	77	27	Moderate	IIB	alive	68
44	Female	58	112	Moderate	IIB	dead	3
45	Male	67	35	Poor	IIIC	dead	8
46	Male	39	25	Poor	IIIA	alive	25
47	Female	42	48	Moderate	IIIC	dead	13
48	Female	60	45	Moderate	IIIA	dead	12
49	Female	49	117	Poor	IIIC	alive	23
50	Female	78	13	Moderate	IB	dead	13
51	Male	66	1	High	IB	alive	69
52	Male	46	45	Poor	IIIB	alive	53
53	Male	52	36	Poor	IIA	dead	63
54	Male	55	1	High	IA	alive	26
55	Male	58	9	Moderate	IA	alive	25
56	Male	72	9	High	IIIA	dead	15
57	Male	74	5	Moderate	IIA	dead	12
58	Male	46	11	Poor	IIIA	alive	34
59	Female	48	30	Poor	IIIC	dead	12
60	Male	53	90	Moderate	IIIA	dead	5
61	Male	60	26	High	IIIA	alive	37
62	Female	46	49	Poor	IIIB	dead	12
63	Male	79	320	Poor	IIA	alive	22
64	Male	52	75	Poor	IV	dead	14
65	Male	74	32	Moderate	IB	dead	8
66	Male	59	15	Moderate	IIIC	alive	48
67	Male	73	168	High	IV	dead	10
68	Female	58	16	Poor	IA	dead	14
69	Male	81	126	Moderate	IIIC	dead	5
70	Male	52	39	Moderate	IIIB	alive	70
71	Male	60	21	Poor	IIIB	dead	13
72	Male	74	1	Moderate	IA	alive	24
73	Male	51	117	Poor	IIIB	dead	11
74	Male	73	6	Moderate	IA	alive	67
75	Male	68	108	Poor	IIIB	dead	15
76	Male	57	23	Poor	IIIB	dead	12
77	Male	49	45	Poor	IV	dead	11
78	Male	52	16	Poor	IIIA	dead	8
79	Male	57	12	Moderate	IIIB	dead	47
80	Female	79	72	Poor	IV	dead	26
81	Female	37	72	Poor	IB	alive	34
82	Female	64	24	Poor	IIIC	dead	24
83	Male	37	30	Poor	IV	alive	69
84	Female	52	27	Poor	IIIB	dead	11
85	Male	80	2	Poor	IIA	alive	44
86	Male	63	20	Poor	IIIA	alive	28
87	Male	71	6	Poor	IIB	dead	17
88	Male	80	20	Moderate	IIA	alive	44
89	Male	66	18	Poor	IIA	dead	62
90	Female	49	16	Poor	IIIC	dead	12
91	Male	49	2	Moderate	IA	alive	50
92	Male	61	20	Moderate	IB	alive	53
93	Male	78	40	Moderate	IIA	dead	14
94	Male	77	33	Moderate	IIIA	alive	11
95	Female	77	39	Moderate	IIB	dead	5
96	Female	59	576	Poor	IIIC	dead	21
97	Male	87	96	Poor	IIIB	dead	15
98	Female	71	24	Poor	IIIA	dead	2
99	Male	78	203	Poor	IIIB	dead	15
100	Male	55	8	Moderate	IIIA	dead	12
101	Male	58	520	Poor	IV	dead	8
102	Male	56	144	Moderate	IIIA	dead	9
103	Male	58	6	High	IB	dead	24
104	Male	77	15	Moderate	IIIB	dead	7
105	Female	64	33	Moderate	IIIC	alive	19
106	Female	45	480	Poor	IIIC	alive	27
107	Female	55	2	Poor	IA	alive	47
108	Male	53	14	Poor	IIIC	dead	6
109	Male	64	99	Moderate	IIB	dead	12
110	Male	61	68	Poor	IIIC	alive	24
111	Male	70	24	Poor	IIIA	dead	24
112	Male	58	182	Poor	IIIA	dead	12
113	Male	65	14	Moderate	IB	dead	37
114	Male	69	7	Moderate	IB	alive	58
115	Male	76	216	Poor	IIIC	dead	7
116	Male	58	45	Moderate	IIIB	dead	27
117	Male	69	63	Poor	IIIC	dead	14
118	Male	48	16	High	IIIA	dead	14
119	Female	51	7	Poor	IIA	alive	43
120	Female	58	71	Poor	IIIC	alive	26
121	Male	63	64	Poor	IIIA	dead	13
122	Male	67	35	Poor	IIIC	dead	35
123	Female	68	6	Moderate	IB	dead	29
124	Female	53	5	Poor	IIB	dead	5
125	Male	56	1	Moderate	IIB	alive	46
126	Female	22	24	Poor	IIA	alive	27
127	Male	61	55	Poor	IIIA	dead	12
128	Male	65	18	Moderate	IIA	alive	68
129	Female	63	36	Poor	IIIC	dead	15
130	Male	69	20	Poor	IIB	alive	21
131	Female	57	10	Moderate	IIIB	alive	12
132	Female	27	37	Poor	IIIB	dead	12
133	Female	79	38	Moderate	IV	dead	13
134	Female	53	79	Poor	IIIC	dead	12
135	Male	54	14	High	IIB	alive	13
136	Female	74	9	Moderate	IB	alive	52
137	Female	77	77	Poor	IIIC	dead	15
138	Male	58	20	Poor	IIIB	dead	24
139	Male	60	25	Poor	IV	dead	10
140	Female	60	11	High	IIB	alive	13
141	Female	61	12	Poor	IIB	alive	28
142	Female	66	20	Poor	IIIB	alive	27
143	Female	62	48	Poor	IIIC	dead	7
144	Male	70	2	Moderate	IA	alive	67
145	Male	54	180	Moderate	IIIA	dead	5
146	Female	35	7	Poor	IIIB	alive	69
147	Male	82	39	Poor	IIIA	dead	11
148	Female	78	96	Poor	IIIC	alive	29
149	Female	41	60	Poor	IIIB	dead	20
150	Male	58	9	Poor	IIIB	dead	12
151	Male	65	144	Moderate	IIA	alive	69
152	Female	63	189	Moderate	IV	alive	27
153	Male	49	30	Poor	IIA	dead	7
154	Male	53	72	Poor	IIIB	dead	13
155	Male	51	61	Moderate	IB	alive	76
156	Male	58	3	Poor	IIA	dead	23
157	Male	60	1	High	IA	alive	72
158	Female	42	49	Moderate	IV	dead	13
159	Male	63	45	Poor	IIB	alive	64
160	Female	74	85	Moderate	IIIA	dead	4
161	Female	85	50	Moderate	IIIB	dead	6
162	Female	83	117	Poor	IIIA	dead	6
163	Male	51	143	Poor	IIIC	dead	18
164	Male	69	96	Poor	IIIB	dead	12
165	Female	76	5	Poor	IIA	dead	6

## Sheet: Table S3
Supplementary Table 3. Clinial information of 105 cases GC patients (paraffin tissues)
Patients	Gender	Age	Tumour size	Pathological stage	AJCC	Alive or dead	Survival time
1	Male	53	11	High	IIIA	dead	23
2	Male	39	24	Poor	IIIB	dead	7
3	Male	40	44	Moderate	IB	dead	64
4	Female	67	22	Poor	IIIB	dead	19
5	Male	43	18	Moderate	IIB	dead	31
6	Male	51	51	High	IIIB	dead	19
7	Female	64	12	Poor	IB	dead	13
8	Female	49	9	Poor	IIIA	dead	29
9	Male	62	60	High	IIIB	dead	9
10	Female	61	8	High	IIIA	dead	5
11	Female	53	8	Poor	IIIA	dead	65
12	Female	64	162	Moderate	IIB	dead	10
13	Male	60	77	Poor	IIIB	dead	7
14	Female	49	16	Poor	IIIB	dead	7
15	Female	54	160	Poor	IIIA	dead	65
16	Male	65	1	Moderate	IIB	dead	46
17	Female	51	98	Moderate	IIB	dead	15
18	Male	52	2	High	IA	dead	67
19	Male	70	113	Poor	IV	dead	6
20	Female	55	18	Moderate	IIIA	dead	17
21	Male	68	105	High	IIIB	dead	13
22	Male	54	108	Poor	IV	alive	80+
23	Male	57	15	High	IA	alive	80+
24	Male	63	4	High	IIA	dead	25
25	Male	57	40	Poor	IIIA	dead	18
26	Male	74	45	Poor	IIIB	dead	4
27	Female	56	12	Poor	IIB	dead	62
28	Male	58	5	Poor	IIIA	dead	10
29	Male	69	58	Moderate	IIIB	dead	7
30	Female	51	2	Poor	IIIA	dead	23
31	Male	70	15	Poor	IIA	dead	29
32	Female	75	21	High	IIIA	dead	10
33	Male	66	5	Poor	IIIB	dead	21
34	Male	46	45	Poor	IIB	dead	50
35	Male	54	35	Moderate	IIIA	dead	48
36	Male	72	23	Moderate	IIIB	dead	18
37	Male	55	84	Poor	IV	dead	12
38	Male	52	16	High	IIIC	dead	22
39	Male	59	216	High	IIIC	dead	19
40	Male	65	24	Moderate	IIIB	dead	7
41	Male	70	2	Moderate	IIIB	dead	25
42	Female	59	4	Poor	IA	alive	80+
43	Female	49	117	Poor	IIIA	dead	62
44	Male	61	80	High	IIIA	dead	4
45	Male	53	18	High	IIIA	dead	2
46	Female	68	1	Moderate	IIIB	dead	13
47	Female	47	2	Poor	IIIB	dead	4
48	Male	70	63	Moderate	IIIB	dead	64
49	Male	48	1	High	IA	alive	80+
50	Male	56	36	High	IIIB	dead	16
51	Female	46	16	Poor	IIIB	dead	26
52	Male	47	72	Poor	IIIA	dead	8
53	Female	54	32	Poor	IIIA	dead	14
54	Male	55	60	High	IIIB	dead	12
55	Female	60	11	Moderate	IIB	dead	50
56	Female	61	26	Poor	IIIB	dead	6
57	Female	39	9	Poor	IV	dead	16
58	Male	74	9	Poor	IIIB	dead	8
59	Male	73	126	High	IIIA	dead	7
60	Male	69	15	High	IIB	dead	35
61	Male	58	32	Moderate	IIB	dead	39
62	Female	70	84	Poor	IIIB	dead	10
63	Male	54	4	Moderate	IIIB	alive	80+
64	Male	48	9	Poor	IIA	dead	43
65	Male	77	42	Moderate	IV	dead	6
66	Male	84	117	High	IIIB	alive	80+
67	Male	77	3	Moderate	IIB	dead	9
68	Male	67	180	Moderate	IIIB	dead	12
69	Male	65	9	High	IIA	alive	80+
70	Male	60	162	High	IIIA	dead	22
71	Male	53	18	High	IIB	dead	55
72	Female	73	6	Poor	IIIA	dead	23
73	Male	71	34	High	IIB	dead	17
74	Male	48	298	High	IIIA	alive	79
75	Male	72	140	Poor	IIIB	dead	17
76	Male	66	10	Moderate	IIA	alive	76
77	Female	77	180	Poor	IIIB	dead	20
78	Male	75	12	Poor	IIA	dead	50
79	Female	80	21	High	IA	alive	79
80	Female	63	9	High	IIA	alive	78
81	Male	78	21	Moderate	IIIA	alive	78
82	Female	57	196	High	IV	dead	17
83	Male	45	18	High	IV	dead	23
84	Female	50	5	Poor	IIIA	dead	17
85	Male	76	45	Poor	IIIA	dead	9
86	Male	71	4	High	IV	dead	17
87	Female	73	24	Moderate	IIIB	dead	20
88	Female	58	8	High	IIB	alive	77
89	Male	59	6	Poor	IB	alive	77
90	Male	72	13	Poor	IIA	dead	36
91	Male	56	2	Moderate	IIA	dead	73
92	Male	62	3	High	IA	alive	77
93	Male	68	14	Moderate	IIIA	dead	23
94	Female	74	15	High	IV	dead	7
95	Female	81	18	Poor	IIIA	dead	3
96	Male	47	39	Poor	IV	dead	38
97	Male	72	19	Moderate	IIIA	dead	69
98	Female	67	11	Moderate	IIA	alive	76
99	Female	59	3	Moderate	IB	alive	76
100	Female	74	15	Moderate	IIIA	dead	53
101	Female	58	20	Moderate	IIIB	alive	76
102	Male	62	25	Moderate	IIIB	dead	11
103	Male	52	9	Poor	IIIA	alive	76
104	Male	62	29	Poor	IIIC	dead	17
105	Male	61	36	Poor	IIIA	alive	76
